# Supplementary material for: Genome-wide haplotype association analysis of primary biliary cholangitis risk in Japanese
Source: PubMed Central journal article supplement (PMC5958065; doi:10.1038/s41598-018-26112-1), 2018-05-17
Supplement: 41598_2018_26112_MOESM1_ESM.pdf [file 41598_2018_26112_MOESM1_ESM.pdf]

## Supplementary Information

**Title:** Genome-wide haplotype association analysis of primary biliary cholangitis risk in Japanese

**Authors:** Cindy Im,<sup>1\*</sup> Yadav Sapkota,<sup>2</sup> Wonjong Moon,<sup>2</sup> Minae Kawashima,<sup>3</sup> Minoru Nakamura,<sup>4</sup> Katsushi Tokunaga,<sup>3</sup> Yutaka Yasui<sup>1,2\*</sup>

### **Affiliations:**

1. School of Public Health, University of Alberta, Edmonton, Alberta T6G 1C9, Canada
2. Department of Epidemiology and Cancer Control, St. Jude Children's Research Hospital, Memphis, TN 38105, USA
3. Department of Human Genetics, Graduate School of Medicine, The University of Tokyo, Tokyo 113-0033, Japan
4. Department of Hepatology, Nagasaki University Graduate School of Biomedical Sciences and Clinical Research Center, National Hospital Organization Nagasaki Medical Center, Omura, Nagasaki, 856-8562, Japan

**Supplementary Figure S1:** Example schematic of RefSeq gene-based analytic windows used for haplotype formation in the main analysis. The bracketed region highlighted in red, which includes the RefSeq gene transcript and flanking 500-kb regions before and after transcription start/stop sites, spans typical genomic elements included in any given gene analytic window.

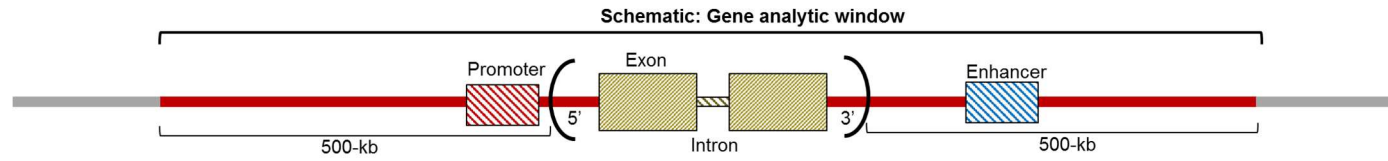

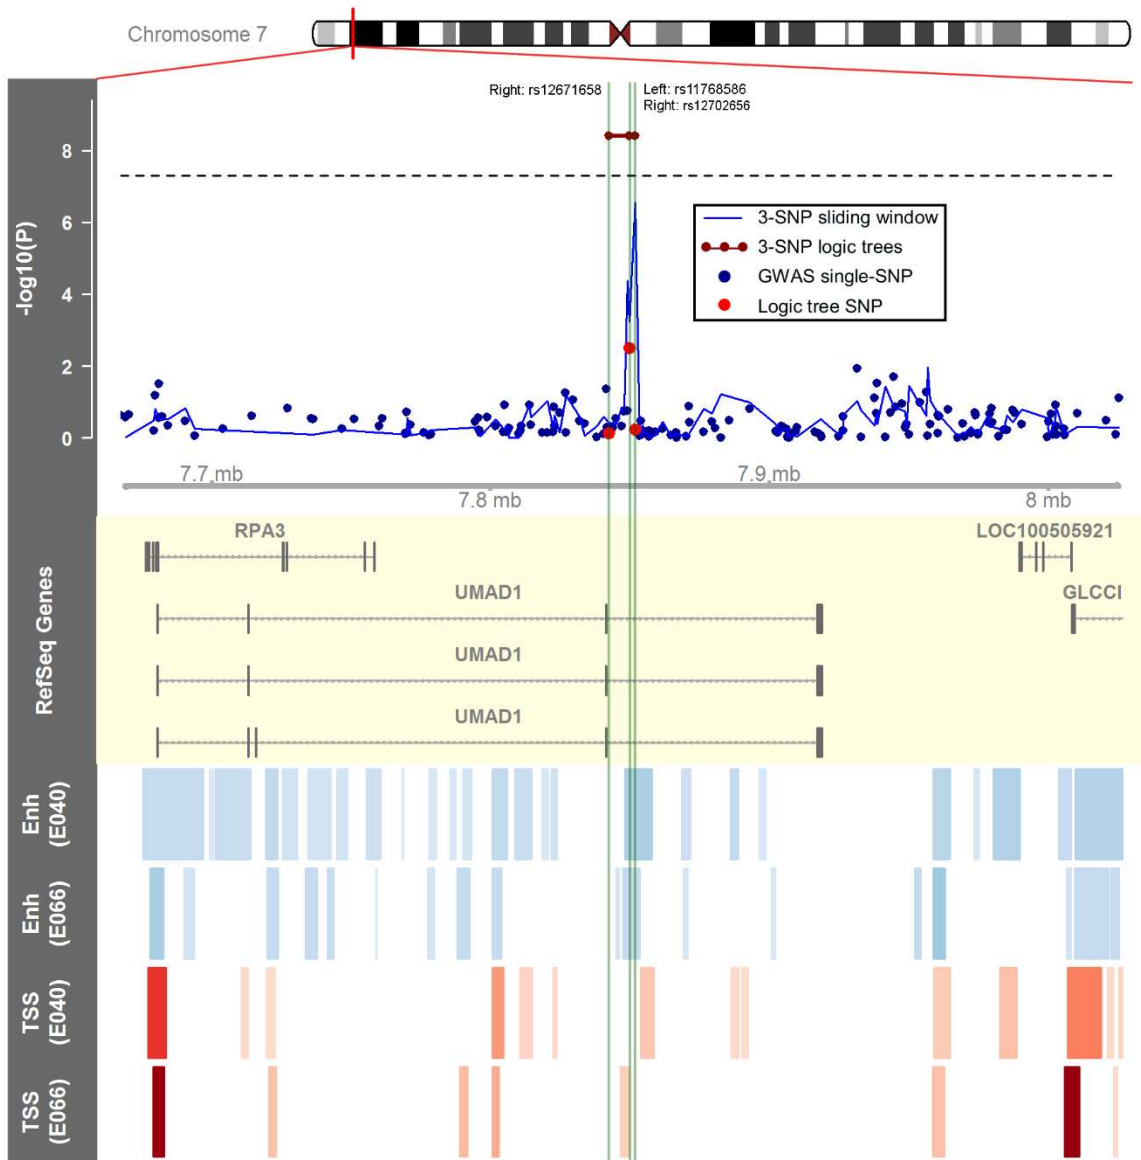

**Supplementary Figure S2:** Visualization of the region surrounding the replicated 3-SNP haplotype logic tree for chromosome 7 (chr7:7667281-8026742, hg19; corresponds to the red band in the chromosomal ideogram). The top data track shows single-SNP association results and haplotype association results using benchmark (“3-SNP sliding window”) and proposed (“3-SNP logic tree”) methods for the selected genomic region. The annotation tracks beneath show RefSeq genes, a heatmap corresponding to Roadmap Epigenomics<sup>21</sup> H3K4me1 (Enh or enhancer) and H3K4me3 (TSS or promoter) ChIP-seq peaks in primary T helper memory cells (E040) and liver cells (E066). No significant eQTLs were associated with SNPs in replicated haplotypes.

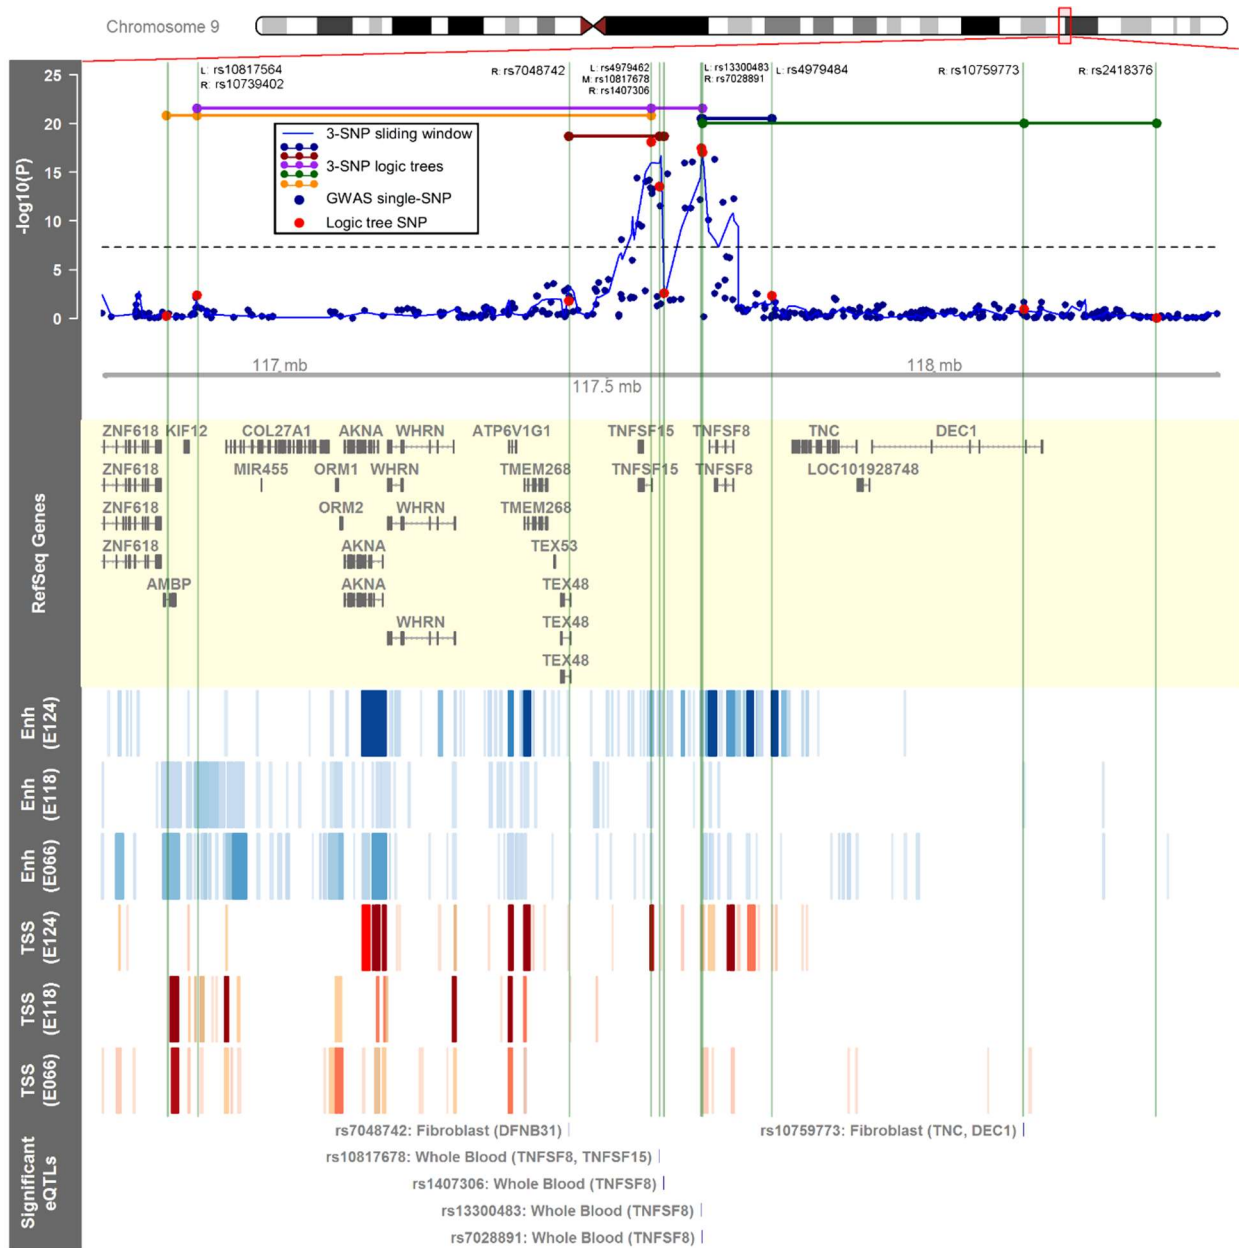

### Supplementary Figure S3:

Visualization of the region surrounding the five replicated 3-SNP haplotype logic trees in chromosome 9 (chr9:116727079-118438852, hg19; corresponds to the red rectangle in the chromosomal ideogram). The top data track shows single-SNP association results and haplotype association results using benchmark (“3-SNP sliding window”) and proposed (“3-SNP logic tree”) methods for the selected genomic region. The annotation tracks beneath show RefSeq genes, a heatmap corresponding to Roadmap Epigenomics<sup>21</sup> H3K4me1 (Enh or enhancer) and H3K4me3 (TSS or promoter) ChIP-seq peaks in monocytes (E124), hepatocellular carcinoma cells or HepG2 (E118), and liver cells (E066), and all significant eQTLs associated with SNPs in replicated haplotypes in blood, liver, and fibroblast cell types (GTEx Consortium<sup>20</sup>).

**Supplementary Table S1: Summary of discovery and replication analysis results for the 49 replicated 3-SNP haplotypes**

| Chr | 3-SNP haplotype tree                                  | RefSeq gene windows with 3-SNP haplotype                                                                                                            | # SNPs in gene windows | DISCOVERY (N=1,937)                   |       |                       | REPLICATION (N=949) |                       | COMBINED (N=2,886) |                       |                                     |                                   |                                     |  |
|-----|-------------------------------------------------------|-----------------------------------------------------------------------------------------------------------------------------------------------------|------------------------|---------------------------------------|-------|-----------------------|---------------------|-----------------------|--------------------|-----------------------|-------------------------------------|-----------------------------------|-------------------------------------|--|
|     |                                                       |                                                                                                                                                     |                        | Permutation-based selection statistic | OR    | P                     | OR                  | P                     | OR                 | P                     | # with 0 haplotype copies (% cases) | # with 1 haplotype copy (% cases) | # with 2 haplotype copies (% cases) |  |
| 6   | ((rs3117106=C) and ((rs206018=G) or (rs9501179=A)))   | <i>SLC44A4; EHMT2</i>                                                                                                                               | 148-158                | -82.148                               | 0.169 | 3.3x10 <sup>-17</sup> | 0.257               | 2.7x10 <sup>-7</sup>  | 0.196              | 3.0x10 <sup>-23</sup> | 2,609 (51.2%)                       | 264 (17.4%)                       | 13 (0.0%)                           |  |
| 6   | ((rs3129881=C) or ((rs375244=A) and (rs3132947=G)))   | <i>CFB; NELFE; C2; C2-AS1</i>                                                                                                                       | 153-163                | -69.730                               | 4.937 | 1.8x10 <sup>-20</sup> | 2.324               | 1.6x10 <sup>-5</sup>  | 3.665              | 2.3x10 <sup>-24</sup> | 17 (17.6%)                          | 360 (21.7%)                       | 2,509 (51.8%)                       |  |
| 6   | ((rs35372932=T) and (rs9269190=C)) or (rs9270493=C)   | <i>TNXB</i>                                                                                                                                         | 157                    | -58.438                               | 0.325 | 4.3x10 <sup>-25</sup> | 0.451               | 1.7x10 <sup>-8</sup>  | 0.365              | 9.6x10 <sup>-32</sup> | 2,162 (54.3%)                       | 656 (29.7%)                       | 68 (16.2%)                          |  |
| 6   | ((rs9268977=T) or ((rs3135395=T) or (rs550513=T)))    | <i>SKIV2L</i>                                                                                                                                       | 159                    | -57.402                               | 3.741 | 1.7x10 <sup>-21</sup> | 2.991               | 1.0x10 <sup>-9</sup>  | 3.448              | 1.2x10 <sup>-29</sup> | 43 (16.3%)                          | 439 (23.0%)                       | 2,404 (53.0%)                       |  |
| 6   | ((rs9268634=G) or (rs35344500=C)) and (rs9275175=G)   | <i>NOTCH4; GPSM3</i>                                                                                                                                | 177-193                | -47.911                               | 0.417 | 6.1x10 <sup>-27</sup> | 0.500               | 6.8x10 <sup>-11</sup> | 0.448              | 1.3x10 <sup>-35</sup> | 1,606 (57.8%)                       | 1,069 (38.2%)                     | 211 (21.3%)                         |  |
| 6   | ((rs9268831=T) or (rs9269190=T)) or (rs9270652=C)     | <i>ATF6B; FKBPL; PPT2; PPT2-EGFL8; AGPAT1</i>                                                                                                       | 158-169                | -43.565                               | 3.640 | 3.2x10 <sup>-23</sup> | 2.315               | 1.9x10 <sup>-7</sup>  | 3.075              | 7.3x10 <sup>-29</sup> | 46 (15.2%)                          | 496 (26.0%)                       | 2,344 (53.1%)                       |  |
| 6   | ((rs3132947=G) or ((rs9501179=G) and (rs41546114=C))) | <i>C6orf48; SNORD48</i>                                                                                                                             | 162                    | -42.196                               | 6.316 | 1.2x10 <sup>-16</sup> | 3.533               | 7.9x10 <sup>-7</sup>  | 5.030              | 2.4x10 <sup>-22</sup> | 11 (0.0%)                           | 257 (17.5%)                       | 2,618 (51.0%)                       |  |
| 6   | ((rs9268831=T) or ((rs2395194=G) or (rs387608=A)))    | <i>STK19</i>                                                                                                                                        | 160                    | -38.720                               | 3.869 | 8.0x10 <sup>-22</sup> | 3.169               | 4.3x10 <sup>-10</sup> | 3.601              | 2.2x10 <sup>-30</sup> | 42 (16.7%)                          | 431 (22.0%)                       | 2,413 (53.0%)                       |  |
| 6   | ((rs3132947=G) or ((rs9268014=C) and (rs41546114=C))) | <i>MSH5</i>                                                                                                                                         | 181                    | -38.294                               | 6.221 | 5.3x10 <sup>-17</sup> | 3.533               | 7.9x10 <sup>-7</sup>  | 5.012              | 1.0x10 <sup>-22</sup> | 12 (0.0%)                           | 261 (17.6%)                       | 2,613 (51.1%)                       |  |
| 6   | ((rs3132947=G) or ((rs9268055=T) and (rs41546114=C))) | <i>MSH5-SAPCD1</i>                                                                                                                                  | 181                    | -38.294                               | 6.221 | 5.3x10 <sup>-17</sup> | 3.533               | 7.9x10 <sup>-7</sup>  | 5.012              | 1.0x10 <sup>-22</sup> | 12 (0.0%)                           | 261 (17.6%)                       | 2,613 (51.1%)                       |  |
| 6   | ((rs241437=G) or (rs3129299=C)) or (rs9276909=C)      | <i>PFDN6; WDR46; VPS52; DAXX; RPS18; HCG25</i>                                                                                                      | 125-139                | -37.551                               | 6.468 | 5.0x10 <sup>-16</sup> | 2.912               | 2.2x10 <sup>-5</sup>  | 4.716              | 1.8x10 <sup>-20</sup> | 16 (0.0%)                           | 237 (18.6%)                       | 2,633 (50.8%)                       |  |
| 6   | ((rs2395194=G) and (rs16870908=G)) or (rs9268831=T)   | <i>HLA-DMA; HLA-DQB2; LOC100294145; C6orf10; HLA-DOB; TAP2; HLA-DQA2; HCG23; HLA-DMB; BTNL2; PSMB9; TAP1; HLA-DQA1; HLA-DQB1; HLA-DRA; HLA-DRB6</i> | 197-283                | -35.650                               | 2.995 | 1.7x10 <sup>-25</sup> | 2.292               | 4.4x10 <sup>-9</sup>  | 2.732              | 5.9x10 <sup>-33</sup> | 72 (11.1%)                          | 690 (31.2%)                       | 1,124 (54.5%)                       |  |
| 6   | ((rs9268213=A) and (rs41546114=C)) or (rs3132947=G)   | <i>HSPA1L</i>                                                                                                                                       | 158                    | -35.026                               | 6.221 | 5.3x10 <sup>-17</sup> | 3.533               | 7.9x10 <sup>-7</sup>  | 5.012              | 1.0x10 <sup>-22</sup> | 12 (0.0%)                           | 261 (17.6%)                       | 2,613 (51.1%)                       |  |
| 6   | ((rs4538748=C) or (rs2064476=G)) and (rs35344500=A)   | <i>HLA-DOA; BRD2; HLA-DPB2; HLA-DPA1; HLA-DPB1</i>                                                                                                  | 187-192                | -34.656                               | 2.406 | 9.3x10 <sup>-26</sup> | 2.136               | 5.4x10 <sup>-11</sup> | 2.313              | 3.3x10 <sup>-35</sup> | 173 (20.8%)                         | 941 (35.8%)                       | 1,772 (56.9%)                       |  |
| 6   | ((rs2244027=A) or (rs2242665=C)) or (rs2071591=G)     | <i>MICB; LY6G5B; PRRC2A; ATP6V1G2-DDX39B; DDX39B; MCCD1; NFKBIL1; AIF1; ATP6V1G2; DDX39B-AS1; LST1; LTA; APOM; CSNK2B; GPANK1; BAG6; HCP5; MICA</i> | 152-203                | -27.403                               | 2.943 | 3.4x10 <sup>-19</sup> | 2.659               | 9.3x10 <sup>-8</sup>  | 2.873              | 8.7x10 <sup>-26</sup> | 33 (21.2%)                          | 509 (26.7%)                       | 2,344 (52.8%)                       |  |
| 6   | ((rs9296088=A) and (rs12207818=C)) and (rs181997=A)   | <i>KIFC1; SYNGAP1</i>                                                                                                                               | 118-123                | -26.700                               | 0.142 | 1.3x10 <sup>-14</sup> | 0.377               | 6.1x10 <sup>-4</sup>  | 0.204              | 6.6x10 <sup>-18</sup> | 2,671 (50.4%)                       | 205 (17.6%)                       | 10 (0.0%)                           |  |
| 6   | ((rs2071287=C) and (rs3094596=C)) or (rs185819=C)     | <i>ABHD16A</i>                                                                                                                                      | 152                    | -22.999                               | 3.720 | 6.5x10 <sup>-18</sup> | 2.882               | 3.2x10 <sup>-8</sup>  | 3.370              | 1.5x10 <sup>-24</sup> | 29 (3.4%)                           | 379 (25.1%)                       | 2,478 (51.9%)                       |  |
| 6   | ((rs3132947=T) and ((rs404860=C) or (rs41546114=T)))  | <i>C6orf25</i>                                                                                                                                      | 169                    | -21.846                               | 0.186 | 8.2x10 <sup>-17</sup> | 0.382               | 7.7x10 <sup>-6</sup>  | 0.253              | 3.2x10 <sup>-21</sup> | 2,584 (51.0%)                       | 288 (21.5%)                       | 14 (0.0%)                           |  |
| 6   | ((rs11754586=T) or ((rs3131932=G) or (rs9262537=G)))  | <i>PPP1R10; ABCF1; ATAT1</i>                                                                                                                        | 138-148                | -21.366                               | 3.889 | 1.0x10 <sup>-15</sup> | 2.396               | 2.6x10 <sup>-5</sup>  | 3.241              | 1.8x10 <sup>-19</sup> | 13 (7.7%)                           | 327 (24.5%)                       | 2,546 (51.1%)                       |  |

| Chr | 3-SNP haplotype tree                                             | RefSeq gene windows with 3-SNP haplotype                                                      | # SNPs in gene windows | DISCOVERY (N=1,937)                   |       |                       | REPLICATION (N=949) |                      | COMBINED (N=2,886) |                       |                                     |                                   |                                     |  |
|-----|------------------------------------------------------------------|-----------------------------------------------------------------------------------------------|------------------------|---------------------------------------|-------|-----------------------|---------------------|----------------------|--------------------|-----------------------|-------------------------------------|-----------------------------------|-------------------------------------|--|
|     |                                                                  |                                                                                               |                        | Permutation-based selection statistic | OR    | P                     | OR                  | P                    | OR                 | P                     | # with 0 haplotype copies (% cases) | # with 1 haplotype copy (% cases) | # with 2 haplotype copies (% cases) |  |
| 6   | ((rs10947251=A) or (rs41546114=T)) and (rs3132947=T)             | <i>VAR5</i>                                                                                   | 173                    | -20.943                               | 0.166 | 1.8x10 <sup>-16</sup> | 0.278               | 5.4x10 <sup>-7</sup> | 0.203              | 2.8x10 <sup>-22</sup> | 2,616 (51.0%)                       | 258 (17.8%)                       | 12 (0.0%)                           |  |
| 6   | ((rs3132947=G) or (rs9266632=G)) or (rs185819=C)                 | <i>LY6G6E</i>                                                                                 | 154                    | -20.783                               | 5.008 | 3.8x10 <sup>-17</sup> | 3.426               | 1.0x10 <sup>-7</sup> | 4.321              | 2.0x10 <sup>-23</sup> | 14 (0.0%)                           | 298 (20.1%)                       | 2,574 (51.3%)                       |  |
| 6   | (rs805273=A) and ((rs805267=G) or (rs9266774=T))                 | <i>HCG27</i>                                                                                  | 222                    | -20.015                               | 0.229 | 8.2x10 <sup>-17</sup> | 0.337               | 7.2x10 <sup>-7</sup> | 0.264              | 3.1x10 <sup>-22</sup> | 2,555 (51.3%)                       | 317 (22.4%)                       | 14 (0.0%)                           |  |
| 6   | (rs3828901=A) or ((rs707921=A) and (rs9266774=T))                | <i>CCHCR1; TCF19</i>                                                                          | 222                    | -19.687                               | 0.231 | 6.9x10 <sup>-17</sup> | 0.382               | 6.0x10 <sup>-6</sup> | 0.279              | 2.5x10 <sup>-21</sup> | 2,551 (51.2%)                       | 322 (23.3%)                       | 13 (0.0%)                           |  |
| 6   | (rs3828901=G) and ((rs805268=A) or (rs9266774=C))                | <i>POU5F1</i>                                                                                 | 222                    | -19.444                               | 4.354 | 1.1x10 <sup>-16</sup> | 2.618               | 6.9x10 <sup>-6</sup> | 3.586              | 4.4x10 <sup>-21</sup> | 12 (0.0%)                           | 319 (23.2%)                       | 2,555 (51.2%)                       |  |
| 6   | (rs3828901=A) or ((rs3828919=A) and (rs2523497=T))               | <i>MUC22</i>                                                                                  | 219                    | -19.050                               | 0.231 | 4.2x10 <sup>-17</sup> | 0.479               | 1.6x10 <sup>-4</sup> | 0.313              | 9.0x10 <sup>-20</sup> | 2,531 (51.1%)                       | 345 (25.2%)                       | 10 (0.0%)                           |  |
| 6   | (rs707922=G) or ((rs1046089=A) and (rs9266774=C))                | <i>PSORS1C3</i>                                                                               | 222                    | -17.984                               | 4.314 | 1.6x10 <sup>-16</sup> | 2.967               | 7.2x10 <sup>-7</sup> | 3.748              | 6.2x10 <sup>-22</sup> | 14 (0.0%)                           | 315 (22.5%)                       | 2,557 (51.2%)                       |  |
| 6   | ((rs3131932=G) or (rs28360042=C)) or (rs885950=C)                | <i>NRM; MDC1; MDC1-AS1; DHX16; PPP1R18; TUBB; FLOT1; IER3; DPCR1; DDR1; GTF2H4; LINC00243</i> | 146-211                | -17.890                               | 3.907 | 7.4x10 <sup>-16</sup> | 2.650               | 2.3x10 <sup>-6</sup> | 3.356              | 1.1x10 <sup>-20</sup> | 14 (0.0%)                           | 334 (24.6%)                       | 2,538 (51.2%)                       |  |
| 6   | ((rs9266774=T) and (rs2255741=A)) or (rs3828901=A)               | <i>PSORS1C2</i>                                                                               | 221                    | -17.684                               | 0.234 | 1.4x10 <sup>-16</sup> | 0.371               | 3.4x10 <sup>-6</sup> | 0.279              | 2.6x10 <sup>-21</sup> | 2,551 (51.2%)                       | 323 (23.2%)                       | 12 (0.0%)                           |  |
| 6   | (rs3749946=A) and ((rs2517506=T) and (rs7741091=A))              | <i>MUC21</i>                                                                                  | 209                    | -17.342                               | 0.234 | 3.1x10 <sup>-16</sup> | 0.394               | 9.8x10 <sup>-6</sup> | 0.287              | 1.9x10 <sup>-20</sup> | 2,554 (51.1%)                       | 322 (23.6%)                       | 10 (0.0%)                           |  |
| 6   | (rs3828901=G) and ((rs12110785=T) or (rs2523644=T))              | <i>PSORS1C1; HCG22</i>                                                                        | 218-223                | -15.815                               | 4.572 | 2.9x10 <sup>-16</sup> | 2.427               | 3.0x10 <sup>-5</sup> | 3.544              | 6.3x10 <sup>-20</sup> | 10 (0.0%)                           | 306 (23.2%)                       | 2,570 (51.0%)                       |  |
| 6   | ((rs2239888=T) or (rs3134769=C)) and (rs3828901=G)               | <i>CDSN</i>                                                                                   | 221                    | -14.656                               | 4.240 | 1.2x10 <sup>-16</sup> | 2.578               | 7.7x10 <sup>-6</sup> | 3.510              | 5.5x10 <sup>-21</sup> | 11 (0.0%)                           | 327 (23.5%)                       | 2,548 (51.2%)                       |  |
| 6   | (rs2517681=T) or ((rs4148248=C) and (rs2735078=A))               | <i>TRIM10; TRIM26; TRIM31; TRIM31-AS1; TRIM40; TRIM15</i>                                     | 93-96                  | -13.047                               | 3.254 | 5.1x10 <sup>-13</sup> | 3.065               | 1.1x10 <sup>-6</sup> | 3.196              | 2.6x10 <sup>-18</sup> | 13 (7.7%)                           | 309 (24.6%)                       | 2,564 (50.9%)                       |  |
| 6   | (rs17195733=G) or ((rs13201129=C) and (rs1737069=T))             | <i>HLA-L</i>                                                                                  | 93                     | -13.034                               | 0.361 | 2.0x10 <sup>-14</sup> | 0.364               | 2.2x10 <sup>-7</sup> | 0.360              | 1.8x10 <sup>-20</sup> | 2,444 (51.7%)                       | 419 (27.2%)                       | 23 (17.4%)                          |  |
| 6   | (rs3130785=T) and ((rs9261301=G) or (rs1264570=C))               | <i>RPP21</i>                                                                                  | 100                    | -12.876                               | 0.291 | 6.0x10 <sup>-14</sup> | 0.441               | 6.7x10 <sup>-5</sup> | 0.340              | 2.7x10 <sup>-17</sup> | 2,549 (50.8%)                       | 323 (25.7%)                       | 14 (14.3%)                          |  |
| 6   | (rs2517681=C) and ((rs3130785=T) or (rs2735078=G))               | <i>TRIM39; TRIM39-RPP21</i>                                                                   | 103                    | -11.587                               | 0.289 | 4.3x10 <sup>-14</sup> | 0.376               | 5.4x10 <sup>-6</sup> | 0.317              | 1.2x10 <sup>-18</sup> | 2,552 (51.0%)                       | 320 (24.4%)                       | 14 (14.3%)                          |  |
| 6   | ((rs1345229=A) or (rs1233387=T)) or (rs1003581=G)                | <i>HCG4; LOC554223; HLA-F; HLA-G</i>                                                          | 113-117                | -11.537                               | 3.168 | 6.9x10 <sup>-13</sup> | 2.885               | 1.7x10 <sup>-6</sup> | 3.070              | 5.4x10 <sup>-18</sup> | 14 (7.1%)                           | 318 (25.5%)                       | 2,554 (50.9%)                       |  |
| 6   | ((rs4713429=G) or (rs12110785=T)) or (rs3131932=G)               | <i>GNL1; PRR3</i>                                                                             | 139                    | -11.517                               | 3.661 | 8.4x10 <sup>-16</sup> | 2.344               | 2.0x10 <sup>-5</sup> | 3.093              | 1.0x10 <sup>-19</sup> | 17 (0.0%)                           | 346 (26.3%)                       | 2,523 (51.1%)                       |  |
| 6   | ((rs1003581=G) and (rs16894681=T)) or (rs1233387=T) <sup>a</sup> | <i>OR2H2; UBD; OR10C1; OR11A1; OR12D2; OR12D3; OR5V1; OR2H1; GABBR1; OR2J2; OR2J3</i>         | 78-110                 | -14.375                               | 2.697 | 6.4x10 <sup>-13</sup> | 2.255               | 1.9x10 <sup>-5</sup> | 2.541              | 5.5x10 <sup>-17</sup> | 18 (5.6%)                           | 401 (29.9%)                       | 2,467 (51.1%)                       |  |
| 6   | ((rs2281043=T) or (rs7751451=G)) and (rs1635=A) <sup>a</sup>     | <i>ZSCAN12; ZKSCAN3; PGBD1; ZSCAN31; ZSCAN23; ZBED9; GPX5; GPX6</i>                           | 50-53                  | -14.306                               | 0.377 | 2.7x10 <sup>-11</sup> | 0.360               | 1.7x10 <sup>-6</sup> | 0.371              | 2.1x10 <sup>-16</sup> | 2,527 (50.8%)                       | 341 (27.9%)                       | 18 (11.1%)                          |  |

| Chr | 3-SNP haplotype tree                                               | RefSeq gene windows with 3-SNP haplotype                                                                                                                  | # SNPs in gene windows | DISCOVERY (N=1,937)                   |       |                       | REPLICATION (N=949) |                      | COMBINED (N=2,886) |                       |                                     |                                   |                                     |  |
|-----|--------------------------------------------------------------------|-----------------------------------------------------------------------------------------------------------------------------------------------------------|------------------------|---------------------------------------|-------|-----------------------|---------------------|----------------------|--------------------|-----------------------|-------------------------------------|-----------------------------------|-------------------------------------|--|
|     |                                                                    |                                                                                                                                                           |                        | Permutation-based selection statistic | OR    | P                     | OR                  | P                    | OR                 | P                     | # with 0 haplotype copies (% cases) | # with 1 haplotype copy (% cases) | # with 2 haplotype copies (% cases) |  |
| 6   | ((rs3117192=C) or (rs16894216=T)) and (rs7773193=T) <sup>a</sup>   | <i>ZNF311</i> ; <i>LINC01556</i> ; <i>OR2W1</i>                                                                                                           | 61-67                  | -14.047                               | 2.709 | 2.6x10 <sup>-11</sup> | 2.728               | 1.5x10 <sup>-6</sup> | 2.711              | 2.0x10 <sup>-16</sup> | 17 (11.8%)                          | 340 (27.6%)                       | 2,529 (50.8%)                       |  |
| 6   | (rs9295704=C) and ((rs2451752=A) and (rs2575174=C)) <sup>a</sup>   | <i>BTN3A2</i> ; <i>BTN2A2</i>                                                                                                                             | 46-52                  | -12.263                               | 0.362 | 1.7x10 <sup>-10</sup> | 0.374               | 1.3x10 <sup>-5</sup> | 0.365              | 8.9x10 <sup>-15</sup> | 2,571 (50.4%)                       | 304 (27.3%)                       | 11 (9.1%)                           |  |
| 6   | (rs6939576=G) or ((rs2859365=G) or (rs6930033=A)) <sup>a</sup>     | <i>TRIM27</i>                                                                                                                                             | 64                     | -12.215                               | 2.681 | 9.9x10 <sup>-11</sup> | 3.120               | 3.3x10 <sup>-7</sup> | 2.820              | 1.7x10 <sup>-16</sup> | 20 (15.0%)                          | 312 (26.3%)                       | 2,554 (50.7%)                       |  |
| 6   | (rs7773193=C) or ((rs17280818=T) and (rs2394100=T)) <sup>a</sup>   | <i>NKAPL</i> ; <i>ZSCAN26</i> ; <i>ZKSCAN4</i> ; <i>ZSCAN9</i>                                                                                            | 52-53                  | -11.424                               | 0.383 | 4.3x10 <sup>-11</sup> | 0.383               | 3.2x10 <sup>-6</sup> | 0.382              | 6.3x10 <sup>-16</sup> | 2,524 (50.8%)                       | 342 (28.7%)                       | 20 (10.0%)                          |  |
| 7   | ((rs12671658=T) or (rs12702656=A)) and (rs11768586=G) <sup>a</sup> | <i>GLCC11</i> ; <i>LOC100505921</i> ; <i>ICA1</i> ; <i>COL28A1</i> ; <i>MIOS</i> ; <i>RPA3</i> ; <i>LOC100505938</i> ; <i>UMAD1</i> ; <i>LOC101927391</i> | 204-292                | -16.424                               | 0.040 | 8.7x10 <sup>-8</sup>  | 0.112               | 3.6x10 <sup>-4</sup> | 0.066              | 3.9x10 <sup>-9</sup>  | 2,802 (49.1%)                       | 84 (6.0%)                         | 0 (NA)                              |  |
| 9   | (rs4979484=C) or ((rs13300483=T) and (rs7028891=G)) <sup>a</sup>   | <i>LOC100505478</i> ; <i>TNFSF15</i> ; <i>C9orf91</i> ; <i>TNFSF8</i>                                                                                     | 121-156                | -28.431                               | 1.746 | 4.2x10 <sup>-17</sup> | 1.528               | 8.6x10 <sup>-6</sup> | 1.672              | 3.0x10 <sup>-21</sup> | 775 (35.4%)                         | 1,434 (48.7%)                     | 677 (60.4%)                         |  |
| 9   | (rs7028891=G) and ((rs4979462=T) or (rs10739402=T)) <sup>a</sup>   | <i>ATP6V1G1</i> ; <i>AKNA</i> ; <i>DFNB31</i>                                                                                                             | 116-133                | -26.160                               | 1.749 | 3.1x10 <sup>-17</sup> | 1.597               | 9.8x10 <sup>-7</sup> | 1.696              | 2.7x10 <sup>-22</sup> | 870 (36.0%)                         | 1,413 (49.3%)                     | 603 (61.7%)                         |  |
| 9   | (rs7028891=A) and ((rs2418376=A) or (rs10759773=G)) <sup>a</sup>   | <i>DEC1</i> ; <i>TNC</i> ; <i>LOC101928748</i>                                                                                                            | 153-189                | -22.728                               | 0.569 | 2.5x10 <sup>-17</sup> | 0.674               | 2.3x10 <sup>-5</sup> | 0.604              | 9.3x10 <sup>-21</sup> | 873 (59.1%)                         | 1,398 (46.7%)                     | 615 (34.5%)                         |  |
| 9   | (rs10817678=G) or ((rs1407306=T) and (rs7048742=A)) <sup>a</sup>   | <i>ORM2</i>                                                                                                                                               | 111                    | -21.730                               | 0.586 | 6.6x10 <sup>-16</sup> | 0.672               | 3.2x10 <sup>-5</sup> | 0.613              | 2.1x10 <sup>-19</sup> | 960 (57.7%)                         | 1,380 (46.7%)                     | 546 (33.5%)                         |  |
| 9   | (rs4979462=T) or ((rs10739402=T) and (rs10817564=C)) <sup>a</sup>  | <i>COL27A1</i>                                                                                                                                            | 128                    | -12.015                               | 1.687 | 4.7x10 <sup>-15</sup> | 1.699               | 3.8x10 <sup>-8</sup> | 1.687              | 1.5x10 <sup>-21</sup> | 532 (33.1%)                         | 1,390 (46.0%)                     | 964 (58.6%)                         |  |

<sup>a</sup> Contains no HLA region SNPs

Abbreviations: #, number

**Supplementary Table S2: Component single SNPs and SNP pair haplotype effects for replicated 3-SNP haplotypes**

| Chr | 3-SNP haplotype tree                                  | Haplotype OR <sup>a</sup> | Haplotype P <sup>a</sup> | Single SNP                           | Alt. allele | SNP OR <sup>b</sup>     | SNP P <sup>b</sup>                                                     | Component haplotype pair                                                                  | Pair OR <sup>c</sup>    | Pair P <sup>c</sup>                                                     |
|-----|-------------------------------------------------------|---------------------------|--------------------------|--------------------------------------|-------------|-------------------------|------------------------------------------------------------------------|-------------------------------------------------------------------------------------------|-------------------------|-------------------------------------------------------------------------|
| 6   | ((rs3117106=C) and ((rs206018=G) or (rs9501179=A)))   | 0.196                     | 3.0x10 <sup>-23</sup>    | rs3117106<br>rs206018<br>rs9501179   | C<br>G<br>A | 0.433<br>0.924<br>0.903 | 1.2x10 <sup>-20</sup><br>0.276<br>0.117                                | rs3117106=C and rs206018=G<br>rs3117106=C and rs9501179=A                                 | 0.154<br>0.203          | 0.002<br>5.2x10 <sup>-21</sup>                                          |
| 6   | ((rs3129881=C) or ((rs375244=A) and (rs3132947=G)))   | 3.665                     | 2.3x10 <sup>-24</sup>    | rs3129881<br>rs375244<br>rs3132947   | C<br>A<br>G | 2.227<br>0.980<br>2.117 | 1.8x10 <sup>-23</sup><br>0.715<br>1.4x10 <sup>-16</sup>                | rs375244=A and rs3132947=G                                                                | 1.238                   | 7.9x10 <sup>-5</sup>                                                    |
| 6   | ((rs35372932=T) and (rs9269190=C)) or (rs9270493=C)   | 0.365                     | 9.6x10 <sup>-32</sup>    | rs35372932<br>rs9269190<br>rs9270493 | T<br>C<br>C | 1.054<br>0.798<br>0.488 | 0.399<br>1.3x10 <sup>-4</sup><br>8.0x10 <sup>-11</sup>                 | rs35372932=T and rs9269190=C                                                              | 0.313                   | 8.7x10 <sup>-21</sup>                                                   |
| 6   | ((rs9268977=T) or ((rs3135395=T) or (rs550513=T)))    | 3.448                     | 1.2x10 <sup>-29</sup>    | rs9268977<br>rs3135395<br>rs550513   | T<br>T<br>T | 1.493<br>1.149<br>0.858 | 2.1x10 <sup>-11</sup><br>0.010<br>0.112                                | rs9268977=T or rs3135395=T<br>rs9268977=T or rs550513=T<br>rs3135395=T or rs550513=T      | 3.136<br>1.494<br>1.132 | 3.8x10 <sup>-29</sup><br>4.2x10 <sup>-11</sup><br>0.019                 |
| 6   | ((rs9268634=G) or (rs35344500=C)) and (rs9275175=G)   | 0.448                     | 1.3x10 <sup>-35</sup>    | rs9268634<br>rs35344500<br>rs9275175 | G<br>C<br>G | 0.750<br>0.497<br>0.579 | 7.5x10 <sup>-8</sup><br>1.2x10 <sup>-9</sup><br>8.3x10 <sup>-24</sup>  | rs9268634=G and rs9275175=G<br>rs35344500=C and rs9275175=G                               | 0.467<br>0.450          | 7.6x10 <sup>-31</sup><br>4.5x10 <sup>-11</sup>                          |
| 6   | ((rs9268831=T) or (rs9269190=T)) or (rs9270652=C)     | 3.075                     | 7.3x10 <sup>-29</sup>    | rs9268831<br>rs9269190<br>rs9270652  | T<br>T<br>C | 1.324<br>1.252<br>1.109 | 1.6x10 <sup>-7</sup><br>1.3x10 <sup>-4</sup><br>0.057                  | rs9268831=T or rs9269190=T<br>rs9268831=T or rs9270652=C<br>rs9269190=T or rs9270652=C    | 1.633<br>1.321<br>1.925 | 2.8x10 <sup>-16</sup><br>2.0x10 <sup>-5</sup><br>1.2x10 <sup>-18</sup>  |
| 6   | ((rs3132947=G) or ((rs9501179=G) and (rs41546114=C))) | 5.030                     | 2.4x10 <sup>-22</sup>    | rs3132947<br>rs9501179<br>rs41546114 | G<br>G<br>C | 2.117<br>1.107<br>0.957 | 1.4x10 <sup>-16</sup><br>0.117<br>0.685                                | rs9501179=G and rs41546114=C                                                              | 1.110                   | 0.086                                                                   |
| 6   | ((rs9268831=T) or ((rs2395194=G) or (rs387608=A)))    | 3.601                     | 2.2x10 <sup>-30</sup>    | rs9268831<br>rs2395194<br>rs387608   | T<br>G<br>A | 1.324<br>1.934<br>1.095 | 1.6x10 <sup>-7</sup><br>8.1x10 <sup>-19</sup><br>0.170                 | rs9268831=T or rs2395194=G<br>rs9268831=T or rs387608=A<br>rs2395194=G or rs387608=A      | 3.107<br>1.302<br>2.106 | 3.5x10 <sup>-29</sup><br>1.2x10 <sup>-6</sup><br>2.7x10 <sup>-20</sup>  |
| 6   | ((rs3132947=G) or ((rs9268014=C) and (rs41546114=C))) | 5.012                     | 1.0x10 <sup>-22</sup>    | rs3132947<br>rs9268014<br>rs41546114 | G<br>C<br>C | 2.117<br>1.119<br>0.957 | 1.4x10 <sup>-16</sup><br>0.078<br>0.685                                | rs9268014=C and rs41546114=C                                                              | 1.120                   | 0.060                                                                   |
| 6   | ((rs3132947=G) or ((rs9268055=T) and (rs41546114=C))) | 5.012                     | 1.0x10 <sup>-22</sup>    | rs3132947<br>rs9268055<br>rs41546114 | G<br>T<br>C | 2.117<br>1.134<br>0.957 | 1.4x10 <sup>-16</sup><br>0.049<br>0.685                                | rs9268055=T and rs41546114=C                                                              | 1.134                   | 0.036                                                                   |
| 6   | ((rs241437=G) or (rs3129299=C)) or (rs9276909=C)      | 4.716                     | 1.8x10 <sup>-20</sup>    | rs241437<br>rs3129299<br>rs9276909   | G<br>C<br>C | 1.441<br>1.225<br>1.438 | 6.1x10 <sup>-12</sup><br>4.9x10 <sup>-4</sup><br>1.7x10 <sup>-8</sup>  | rs241437=G or rs3129299=C<br>rs241437=G or rs9276909=C<br>rs3129299=C or rs9276909=C      | 1.903<br>3.413<br>2.798 | 6.7x10 <sup>-15</sup><br>4.2x10 <sup>-21</sup><br>1.7x10 <sup>-18</sup> |
| 6   | ((rs2395194=G) and (rs16870908=G)) or (rs9268831=T)   | 2.732                     | 5.9x10 <sup>-33</sup>    | rs2395194<br>rs16870908<br>rs9268831 | G<br>G<br>T | 1.934<br>1.514<br>1.324 | 8.1x10 <sup>-19</sup><br>0.001<br>1.6x10 <sup>-7</sup>                 | rs2395194=G and rs16870908=G                                                              | 1.948                   | 5.0x10 <sup>-23</sup>                                                   |
| 6   | ((rs9268213=A) and (rs41546114=C)) or (rs3132947=G)   | 5.012                     | 1.0x10 <sup>-22</sup>    | rs9268213<br>rs41546114<br>rs3132947 | A<br>C<br>G | 1.129<br>0.957<br>2.117 | 0.058<br>0.685<br>1.4x10 <sup>-16</sup>                                | rs9268213=A and rs41546114=C                                                              | 1.130                   | 0.042                                                                   |
| 6   | ((rs4538748=C) or (rs2064476=G)) and (rs35344500=A)   | 2.313                     | 3.3x10 <sup>-35</sup>    | rs4538748<br>rs2064476<br>rs35344500 | C<br>G<br>A | 1.519<br>1.521<br>2.013 | 5.1x10 <sup>-13</sup><br>1.8x10 <sup>-14</sup><br>1.2x10 <sup>-9</sup> | rs4538748=C and rs35344500=A<br>rs2064476=G and rs35344500=A                              | 1.723<br>1.623          | 1.1x10 <sup>-22</sup><br>2.0x10 <sup>-19</sup>                          |
| 6   | ((rs2244027=A) or (rs2242665=C)) or (rs2071591=G)     | 2.873                     | 8.7x10 <sup>-26</sup>    | rs2244027<br>rs2242665<br>rs2071591  | A<br>C<br>G | 1.316<br>1.157<br>1.311 | 4.7x10 <sup>-7</sup><br>0.008<br>1.1x10 <sup>-6</sup>                  | rs2244027=A or rs2242665=C<br>rs2244027=A or rs2071591=G<br>rs2242665=C or rs2071591=G    | 1.500<br>1.601<br>1.787 | 7.6x10 <sup>-11</sup><br>2.3x10 <sup>-12</sup><br>5.2x10 <sup>-16</sup> |
| 6   | ((rs9296088=A) and (rs12207818=C)) and (rs181997=A)   | 0.204                     | 6.6x10 <sup>-18</sup>    | rs9296088<br>rs12207818<br>rs181997  | A<br>C<br>A | 0.752<br>0.708<br>0.619 | 6.1x10 <sup>-8</sup><br>1.7x10 <sup>-6</sup><br>3.3x10 <sup>-10</sup>  | rs9296088=A and rs12207818=C<br>rs9296088=A and rs181997=A<br>rs12207818=C and rs181997=A | 0.482<br>0.437<br>0.284 | 1.6x10 <sup>-14</sup><br>9.7x10 <sup>-16</sup><br>1.3x10 <sup>-16</sup> |
| 6   | ((rs2071287=C) and (rs3094596=C)) or (rs185819=C)     | 3.370                     | 1.5x10 <sup>-24</sup>    | rs2071287<br>rs3094596<br>rs185819   | C<br>C<br>C | 1.482<br>2.104<br>1.302 | 7.1x10 <sup>-12</sup><br>2.5x10 <sup>-16</sup><br>4.1x10 <sup>-6</sup> | rs2071287=C and rs3094596=C                                                               | 1.497                   | 9.4x10 <sup>-13</sup>                                                   |



| Chr | 3-SNP haplotype tree                                   | Haplotype OR <sup>a</sup> | Haplotype P <sup>a</sup> | Single SNP                            | Alt. allele | SNP OR <sup>b</sup>     | SNP P <sup>b</sup>                                                    | Component haplotype pair                                                                  | Pair OR <sup>c</sup>    | Pair P <sup>c</sup>                                                    |
|-----|--------------------------------------------------------|---------------------------|--------------------------|---------------------------------------|-------------|-------------------------|-----------------------------------------------------------------------|-------------------------------------------------------------------------------------------|-------------------------|------------------------------------------------------------------------|
| 6   | ((rs3132947=T) and ((rs404860=C) or (rs41546114=T)))   | 0.253                     | 3.2x10 <sup>-21</sup>    | rs3132947<br>rs404860<br>rs41546114   | T<br>C<br>T | 0.472<br>1.115<br>1.045 | 1.4x10 <sup>-16</sup><br>0.036<br>0.685                               | rs3132947=T and rs404860=C<br>rs3132947=T and rs41546114=T                                | 0.261<br>0.333          | 4.0x10 <sup>-20</sup><br>0.055                                         |
| 6   | ((rs11754586=T) or ((rs3131932=G) or (rs9262537=G)))   | 3.241                     | 1.8x10 <sup>-19</sup>    | rs11754586<br>rs3131932<br>rs9262537  | T<br>G<br>G | 1.090<br>1.181<br>1.181 | 0.125<br>0.003<br>0.005                                               | rs11754586=T or rs3131932=G<br>rs11754586=T or rs9262537=G<br>rs3131932=G or rs9262537=G  | 1.205<br>1.232<br>1.885 | 0.002<br>1.1x10 <sup>-4</sup><br>4.2x10 <sup>-13</sup>                 |
| 6   | ((rs10947251=A) or (rs41546114=T)) and (rs3132947=T)   | 0.203                     | 2.8x10 <sup>-22</sup>    | rs10947251<br>rs41546114<br>rs3132947 | A<br>T<br>T | 0.891<br>1.045<br>0.472 | 0.075<br>0.685<br>1.4x10 <sup>-16</sup>                               | rs10947251=A and rs3132947=T<br>rs41546114=T and rs3132947=T                              | 0.199<br>0.333          | 1.5x10 <sup>-21</sup><br>0.055                                         |
| 6   | ((rs3132947=G) or (rs9266632=G)) or (rs185819=C)       | 4.321                     | 2.0x10 <sup>-23</sup>    | rs3132947<br>rs9266632<br>rs185819    | G<br>G<br>C | 2.117<br>1.229<br>1.302 | 1.4x10 <sup>-16</sup><br>0.002<br>4.1x10 <sup>-6</sup>                | rs3132947=G or rs9266632=G<br>rs3132947=G or rs185819=C<br>rs9266632=G or rs185819=C      | 2.253<br>3.733<br>1.338 | 1.9x10 <sup>-17</sup><br>1.2x10 <sup>-22</sup><br>8.1x10 <sup>-7</sup> |
| 6   | ((rs805273=A) and ((rs805267=G) or (rs9266774=T)))     | 0.264                     | 3.1x10 <sup>-22</sup>    | rs805273<br>rs805267<br>rs9266774     | A<br>G<br>T | 0.554<br>1.097<br>0.984 | 1.8x10 <sup>-12</sup><br>0.372<br>0.774                               | rs805273=A and rs805267=G<br>rs805273=A and rs9266774=T                                   | 0.275<br>0.214          | 2.4x10 <sup>-19</sup><br>2.1x10 <sup>-4</sup>                          |
| 6   | ((rs3828901=A) or ((rs707921=A) and (rs9266774=T)))    | 0.279                     | 2.5x10 <sup>-21</sup>    | rs3828901<br>rs707921<br>rs9266774    | A<br>A<br>T | 0.292<br>0.912<br>0.984 | 2.0x10 <sup>-18</sup><br>0.372<br>0.774                               | rs707921=A and rs9266774=T                                                                | 0.201                   | 3.2x10 <sup>-4</sup>                                                   |
| 6   | ((rs3828901=G) and ((rs805268=A) or (rs9266774=C)))    | 3.586                     | 4.4x10 <sup>-21</sup>    | rs3828901<br>rs805268<br>rs9266774    | G<br>A<br>C | 3.429<br>1.085<br>1.016 | 2.0x10 <sup>-18</sup><br>0.466<br>0.774                               | rs3828901=G and rs805268=A<br>rs3828901=G and rs9266774=C                                 | 1.858<br>1.293          | 1.8x10 <sup>-12</sup><br>3.6x10 <sup>-6</sup>                          |
| 6   | ((rs3828901=A) or ((rs3828919=A) and (rs2523497=T)))   | 0.313                     | 9.0x10 <sup>-20</sup>    | rs3828901<br>rs3828919<br>rs2523497   | A<br>A<br>T | 0.292<br>1.028<br>1.064 | 2.0x10 <sup>-18</sup><br>0.667<br>0.234                               | rs3828919=A and rs2523497=T                                                               | 0.535                   | 0.029                                                                  |
| 6   | ((rs707922=G) or ((rs1046089=A) and (rs9266774=C)))    | 3.748                     | 6.2x10 <sup>-22</sup>    | rs707922<br>rs1046089<br>rs9266774    | G<br>A<br>C | 1.794<br>1.059<br>1.016 | 2.9x10 <sup>-12</sup><br>0.306<br>0.774                               | rs1046089=A and rs9266774=C                                                               | 1.173                   | 0.007                                                                  |
| 6   | ((rs3131932=G) or (rs28360042=C)) or (rs885950=C)      | 3.356                     | 1.1x10 <sup>-20</sup>    | rs3131932<br>rs28360042<br>rs885950   | G<br>C<br>C | 1.181<br>1.165<br>1.165 | 0.003<br>0.005<br>0.004                                               | rs3131932=G or rs28360042=C<br>rs3131932=G or rs885950=C<br>rs28360042=C or rs885950=C    | 2.826<br>1.635<br>1.255 | 2.2x10 <sup>-19</sup><br>6.0x10 <sup>-11</sup><br>0.001                |
| 6   | ((rs9266774=T) and (rs2255741=A)) or (rs3828901=A)     | 0.279                     | 2.6x10 <sup>-21</sup>    | rs9266774<br>rs2255741<br>rs3828901   | T<br>A<br>A | 0.984<br>0.904<br>0.292 | 0.774<br>0.370<br>2.0x10 <sup>-18</sup>                               | rs9266774=T and rs2255741=A                                                               | 0.207                   | 4.4x10 <sup>-4</sup>                                                   |
| 6   | ((rs3749946=A) and ((rs2517506=T) and (rs7741091=A)))  | 0.287                     | 1.9x10 <sup>-20</sup>    | rs3749946<br>rs2517506<br>rs7741091   | A<br>T<br>A | 0.774<br>0.921<br>0.852 | 4.9x10 <sup>-5</sup><br>0.157<br>0.004                                | rs3749946=A and rs2517506=T<br>rs3749946=A and rs7741091=A<br>rs2517506=T and rs7741091=A | 0.363<br>0.709<br>0.831 | 7.8x10 <sup>-17</sup><br>6.1x10 <sup>-7</sup><br>4.9x10 <sup>-4</sup>  |
| 6   | ((rs3828901=G) and ((rs12110785=T) or (rs2523644=T)))  | 3.544                     | 6.3x10 <sup>-20</sup>    | rs3828901<br>rs12110785<br>rs2523644  | G<br>T<br>T | 3.429<br>1.315<br>1.243 | 2.0x10 <sup>-18</sup><br>1.3x10 <sup>-5</sup><br>0.022                | rs3828901=G and rs12110785=T<br>rs3828901=G and rs2523644=T                               | 1.322<br>1.876          | 8.1x10 <sup>-6</sup><br>7.0x10 <sup>-15</sup>                          |
| 6   | ((rs2239888=T) or (rs3134769=C)) and (rs3828901=G)     | 3.510                     | 5.5x10 <sup>-21</sup>    | rs2239888<br>rs3134769<br>rs3828901   | T<br>C<br>G | 0.894<br>1.091<br>3.429 | 0.119<br>0.272<br>2.0x10 <sup>-18</sup>                               | rs2239888=T and rs3828901=G<br>rs3134769=C and rs3828901=G                                | 1.278<br>1.578          | 1.8x10 <sup>-4</sup><br>1.4x10 <sup>-10</sup>                          |
| 6   | ((rs2517681=T) or ((rs4148248=C) and (rs2735078=A)))   | 3.196                     | 2.6x10 <sup>-18</sup>    | rs2517681<br>rs4148248<br>rs2735078   | T<br>C<br>A | 0.956<br>2.975<br>1.030 | 0.386<br>1.1x10 <sup>-16</sup><br>0.578                               | rs4148248=C and rs2735078=A                                                               | 1.274                   | 4.4x10 <sup>-6</sup>                                                   |
| 6   | ((rs17195733=G) or ((rs13201129=C) and (rs1737069=T))) | 0.360                     | 1.8x10 <sup>-20</sup>    | rs17195733<br>rs13201129<br>rs1737069 | G<br>C<br>T | 0.333<br>0.879<br>0.728 | 6.0x10 <sup>-17</sup><br>0.049<br>5.1x10 <sup>-7</sup>                | rs13201129=C and rs1737069=T                                                              | 0.480                   | 1.2x10 <sup>-4</sup>                                                   |
| 6   | ((rs3130785=T) and ((rs9261301=G) or (rs1264570=C)))   | 0.340                     | 2.7x10 <sup>-17</sup>    | rs3130785<br>rs9261301<br>rs1264570   | T<br>G<br>C | 0.454<br>1.286<br>0.813 | 8.8x10 <sup>-17</sup><br>7.0x10 <sup>-6</sup><br>1.3x10 <sup>-4</sup> | rs3130785=T and rs9261301=G<br>rs3130785=T and rs1264570=C                                | 0.421<br>0.333          | 0.053<br>3.1x10 <sup>-17</sup>                                         |
| 6   | ((rs2517681=C) and ((rs3130785=T) or (rs2735078=G)))   | 0.317                     | 1.2x10 <sup>-18</sup>    | rs2517681<br>rs3130785<br>rs2735078   | C<br>T<br>G | 1.046<br>0.454<br>0.971 | 0.386<br>8.8x10 <sup>-17</sup><br>0.578                               | rs2517681=C and rs3130785=T<br>rs2517681=C and rs2735078=G                                | 0.330<br>0.154          | 2.9x10 <sup>-17</sup><br>0.014                                         |

| Chr | 3-SNP haplotype tree                                  | Haplotype OR <sup>a</sup> | Haplotype P <sup>a</sup> | Single SNP                             | Alt. allele | SNP OR <sup>b</sup>     | SNP P <sup>b</sup>                                      | Component haplotype pair                                                                  | Pair OR <sup>c</sup>    | Pair P <sup>c</sup>                                                    |
|-----|-------------------------------------------------------|---------------------------|--------------------------|----------------------------------------|-------------|-------------------------|---------------------------------------------------------|-------------------------------------------------------------------------------------------|-------------------------|------------------------------------------------------------------------|
| 6   | ((rs1345229=A) or (rs1233387=T)) or (rs1003581=G)     | 3.070                     | 5.4x10 <sup>-18</sup>    | rs1345229<br>rs1233387<br>rs1003581    | A<br>T<br>G | 1.341<br>1.102<br>1.226 | 0.001<br>0.066<br>1.8x10 <sup>-4</sup>                  | rs1345229=A or rs1233387=T<br>rs1345229=A or rs1003581=G<br>rs1233387=T or rs1003581=G    | 1.159<br>1.293<br>2.653 | 0.006<br>5.1x10 <sup>-6</sup><br>4.6x10 <sup>-16</sup>                 |
| 6   | ((rs4713429=G) or (rs12110785=T)) or (rs3131932=G)    | 3.093                     | 1.0x10 <sup>-19</sup>    | rs4713429<br>rs12110785<br>rs3131932   | G<br>T<br>G | 1.092<br>1.315<br>1.181 | 0.237<br>1.3x10 <sup>-5</sup><br>0.003                  | rs4713429=G or rs12110785=T<br>rs4713429=G or rs3131932=G<br>rs12110785=T or rs3131932=G  | 1.388<br>1.337<br>1.911 | 2.0x10 <sup>-6</sup><br>1.4x10 <sup>-5</sup><br>1.4x10 <sup>-13</sup>  |
| 6   | ((rs1003581=G) and (rs16894681=T)) or (rs1233387=T)   | 2.541                     | 5.5x10 <sup>-17</sup>    | rs1003581<br>rs16894681<br>rs1233387   | G<br>T<br>T | 1.226<br>1.009<br>1.102 | 1.8x10 <sup>-4</sup><br>0.928<br>0.066                  | rs1003581=G and rs16894681=T                                                              | 1.253                   | 2.3x10 <sup>-5</sup>                                                   |
| 6   | ((rs2281043=T) or (rs7751451=G)) and (rs1635=A)       | 0.371                     | 2.1x10 <sup>-16</sup>    | rs2281043<br>rs7751451<br>rs1635       | T<br>G<br>A | 0.746<br>0.974<br>0.801 | 8.7x10 <sup>-5</sup><br>0.789<br>4.5x10 <sup>-5</sup>   | rs2281043=T and rs1635=A<br>rs7751451=G and rs1635=A                                      | 0.358<br>0.472          | 7.5x10 <sup>-15</sup><br>0.008                                         |
| 6   | ((rs3117192=C) or (rs16894216=T)) and (rs7773193=T)   | 2.711                     | 2.0x10 <sup>-16</sup>    | rs3117192<br>rs16894216<br>rs7773193   | C<br>T<br>T | 0.849<br>0.856<br>2.697 | 0.006<br>0.077<br>1.5x10 <sup>-14</sup>                 | rs3117192=C and rs7773193=T<br>rs16894216=T and rs7773193=T                               | 1.080<br>1.310          | 0.177<br>2.2x10 <sup>-4</sup>                                          |
| 6   | (rs9295704=C) and ((rs2451752=A) and (rs2575174=C))   | 0.365                     | 8.9x10 <sup>-15</sup>    | rs9295704<br>rs2451752<br>rs2575174    | C<br>A<br>C | 0.669<br>0.951<br>0.940 | 1.5x10 <sup>-7</sup><br>0.457<br>0.393                  | rs9295704=C and rs2451752=A<br>rs9295704=C and rs2575174=C<br>rs2451752=A and rs2575174=C | 0.399<br>0.638<br>0.933 | 3.2x10 <sup>-14</sup><br>1.2x10 <sup>-7</sup><br>0.228                 |
| 6   | (rs6939576=G) or ((rs2859365=G) or (rs6930033=A))     | 2.820                     | 1.7x10 <sup>-16</sup>    | rs6939576<br>rs2859365<br>rs6930033    | G<br>G<br>A | 1.091<br>1.165<br>1.143 | 0.137<br>0.004<br>0.015                                 | rs6939576=G or rs2859365=G<br>rs6939576=G or rs6930033=A<br>rs2859365=G or rs6930033=A    | 2.265<br>1.759<br>1.435 | 5.4x10 <sup>-14</sup><br>3.2x10 <sup>-10</sup><br>1.0x10 <sup>-6</sup> |
| 6   | (rs7773193=C) or ((rs17280818=T) and (rs2394100=T))   | 0.382                     | 6.3x10 <sup>-16</sup>    | rs7773193<br>rs17280818<br>rs2394100   | C<br>T<br>T | 0.371<br>0.988<br>1.034 | 1.5x10 <sup>-14</sup><br>0.904<br>0.602                 | rs17280818=T and rs2394100=T                                                              | 0.481                   | 0.013                                                                  |
| 7   | ((rs12671658=T) or (rs12702656=A)) and (rs11768586=G) | 0.066                     | 3.9x10 <sup>-9</sup>     | rs12671658<br>rs12702656<br>rs11768586 | T<br>A<br>G | 1.023<br>1.039<br>0.865 | 0.682<br>0.585<br>0.010                                 | rs12671658=T and rs11768586=G<br>rs12702656=A and rs11768586=G                            | 0.104<br>0.000          | 1.4x10 <sup>-6</sup><br>0.953                                          |
| 9   | (rs4979484=C) or ((rs13300483=T) and (rs7028891=G))   | 1.672                     | 3.0x10 <sup>-21</sup>    | rs4979484<br>rs13300483<br>rs7028891   | C<br>T<br>G | 1.365<br>1.584<br>1.574 | 0.005<br>1.4x10 <sup>-17</sup><br>2.8x10 <sup>-17</sup> | rs13300483=T and rs7028891=G                                                              | 1.637                   | 1.2x10 <sup>-19</sup>                                                  |
| 9   | (rs7028891=G) and ((rs4979462=T) or (rs10739402=T))   | 1.696                     | 2.7x10 <sup>-22</sup>    | rs7028891<br>rs4979462<br>rs10739402   | G<br>T<br>T | 1.574<br>1.599<br>1.193 | 2.8x10 <sup>-17</sup><br>2.6x10 <sup>-18</sup><br>0.003 | rs7028891=G and rs4979462=T<br>rs7028891=G and rs10739402=T                               | 1.634<br>1.387          | 1.5x10 <sup>-19</sup><br>1.5x10 <sup>-5</sup>                          |
| 9   | (rs7028891=A) and ((rs2418376=A) or (rs10759773=G))   | 0.604                     | 9.3x10 <sup>-21</sup>    | rs7028891<br>rs2418376<br>rs10759773   | A<br>A<br>G | 0.635<br>1.003<br>0.921 | 2.8x10 <sup>-17</sup><br>0.972<br>0.118                 | rs7028891=A and rs2418376=A<br>rs7028891=A and rs10759773=G                               | 0.628<br>0.735          | 7.5x10 <sup>-18</sup><br>4.5x10 <sup>-7</sup>                          |
| 9   | (rs10817678=G) or ((rs1407306=T) and (rs7048742=A))   | 0.613                     | 2.1x10 <sup>-19</sup>    | rs10817678<br>rs1407306<br>rs7048742   | G<br>T<br>A | 0.652<br>0.785<br>1.166 | 8.3x10 <sup>-14</sup><br>0.003<br>0.014                 | rs1407306=T and rs7048742=A                                                               | 0.710                   | 3.6x10 <sup>-4</sup>                                                   |
| 9   | (rs4979462=T) or ((rs10739402=T) and (rs10817564=C))  | 1.687                     | 1.5x10 <sup>-21</sup>    | rs4979462<br>rs10739402<br>rs10817564  | T<br>T<br>C | 1.599<br>1.193<br>1.034 | 2.6x10 <sup>-18</sup><br>0.003<br>0.526                 | rs10739402=T and rs10817564=C                                                             | 1.258                   | 0.004                                                                  |

<sup>a</sup> 3-SNP haplotype OR and p-value in the combined sample (N=2,886).

<sup>b</sup> Single SNP ORs and p-values, assuming an additive genetic effect model for the specified alternative allele.

<sup>c</sup> 2-SNP haplotype ORs and p-values, assuming an additive genetic effect model for the specified haplotype pattern.

Abbreviations: Alt, alternative.

**Supplementary Table S3: Pre-phasing missingness rates for replicated 3-SNP haplotypes**

|                            | Entire sample<br>(N=2,886) | All controls<br>(N=1,505) | All cases<br>(N=1,381) |
|----------------------------|----------------------------|---------------------------|------------------------|
| Median, proportion missing | 0.0104                     | 0.0113                    | 0.0109                 |
| IQR, proportion missing    | 0.0069                     | 0.0086                    | 0.0080                 |
| Max, proportion missing    | 0.0596                     | 0.0585                    | 0.0608                 |

Per-sample tree missingness was defined as having at least 1 SNP genotype missing among the 3 SNPs constituting the haplotype for a given sample.

**Supplementary Table S4:** Comparison of distribution frequencies for replicated 3-SNP haplotypes in unphased and phased control groups in the Japan-PBC GWAS data and the phased 1000 Genomes Japanese reference panel

| Chr | 3-SNP haplotype tree<br>(tree SNP order: rs1, rs2, rs3) | PBC UNPHASED<br>(controls, N=1,505) |                                         | PBC PHASED<br>(controls, N=1,505) |         |         |       |          |     |          |       |          | 1000 GENOMES, JPT<br>(N=104) |         |         |    |          |    |          |    |          |
|-----|---------------------------------------------------------|-------------------------------------|-----------------------------------------|-----------------------------------|---------|---------|-------|----------|-----|----------|-------|----------|------------------------------|---------|---------|----|----------|----|----------|----|----------|
|     |                                                         | # Homozygous carriers               | # Potential carriers of at least 1 copy | rs1 AF                            | rs2 AF  | rs3 AF  | h0    | % (h0/N) | h1  | % (h1/N) | h2    | % (h2/N) | rs1 AF                       | rs2 AF  | rs3 AF  | h0 | % (h0/N) | h1 | % (h1/N) | h2 | % (h2/N) |
| 6   | ((rs3117106=C) and ((rs206018=G) or (rs9501179=A)))     | 11                                  | 277                                     | C=0.072                           | G=0.152 | A=0.199 | 1,274 | 84.7%    | 218 | 14.5%    | 13    | 0.9%     | C=0.173                      | G=0.159 | A=0.192 | 86 | 82.7%    | 17 | 16.3%    | 1  | 1.0%     |
| 6   | ((rs3129881=C) or ((rs375244=A) and (rs3132947=G)))     | 1,112                               | 1,494                                   | C=0.903                           | A=0.633 | G=0.928 | 14    | 0.9%     | 282 | 18.7%    | 1,209 | 80.3%    | C=0.784                      | A=0.615 | G=0.875 | 3  | 2.9%     | 21 | 20.2%    | 80 | 76.9%    |
| 6   | ((rs35372932=T) and (rs9269190=C)) or (rs9270493=C)     | 36                                  | 755                                     | T=0.243                           | C=0.704 | C=0.047 | 987   | 65.6%    | 461 | 30.6%    | 57    | 3.8%     | T=0.231                      | C=0.697 | C=0.072 | 75 | 72.1%    | 27 | 26.0%    | 2  | 1.9%     |
| 6   | ((rs9268977=T) or ((rs3135395=T) or (rs550513=T)))      | 841                                 | 1,469                                   | T=0.760                           | T=0.407 | T=0.074 | 36    | 2.4%     | 338 | 22.5%    | 1,131 | 75.1%    | T=0.635                      | T=0.389 | T=0.072 | 2  | 1.9%     | 26 | 25.0%    | 76 | 73.1%    |
| 6   | ((rs9268634=G) or (rs35344500=C)) and (rs9275175=G)     | 143                                 | 966                                     | G=0.510                           | C=0.043 | G=0.373 | 678   | 45.0%    | 661 | 43.9%    | 166   | 11.0%    | G=0.615                      | C=0.067 | G=0.476 | 50 | 48.1%    | 44 | 42.3%    | 10 | 9.6%     |
| 6   | ((rs9268831=T) or (rs9269190=T)) or (rs9270652=C)       | 857                                 | 1,466                                   | T=0.579                           | T=0.296 | C=0.653 | 39    | 2.6%     | 367 | 24.4%    | 1,099 | 73.0%    | T=0.500                      | T=0.303 | C=0.630 | NA | NA       | 17 | 16.3%    | 87 | 83.7%    |
| 6   | ((rs3132947=G) or ((rs9501179=G) and (rs41546114=C)))   | 1,247                               | 1,493                                   | G=0.928                           | G=0.801 | C=0.936 | 11    | 0.7%     | 212 | 14.1%    | 1,282 | 85.2%    | G=0.875                      | G=0.808 | C=0.938 | 1  | 1.0%     | 15 | 14.4%    | 88 | 84.6%    |
| 6   | ((rs9268831=T) or ((rs2395194=G) or (rs387608=A)))      | 1,039                               | 1,468                                   | T=0.579                           | G=0.883 | A=0.199 | 35    | 2.3%     | 336 | 22.3%    | 1,134 | 75.3%    | T=0.500                      | G=0.760 | A=0.183 | 2  | 1.9%     | 26 | 25.0%    | 76 | 73.1%    |
| 6   | ((rs3132947=G) or ((rs9268014=C) and (rs41546114=C)))   | 1,240                               | 1,493                                   | G=0.928                           | C=0.790 | C=0.936 | 12    | 0.8%     | 215 | 14.3%    | 1,278 | 84.9%    | G=0.875                      | C=0.798 | C=0.938 | 1  | 1.0%     | 15 | 14.4%    | 88 | 84.6%    |
| 6   | ((rs3132947=G) or ((rs9268055=T) and (rs41546114=C)))   | 1,242                               | 1,493                                   | G=0.928                           | T=0.793 | C=0.936 | 12    | 0.8%     | 215 | 14.3%    | 1,278 | 84.9%    | G=0.875                      | T=0.798 | C=0.938 | 1  | 1.0%     | 15 | 14.4%    | 88 | 84.6%    |
| 6   | ((rs241437=G) or (rs3129299=C)) or (rs9276909=C)        | 1,218                               | 1,489                                   | G=0.593                           | C=0.727 | C=0.808 | 16    | 1.1%     | 193 | 12.8%    | 1,296 | 86.1%    | G=0.500                      | C=0.692 | C=0.798 | 1  | 1.0%     | 13 | 12.5%    | 90 | 86.5%    |
| 6   | ((rs2395194=G) and (rs16870908=G)) or (rs9268831=T)     | 897                                 | 1,455                                   | G=0.883                           | G=0.958 | T=0.579 | 64    | 4.3%     | 475 | 31.6%    | 966   | 64.2%    | G=0.760                      | G=0.947 | T=0.500 | 3  | 2.9%     | 39 | 37.5%    | 62 | 59.6%    |
| 6   | ((rs9268213=A) and (rs41546114=C)) or (rs3132947=G)     | 1,240                               | 1,493                                   | A=0.791                           | C=0.936 | G=0.928 | 12    | 0.8%     | 215 | 14.3%    | 1,278 | 84.9%    | A=0.798                      | C=0.938 | G=0.875 | 1  | 1.0%     | 15 | 14.4%    | 88 | 84.6%    |
| 6   | ((rs4538748=C) or (rs2064476=G)) and (rs35344500=A)     | 670                                 | 1,412                                   | C=0.736                           | G=0.674 | A=0.957 | 137   | 9.1%     | 604 | 40.1%    | 764   | 50.8%    | C=0.601                      | G=0.558 | A=0.933 | 4  | 3.8%     | 48 | 46.2%    | 52 | 50.0%    |
| 6   | ((rs2244027=A) or (rs2242665=C)) or (rs2071591=G)       | 875                                 | 1,478                                   | A=0.632                           | C=0.386 | G=0.668 | 26    | 1.7%     | 373 | 24.8%    | 1,106 | 73.5%    | A=0.587                      | C=0.351 | G=0.615 | 3  | 2.9%     | 21 | 20.2%    | 80 | 76.9%    |
| 6   | ((rs9296088=A) and (rs12207818=C)) and (rs181997=A)     | 9                                   | 209                                     | A=0.539                           | C=0.138 | A=0.110 | 1,326 | 88.1%    | 169 | 11.2%    | 10    | 0.7%     | A=0.630                      | C=0.202 | A=0.159 | 88 | 84.6%    | 16 | 15.4%    | NA | NA       |
| 6   | ((rs2071287=C) and (rs3094596=C)) or (rs185819=C)       | 1,001                               | 1,477                                   | C=0.730                           | C=0.928 | C=0.700 | 28    | 1.9%     | 284 | 18.9%    | 1,193 | 79.3%    | C=0.615                      | C=0.846 | C=0.688 | 2  | 1.9%     | 16 | 15.4%    | 86 | 82.7%    |
| 6   | ((rs3132947=T) and ((rs404860=C) or (rs41546114=T)))    | 14                                  | 295                                     | T=0.072                           | C=0.542 | T=0.064 | 1,265 | 84.1%    | 226 | 15.0%    | 14    | 0.9%     | T=0.125                      | C=0.481 | T=0.062 | 87 | 83.7%    | 16 | 15.4%    | 1  | 1.0%     |
| 6   | ((rs11754586=T) or ((rs3131932=G) or (rs9262537=G)))    | 811                                 | 1,493                                   | T=0.346                           | G=0.703 | G=0.298 | 12    | 0.8%     | 247 | 16.4%    | 1,246 | 82.8%    | T=0.322                      | G=0.702 | G=0.221 | 1  | 1.0%     | 16 | 15.4%    | 87 | 83.7%    |
| 6   | ((rs10947251=A) or (rs41546114=T)) and (rs3132947=T)    | 12                                  | 255                                     | A=0.197                           | T=0.064 | T=0.072 | 1,281 | 85.1%    | 212 | 14.1%    | 12    | 0.8%     | A=0.192                      | T=0.062 | T=0.125 | 88 | 84.6%    | 15 | 14.4%    | 1  | 1.0%     |
| 6   | ((rs3132947=G) or (rs9266632=G)) or (rs185819=C)        | 1,210                               | 1,490                                   | G=0.928                           | G=0.214 | C=0.700 | 14    | 0.9%     | 238 | 15.8%    | 1,253 | 83.3%    | G=0.875                      | G=0.139 | C=0.688 | 2  | 1.9%     | 15 | 14.4%    | 87 | 83.7%    |
| 6   | ((rs805273=A) and ((rs805267=G) or (rs9266774=T)))      | 10                                  | 403                                     | A=0.088                           | G=0.936 | T=0.304 | 1,245 | 82.7%    | 246 | 16.3%    | 14    | 0.9%     | A=0.173                      | G=0.904 | T=0.284 | 89 | 85.6%    | 13 | 12.5%    | 2  | 1.9%     |

| Chr | 3-SNP haplotype tree<br>(tree SNP order: rs1, rs2, rs3) | PBC UNPHASED<br>(controls, N=1,505) |                                         | PBC PHASED<br>(controls, N=1,505) |         |         |       |          |     |          |       |          | 1000 GENOMES, JPT<br>(N=104) |         |         |     |          |    |          |    |          |
|-----|---------------------------------------------------------|-------------------------------------|-----------------------------------------|-----------------------------------|---------|---------|-------|----------|-----|----------|-------|----------|------------------------------|---------|---------|-----|----------|----|----------|----|----------|
|     |                                                         | # Homozygous carriers               | # Potential carriers of at least 1 copy | rs1 AF                            | rs2 AF  | rs3 AF  | h0    | % (h0/N) | h1  | % (h1/N) | h2    | % (h2/N) | rs1 AF                       | rs2 AF  | rs3 AF  | h0  | % (h0/N) | h1 | % (h1/N) | h2 | % (h2/N) |
| 6   | ((rs3828901=A) or ((rs707921=A) and (rs9266774=T)))     | 9                                   | 303                                     | A=0.025                           | A=0.064 | T=0.304 | 1,245 | 82.7%    | 247 | 16.4%    | 13    | 0.9%     | A=0.082                      | A=0.096 | T=0.284 | 88  | 84.6%    | 14 | 13.5%    | 2  | 1.9%     |
| 6   | ((rs3828901=G) and ((rs805268=A) or (rs9266774=C)))     | 1,209                               | 1,494                                   | G=0.975                           | A=0.946 | C=0.696 | 12    | 0.8%     | 245 | 16.3%    | 1,248 | 82.9%    | G=0.918                      | A=0.933 | C=0.716 | 1   | 1.0%     | 15 | 14.4%    | 88 | 84.6%    |
| 6   | ((rs3828901=A) or ((rs3828919=A) and (rs2523497=T)))    | 10                                  | 508                                     | A=0.025                           | A=0.205 | T=0.483 | 1,237 | 82.2%    | 258 | 17.1%    | 10    | 0.7%     | A=0.082                      | A=0.197 | T=0.452 | 86  | 82.7%    | 17 | 16.3%    | 1  | 1.0%     |
| 6   | ((rs707922=G) or ((rs1046089=A) and (rs9266774=C)))     | 1,128                               | 1,493                                   | G=0.912                           | A=0.352 | C=0.696 | 14    | 0.9%     | 244 | 16.2%    | 1,247 | 82.9%    | G=0.827                      | A=0.370 | C=0.716 | 2   | 1.9%     | 13 | 12.5%    | 89 | 85.6%    |
| 6   | ((rs3131932=G) or (rs28360042=C)) or (rs885950=C)       | 1,067                               | 1,491                                   | G=0.703                           | C=0.620 | C=0.395 | 14    | 0.9%     | 252 | 16.7%    | 1,239 | 82.3%    | G=0.702                      | C=0.577 | C=0.317 | 1   | 1.0%     | 17 | 16.3%    | 86 | 82.7%    |
| 6   | ((rs9266774=T) and (rs2255741=A)) or (rs3828901=A)      | 9                                   | 295                                     | T=0.304                           | A=0.054 | A=0.025 | 1,245 | 82.7%    | 248 | 16.5%    | 12    | 0.8%     | T=0.284                      | A=0.067 | A=0.082 | 88  | 84.6%    | 15 | 14.4%    | 1  | 1.0%     |
| 6   | ((rs3749946=A) and ((rs2517506=T) and (rs7741091=A)))   | 10                                  | 520                                     | A=0.198                           | T=0.707 | A=0.638 | 1,249 | 83.0%    | 246 | 16.3%    | 10    | 0.7%     | A=0.250                      | T=0.668 | A=0.678 | 87  | 83.7%    | 16 | 15.4%    | 1  | 1.0%     |
| 6   | ((rs3828901=G) and ((rs12110785=T) or (rs2523644=T)))   | 1,218                               | 1,494                                   | G=0.975                           | T=0.789 | T=0.927 | 10    | 0.7%     | 235 | 15.6%    | 1,260 | 83.7%    | G=0.918                      | T=0.736 | T=0.909 | 1   | 1.0%     | 15 | 14.4%    | 88 | 84.6%    |
| 6   | ((rs2239888=T) or (rs3134769=C)) and (rs3828901=G)      | 1,200                               | 1,494                                   | T=0.834                           | C=0.887 | G=0.975 | 11    | 0.7%     | 250 | 16.6%    | 1,244 | 82.7%    | T=0.856                      | C=0.856 | G=0.918 | 1   | 1.0%     | 17 | 16.3%    | 86 | 82.7%    |
| 6   | ((rs2517681=T) or ((rs4148248=C) and (rs2735078=A)))    | 797                                 | 1,489                                   | T=0.493                           | C=0.971 | A=0.624 | 12    | 0.8%     | 233 | 15.5%    | 1,260 | 83.7%    | T=0.505                      | C=0.913 | A=0.606 | 1   | 1.0%     | 17 | 16.3%    | 86 | 82.7%    |
| 6   | ((rs17195733=G) or ((rs13201129=C) and (rs1737069=T)))  | 13                                  | 396                                     | G=0.029                           | C=0.202 | T=0.192 | 1,181 | 78.5%    | 305 | 20.3%    | 19    | 1.3%     | G=0.091                      | C=0.173 | T=0.255 | 83  | 79.8%    | 20 | 19.2%    | 1  | 1.0%     |
| 6   | ((rs3130785=T) and ((rs9261301=G) or (rs1264570=C)))    | 12                                  | 323                                     | T=0.065                           | G=0.377 | C=0.419 | 1,253 | 83.3%    | 240 | 15.9%    | 12    | 0.8%     | T=0.149                      | G=0.279 | C=0.438 | 85  | 81.7%    | 18 | 17.3%    | 1  | 1.0%     |
| 6   | ((rs2517681=C) and ((rs3130785=T) or (rs2735078=G)))    | 12                                  | 706                                     | C=0.507                           | T=0.065 | G=0.376 | 1,251 | 83.1%    | 242 | 16.1%    | 12    | 0.8%     | C=0.495                      | T=0.149 | G=0.394 | 85  | 81.7%    | 18 | 17.3%    | 1  | 1.0%     |
| 6   | ((rs1345229=A) or (rs1233387=T)) or (rs1003581=G)       | 964                                 | 1,489                                   | A=0.123                           | T=0.561 | G=0.680 | 13    | 0.9%     | 237 | 15.7%    | 1,255 | 83.4%    | A=0.115                      | T=0.519 | G=0.639 | 1   | 1.0%     | 16 | 15.4%    | 87 | 83.7%    |
| 6   | ((rs4713429=G) or (rs12110785=T)) or (rs3131932=G)      | 1,058                               | 1,487                                   | G=0.150                           | T=0.789 | G=0.703 | 17    | 1.1%     | 255 | 16.9%    | 1,233 | 81.9%    | G=0.120                      | T=0.736 | G=0.702 | 1   | 1.0%     | 19 | 18.3%    | 84 | 80.8%    |
| 6   | ((rs1003581=G) and (rs16894681=T)) or (rs1233387=T)     | 901                                 | 1,484                                   | G=0.680                           | T=0.927 | T=0.561 | 17    | 1.1%     | 281 | 18.7%    | 1,207 | 80.2%    | G=0.639                      | T=0.918 | T=0.519 | 1   | 1.0%     | 22 | 21.2%    | 81 | 77.9%    |
| 6   | ((rs2281043=T) or (rs7751451=G)) and (rs1635=A)         | 12                                  | 386                                     | T=0.129                           | G=0.074 | A=0.346 | 1,243 | 82.6%    | 246 | 16.3%    | 16    | 1.1%     | T=0.168                      | G=0.087 | A=0.365 | 91  | 87.5%    | 12 | 11.5%    | 1  | 1.0%     |
| 6   | ((rs3117192=C) or (rs16894216=T)) and (rs7773193=T)     | 1,177                               | 1,488                                   | C=0.719                           | T=0.895 | T=0.969 | 15    | 1.0%     | 246 | 16.3%    | 1,244 | 82.7%    | C=0.716                      | T=0.889 | T=0.918 | 1   | 1.0%     | 18 | 17.3%    | 85 | 81.7%    |
| 6   | ((rs9295704=C) and ((rs2451752=A) and (rs2575174=C)))   | 10                                  | 385                                     | C=0.114                           | A=0.806 | C=0.849 | 1,274 | 84.7%    | 221 | 14.7%    | 10    | 0.7%     | C=0.173                      | A=0.798 | C=0.837 | 84  | 80.8%    | 19 | 18.3%    | 1  | 1.0%     |
| 6   | ((rs6939576=G) or ((rs2859365=G) or (rs6930033=A)))     | 1,141                               | 1,488                                   | G=0.735                           | G=0.544 | A=0.640 | 17    | 1.1%     | 230 | 15.3%    | 1,258 | 83.6%    | G=0.707                      | G=0.524 | A=0.601 | 1   | 1.0%     | 17 | 16.3%    | 86 | 82.7%    |
| 6   | ((rs7773193=C) or ((rs17280818=T) and (rs2394100=T)))   | 14                                  | 300                                     | C=0.031                           | T=0.075 | T=0.209 | 1,243 | 82.6%    | 244 | 16.2%    | 18    | 1.2%     | C=0.082                      | T=0.087 | T=0.212 | 88  | 84.6%    | 15 | 14.4%    | 1  | 1.0%     |
| 7   | ((rs12671658=T) or (rs12702656=A)) and (rs11768586=G)   | 0                                   | 554                                     | T=0.337                           | A=0.175 | G=0.333 | 1,426 | 94.8%    | 79  | 5.2%     | NA    | NA       | T=0.303                      | A=0.173 | G=0.370 | 104 | 100.0%   | NA | NA       | NA | NA       |
| 9   | ((rs4979484=C) or ((rs13300483=T) and (rs7028891=G)))   | 242                                 | 1,008                                   | C=0.071                           | T=0.543 | G=0.568 | 501   | 33.3%    | 736 | 48.9%    | 268   | 17.8%    | C=0.058                      | T=0.438 | G=0.452 | 33  | 31.7%    | 52 | 50.0%    | 19 | 18.3%    |

| Chr | 3-SNP haplotype tree<br>(tree SNP order: rs1, rs2, rs3) | PBC UNPHASED<br>(controls, N=1,505) |                                               | PBC PHASED<br>(controls, N=1,505) |         |         |     |             |     |             |     |             | 1000 GENOMES, JPT<br>(N=104) |         |         |    |             |    |             |    |             |
|-----|---------------------------------------------------------|-------------------------------------|-----------------------------------------------|-----------------------------------|---------|---------|-----|-------------|-----|-------------|-----|-------------|------------------------------|---------|---------|----|-------------|----|-------------|----|-------------|
|     |                                                         | #<br>Homozygous<br>carriers         | # Potential<br>carriers of at<br>least 1 copy | rs1 AF                            | rs2 AF  | rs3 AF  | h0  | %<br>(h0/N) | h1  | %<br>(h1/N) | h2  | %<br>(h2/N) | rs1 AF                       | rs2 AF  | rs3 AF  | h0 | %<br>(h0/N) | h1 | %<br>(h1/N) | h2 | %<br>(h2/N) |
| 9   | (rs7028891=G) and ((rs4979462=T)<br>or (rs10739402=T))  | 221                                 | 982                                           | G=0.568                           | T=0.580 | T=0.292 | 557 | 37.0%       | 717 | 47.6%       | 231 | 15.3%       | G=0.452                      | T=0.495 | T=0.308 | 38 | 36.5%       | 46 | 44.2%       | 20 | 19.2%       |
| 9   | (rs7028891=A) and ((rs2418376=A)<br>or (rs10759773=G))  | 373                                 | 1,179                                         | A=0.432                           | A=0.863 | G=0.458 | 357 | 23.7%       | 745 | 49.5%       | 403 | 26.8%       | A=0.548                      | A=0.851 | G=0.462 | 29 | 27.9%       | 48 | 46.2%       | 27 | 26.0%       |
| 9   | (rs10817678=G) or ((rs1407306=T)<br>and (rs7048742=A))  | 224                                 | 1,137                                         | G=0.292                           | T=0.108 | A=0.774 | 406 | 27.0%       | 736 | 48.9%       | 363 | 24.1%       | G=0.385                      | T=0.101 | A=0.755 | 34 | 32.7%       | 47 | 45.2%       | 23 | 22.1%       |
| 9   | (rs4979462=T) or ((rs10739402=T)<br>and (rs10817564=C)) | 334                                 | 1,205                                         | T=0.580                           | T=0.292 | C=0.565 | 356 | 23.7%       | 750 | 49.8%       | 399 | 26.5%       | T=0.495                      | T=0.308 | C=0.596 | 19 | 18.3%       | 52 | 50.0%       | 33 | 31.7%       |

Abbreviations: rs1 AF, allele frequency (AF) for 1st SNP listed in 3-SNP haplotype; rs2 AF, AF for 2nd SNP in haplotype; rs3 AF, AF for 3rd SNP in haplotype; h0, number (#) carriers of 0 haplotype tree copies; h1, # carriers of 1 haplotype tree copy; h2, # carriers with 2 haplotype tree copies.

**Supplementary Table S5:** Application of the benchmark method to SNPs in replicated 3-SNP haplotypes identified with the proposed method

| Chr | 3-SNP haplotype tree                                   | OR <sup>a</sup> | P <sup>a</sup>        | Benchmark method (applied to logic tree SNPs only) <sup>b</sup> |                    |                       |
|-----|--------------------------------------------------------|-----------------|-----------------------|-----------------------------------------------------------------|--------------------|-----------------------|
|     |                                                        |                 |                       | Global score statistic                                          | Degrees of freedom | P                     |
| 6   | ((rs117106=C) and ((rs206018=G) or (rs9501179=A)))     | 0.196           | 3.0x10 <sup>-23</sup> | 127.389                                                         | 6                  | 4.6x10 <sup>-25</sup> |
| 6   | ((rs3129881=C) or ((rs375244=A) and (rs3132947=G)))    | 3.665           | 2.3x10 <sup>-24</sup> | 160.689                                                         | 6                  | 4.2x10 <sup>-32</sup> |
| 6   | ((rs35372932=T) and (rs9269190=C)) or (rs9270493=C)    | 0.365           | 9.6x10 <sup>-32</sup> | 158.755                                                         | 5                  | 1.8x10 <sup>-32</sup> |
| 6   | ((rs9268977=T) or ((rs3135395=T) or (rs550513=T)))     | 3.448           | 1.2x10 <sup>-29</sup> | 119.847                                                         | 7                  | 8.2x10 <sup>-23</sup> |
| 6   | ((rs9268634=G) or (rs35344500=C)) and (rs9275175=G)    | 0.448           | 1.3x10 <sup>-35</sup> | 163.123                                                         | 7                  | 7.1x10 <sup>-32</sup> |
| 6   | ((rs9268831=T) or (rs9269190=T)) or (rs9270652=C)      | 3.075           | 7.3x10 <sup>-29</sup> | 140.289                                                         | 6                  | 8.7x10 <sup>-28</sup> |
| 6   | ((rs3132947=G) or ((rs9501179=G) and (rs41546114=C)))  | 5.030           | 2.4x10 <sup>-22</sup> | 113.509                                                         | 6                  | 3.8x10 <sup>-22</sup> |
| 6   | ((rs9268831=T) or ((rs2395194=G) or (rs387608=A)))     | 3.601           | 2.2x10 <sup>-30</sup> | 124.925                                                         | 7                  | 7.2x10 <sup>-24</sup> |
| 6   | ((rs3132947=G) or ((rs9268014=C) and (rs41546114=C)))  | 5.012           | 1.0x10 <sup>-22</sup> | 113.035                                                         | 6                  | 4.7x10 <sup>-22</sup> |
| 6   | ((rs3132947=G) or ((rs9268055=T) and (rs41546114=C)))  | 5.012           | 1.0x10 <sup>-22</sup> | 112.163                                                         | 6                  | 7.2x10 <sup>-22</sup> |
| 6   | ((rs241437=G) or (rs3129299=C)) or (rs9276909=C)       | 4.716           | 1.8x10 <sup>-20</sup> | 127.570                                                         | 7                  | 2.0x10 <sup>-24</sup> |
| 6   | ((rs2395194=G) and (rs16870908=G)) or (rs9268831=T)    | 2.732           | 5.9x10 <sup>-33</sup> | 146.693                                                         | 6                  | 3.9x10 <sup>-29</sup> |
| 6   | ((rs9268213=A) and (rs41546114=C)) or (rs3132947=G)    | 5.012           | 1.0x10 <sup>-22</sup> | 111.456                                                         | 6                  | 1.0x10 <sup>-21</sup> |
| 6   | ((rs4538748=C) or (rs2064476=G)) and (rs35344500=A)    | 2.313           | 3.3x10 <sup>-35</sup> | 168.448                                                         | 6                  | 9.6x10 <sup>-34</sup> |
| 6   | ((rs2244027=A) or (rs2242665=C)) or (rs2071591=G)      | 2.873           | 8.7x10 <sup>-26</sup> | 76.256                                                          | 7                  | 8.0x10 <sup>-14</sup> |
| 6   | ((rs9296088=A) and (rs12207818=C)) and (rs181997=A)    | 0.204           | 6.6x10 <sup>-18</sup> | 97.965                                                          | 7                  | 2.8x10 <sup>-18</sup> |
| 6   | ((rs2071287=C) and (rs3094596=C)) or (rs185819=C)      | 3.370           | 1.5x10 <sup>-24</sup> | 119.583                                                         | 7                  | 9.4x10 <sup>-23</sup> |
| 6   | ((rs3132947=T) and ((rs404860=C) or (rs41546114=T)))   | 0.253           | 3.2x10 <sup>-21</sup> | 104.903                                                         | 6                  | 2.4x10 <sup>-20</sup> |
| 6   | ((rs11754586=T) or ((rs3131932=G) or (rs9262537=G)))   | 3.241           | 1.8x10 <sup>-19</sup> | 76.098                                                          | 6                  | 2.3x10 <sup>-14</sup> |
| 6   | ((rs10947251=A) or (rs41546114=T)) and (rs3132947=T)   | 0.203           | 2.8x10 <sup>-22</sup> | 112.040                                                         | 6                  | 7.6x10 <sup>-22</sup> |
| 6   | ((rs3132947=G) or (rs9266632=G)) or (rs185819=C)       | 4.321           | 2.0x10 <sup>-23</sup> | 100.854                                                         | 7                  | 7.2x10 <sup>-19</sup> |
| 6   | ((rs805273=A) and ((rs805267=G) or (rs9266774=T)))     | 0.264           | 3.1x10 <sup>-22</sup> | 101.022                                                         | 5                  | 3.2x10 <sup>-20</sup> |
| 6   | ((rs3828901=A) or ((rs707921=A) and (rs9266774=T)))    | 0.279           | 2.5x10 <sup>-21</sup> | 94.802                                                          | 5                  | 6.6x10 <sup>-19</sup> |
| 6   | ((rs3828901=G) and ((rs805268=A) or (rs9266774=C)))    | 3.586           | 4.4x10 <sup>-21</sup> | 92.605                                                          | 5                  | 1.9x10 <sup>-18</sup> |
| 6   | ((rs3828901=A) or ((rs3828919=A) and (rs2523497=T)))   | 0.313           | 9.0x10 <sup>-20</sup> | 92.502                                                          | 5                  | 2.0x10 <sup>-18</sup> |
| 6   | ((rs707922=G) or ((rs1046089=A) and (rs9266774=C)))    | 3.748           | 6.2x10 <sup>-22</sup> | 95.094                                                          | 7                  | 1.1x10 <sup>-17</sup> |
| 6   | ((rs3131932=G) or (rs28360042=C)) or (rs885950=C)      | 3.356           | 1.1x10 <sup>-20</sup> | 85.291                                                          | 7                  | 1.1x10 <sup>-15</sup> |
| 6   | ((rs9266774=T) and (rs2255741=A)) or (rs3828901=A)     | 0.279           | 2.6x10 <sup>-21</sup> | 93.411                                                          | 5                  | 1.3x10 <sup>-18</sup> |
| 6   | ((rs3749946=A) and ((rs2517506=T) and (rs7741091=A)))  | 0.287           | 1.9x10 <sup>-20</sup> | 76.474                                                          | 7                  | 7.2x10 <sup>-14</sup> |
| 6   | ((rs3828901=G) and ((rs12110785=T) or (rs2523644=T)))  | 3.544           | 6.3x10 <sup>-20</sup> | 97.538                                                          | 4                  | 3.3x10 <sup>-20</sup> |
| 6   | ((rs2239888=T) or (rs3134769=C)) and (rs3828901=G)     | 3.510           | 5.5x10 <sup>-21</sup> | 95.089                                                          | 5                  | 5.7x10 <sup>-19</sup> |
| 6   | ((rs2517681=T) or ((rs4148248=C) and (rs2735078=A)))   | 3.196           | 2.6x10 <sup>-18</sup> | 92.509                                                          | 4                  | 3.9x10 <sup>-19</sup> |
| 6   | ((rs17195733=G) or ((rs13201129=C) and (rs1737069=T))) | 0.360           | 1.8x10 <sup>-20</sup> | 92.753                                                          | 5                  | 1.8x10 <sup>-18</sup> |
| 6   | ((rs3130785=T) and ((rs9261301=G) or (rs1264570=C)))   | 0.340           | 2.7x10 <sup>-17</sup> | 92.694                                                          | 6                  | 8.3x10 <sup>-18</sup> |
| 6   | ((rs2517681=C) and ((rs3130785=T) or (rs2735078=G)))   | 0.317           | 1.2x10 <sup>-18</sup> | 98.277                                                          | 5                  | 1.2x10 <sup>-19</sup> |
| 6   | ((rs1345229=A) or (rs1233387=T)) or (rs1003581=G)      | 3.070           | 5.4x10 <sup>-18</sup> | 73.057                                                          | 7                  | 3.6x10 <sup>-13</sup> |
| 6   | ((rs4713429=G) or (rs12110785=T)) or (rs3131932=G)     | 3.093           | 1.0x10 <sup>-19</sup> | 75.618                                                          | 7                  | 1.1x10 <sup>-13</sup> |
| 6   | ((rs1003581=G) and (rs16894681=T)) or (rs1233387=T)    | 2.541           | 5.5x10 <sup>-17</sup> | 64.413                                                          | 6                  | 5.7x10 <sup>-12</sup> |
| 6   | ((rs2281043=T) or (rs7751451=G)) and (rs1635=A)        | 0.371           | 2.1x10 <sup>-16</sup> | 55.683                                                          | 7                  | 1.1x10 <sup>-9</sup>  |
| 6   | ((rs3117192=C) or (rs16894216=T)) and (rs7773193=T)    | 2.711           | 2.0x10 <sup>-16</sup> | 71.075                                                          | 5                  | 6.1x10 <sup>-14</sup> |
| 6   | ((rs9295704=C) and ((rs2451752=A) and (rs2575174=C)))  | 0.365           | 8.9x10 <sup>-15</sup> | 53.502                                                          | 7                  | 3.0x10 <sup>-9</sup>  |
| 6   | ((rs6939576=G) or ((rs2859365=G) or (rs6930033=A)))    | 2.820           | 1.7x10 <sup>-16</sup> | 78.111                                                          | 7                  | 3.3x10 <sup>-14</sup> |
| 6   | ((rs7773193=C) or ((rs17280818=T) and (rs2394100=T)))  | 0.382           | 6.3x10 <sup>-16</sup> | 67.438                                                          | 5                  | 3.5x10 <sup>-13</sup> |

| Chr | 3-SNP haplotype tree                                   | OR <sup>a</sup> | P <sup>a</sup>        | Benchmark method (applied to logic tree SNPs only) <sup>b</sup> |                    |                       |
|-----|--------------------------------------------------------|-----------------|-----------------------|-----------------------------------------------------------------|--------------------|-----------------------|
|     |                                                        |                 |                       | Global score statistic                                          | Degrees of freedom | P                     |
| 7   | ((rs12671658=T) or (rs12702656=A)) and (rs11768586=G)  | 0.066           | 3.9x10 <sup>-9</sup>  | 31.899                                                          | 6                  | 1.7x10 <sup>-5</sup>  |
| 9   | ((rs4979484=C) or ((rs13300483=T) and (rs7028891=G)))  | 1.672           | 3.0x10 <sup>-21</sup> | 90.263                                                          | 6                  | 2.7x10 <sup>-17</sup> |
| 9   | ((rs7028891=G) and ((rs4979462=T) or (rs10739402=T)))  | 1.696           | 2.7x10 <sup>-22</sup> | 100.579                                                         | 7                  | 8.2x10 <sup>-19</sup> |
| 9   | ((rs7028891=A) and ((rs2418376=A) or (rs10759773=G)))  | 0.604           | 9.3x10 <sup>-21</sup> | 85.233                                                          | 7                  | 1.2x10 <sup>-15</sup> |
| 9   | ((rs10817678=G) or ((rs1407306=T) and (rs7048742=A)))  | 0.613           | 2.1x10 <sup>-19</sup> | 91.584                                                          | 6                  | 1.4x10 <sup>-17</sup> |
| 9   | ((rs4979462=T) or ((rs10739402=T) and (rs10817564=C))) | 1.687           | 1.5x10 <sup>-21</sup> | 91.479                                                          | 7                  | 6.1x10 <sup>-17</sup> |

<sup>a</sup> 3-SNP haplotype OR and p-value in the combined sample (N=2,886), under the proposed logic regression method.

<sup>b</sup> Benchmark haplotype association testing method implemented in R 'haplo.stats', with 3 SNPs specified in the haplotype tree (minimum haplotype frequency=20).



**Supplementary Table S6:** GTEx Analysis v7 eQTL enrichment analysis results for blood- and liver-related cell/tissue types

| Cell/Tissue Type            | Significant eQTLs, PBC SNPs (N=5,207) | Significant eQTLs, Comparison (N=76,136) | OR    | Fisher P             |
|-----------------------------|---------------------------------------|------------------------------------------|-------|----------------------|
| EBV-transformed lymphocytes | 64                                    | 618                                      | 1.521 | 2.7x10 <sup>-3</sup> |
| Whole blood                 | 179                                   | 2,415                                    | 1.087 | 0.289                |
| Liver                       | 51                                    | 672                                      | 1.111 | 0.446                |

Abbreviations: EBV, Epstein-Barr virus; sig, significant; eQTL, expression quantitative trait loci.  
Enrichment defined as any result meeting the Bonferroni-corrected p-value threshold (.05/3=0.017)

**Supplementary Table S7: H3K4me1 histone mark enrichment analysis results for all 29 blood- and liver-related epigenomes**

| EID  | EID Grouping   | Epigenome Name                                | H3K4me1 Peak Overlap, PBC SNPs (N=106) | H3K4me1 Peak Overlap, Comparison (N=16,036) | OR    | Fisher P              |
|------|----------------|-----------------------------------------------|----------------------------------------|---------------------------------------------|-------|-----------------------|
| E032 | HSC & B-cell   | Primary B cells (from PB)                     | 35                                     | 1,680                                       | 4.212 | 4.1x10 <sup>-10</sup> |
| E034 | Blood & T-cell | Primary T cells from primary blood (from PB)  | 34                                     | 1,665                                       | 4.076 | 1.3x10 <sup>-9</sup>  |
| E124 | ENCODE2012     | Monocytes-CD14+ RO01746                       | 34                                     | 1,732                                       | 3.899 | 3.7x10 <sup>-9</sup>  |
| E118 | ENCODE2012     | HepG2 hepatocellular carcinoma                | 31                                     | 1,538                                       | 3.895 | 1.2x10 <sup>-8</sup>  |
| E029 | HSC & B-cell   | Primary monocytes (from PB)                   | 24                                     | 1,412                                       | 3.031 | 1.5x10 <sup>-5</sup>  |
| E044 | Blood & T-cell | Primary T regulatory cells (from PB)          | 25                                     | 1,546                                       | 2.892 | 2.2x10 <sup>-5</sup>  |
| E043 | Blood & T-cell | Primary T helper cells (from PB)              | 28                                     | 1,863                                       | 2.731 | 2.6x10 <sup>-5</sup>  |
| E038 | Blood & T-cell | Primary T helper naive cells (from PB)        | 26                                     | 1,694                                       | 2.751 | 4.2x10 <sup>-5</sup>  |
| E123 | ENCODE2012     | K562 leukemia                                 | 22                                     | 1,320                                       | 2.919 | 5.0x10 <sup>-5</sup>  |
| E031 | HSC & B-cell   | Primary B cells from cord blood               | 20                                     | 1,163                                       | 2.974 | 7.6x10 <sup>-5</sup>  |
| E041 | Blood & T-cell | Primary T helper cells PMA-I stimulated       | 28                                     | 2,016                                       | 2.496 | 1.1x10 <sup>-4</sup>  |
| E048 | Blood & T-cell | Primary T CD8+ memory cells (from PB)         | 25                                     | 1,704                                       | 2.596 | 1.1x10 <sup>-4</sup>  |
| E039 | Blood & T-cell | Primary T helper naive cells (from PB)        | 25                                     | 1,751                                       | 2.518 | 2.3x10 <sup>-4</sup>  |
| E037 | Blood & T-cell | Primary T helper memory cells (from PB)       | 25                                     | 1,783                                       | 2.467 | 2.7x10 <sup>-4</sup>  |
| E115 | ENCODE2012     | Dnd41 T cell leukemia                         | 19                                     | 1,198                                       | 2.705 | 3.3x10 <sup>-4</sup>  |
| E047 | Blood & T-cell | Primary T CD8+ naive cells (from PB)          | 24                                     | 1,707                                       | 2.456 | 3.7x10 <sup>-4</sup>  |
| E116 | ENCODE2012     | GM12878 lymphoblastoid                        | 21                                     | 1,441                                       | 2.502 | 5.1x10 <sup>-4</sup>  |
| E042 | Blood & T-cell | Primary T helper 17 cells PMA-I stimulated    | 23                                     | 1,654                                       | 2.409 | 5.8x10 <sup>-4</sup>  |
| E046 | HSC & B-cell   | Primary natural killer cells (from PB)        | 21                                     | 1,466                                       | 2.455 | 6.3x10 <sup>-4</sup>  |
| E040 | Blood & T-cell | Primary T helper memory cells (from PB)       | 23                                     | 1,672                                       | 2.380 | 6.5x10 <sup>-4</sup>  |
| E030 | HSC & B-cell   | Primary neutrophils (from PB)                 | 18                                     | 1,233                                       | 2.456 | 1.4x10 <sup>-3</sup>  |
| E062 | Blood & T-cell | Primary mononuclear cells (from PB)           | 14                                     | 913                                         | 2.520 | 0.005                 |
| E050 | HSC & B-cell   | Primary HSCs G-CSF-mobilized female           | 24                                     | 2,077                                       | 1.967 | 0.006                 |
| E051 | HSC & B-cell   | Primary HSCs G-CSF-mobilized male             | 21                                     | 1,766                                       | 1.996 | 0.008                 |
| E045 | Blood & T-cell | Primary T cells effector/memory enriched (PB) | 17                                     | 1,399                                       | 1.998 | 0.014                 |
| E066 | Other          | Liver                                         | 21                                     | 1,895                                       | 1.844 | 0.016                 |
| E036 | HSC & B-cell   | Primary HSCs short term culture               | 20                                     | 1,751                                       | 1.897 | 0.018                 |
| E035 | HSC & B-cell   | Primary HSCs                                  | 13                                     | 1,056                                       | 1.983 | 0.029                 |
| E033 | Blood & T-cell | Primary T cells from cord blood               | 9                                      | 971                                         | 1.439 | 0.302                 |

Abbreviations: H3K4me1, histone H3 lysine 4 monomethylation; EID, epigenome identifier; PB, peripheral blood; HSC, hematopoietic stem cell. Enrichment defined as any result meeting the Bonferroni-corrected p-value threshold (.05/29=1.7x10<sup>-3</sup> for histone modification marks).

**Supplementary Table S8: H3K4me3 histone mark enrichment analysis results for all 29 blood- and liver-related epigenomes**

| EID  | EID Grouping   | Epigenome Name                                | H3K4me3 Peak Overlap, PBC SNPs (N=106) | H3K4me3 Peak Overlap, Comparison (N=16,036) | OR    | Fisher P             |
|------|----------------|-----------------------------------------------|----------------------------------------|---------------------------------------------|-------|----------------------|
| E032 | HSC & B-cell   | Primary B cells (from PB)                     | 13                                     | 306                                         | 7.182 | 1.7x10 <sup>-7</sup> |
| E031 | HSC & B-cell   | Primary B cells from cord blood               | 13                                     | 335                                         | 6.550 | 4.5x10 <sup>-7</sup> |
| E116 | ENCODE2012     | GM12878 lymphoblastoid                        | 18                                     | 699                                         | 4.487 | 9.0x10 <sup>-7</sup> |
| E062 | Blood & T-cell | Primary mononuclear cells (from PB)           | 12                                     | 335                                         | 5.982 | 2.9x10 <sup>-6</sup> |
| E044 | Blood & T-cell | Primary T regulatory cells (from PB)          | 15                                     | 575                                         | 4.431 | 7.0x10 <sup>-6</sup> |
| E124 | ENCODE2012     | Monocytes-CD14+ RO01746                       | 19                                     | 896                                         | 3.690 | 7.1x10 <sup>-6</sup> |
| E115 | ENCODE2012     | Dnd41 T cell leukemia                         | 12                                     | 389                                         | 5.134 | 1.3x10 <sup>-5</sup> |
| E034 | Blood & T-cell | Primary T cells from primary blood (from PB)  | 11                                     | 357                                         | 5.084 | 3.0x10 <sup>-5</sup> |
| E118 | ENCODE2012     | HepG2 hepatocellular carcinoma                | 12                                     | 440                                         | 4.524 | 4.1x10 <sup>-5</sup> |
| E042 | Blood & T-cell | Primary T helper 17 cells PMA-I stimulated    | 14                                     | 669                                         | 3.495 | 1.5x10 <sup>-4</sup> |
| E050 | HSC & B-cell   | Primary HSCs G-CSF-mobilized female           | 13                                     | 610                                         | 3.534 | 2.2x10 <sup>-4</sup> |
| E029 | HSC & B-cell   | Primary monocytes (from PB)                   | 7                                      | 194                                         | 5.772 | 3.6x10 <sup>-4</sup> |
| E123 | ENCODE2012     | K562 leukemia                                 | 11                                     | 486                                         | 3.704 | 4.2x10 <sup>-4</sup> |
| E051 | HSC & B-cell   | Primary HSCs G-CSF-mobilized male             | 14                                     | 769                                         | 3.021 | 5.9x10 <sup>-4</sup> |
| E041 | Blood & T-cell | Primary T helper cells PMA-I stimulated       | 14                                     | 772                                         | 3.008 | 6.2x10 <sup>-4</sup> |
| E046 | HSC & B-cell   | Primary natural killer cells (from PB)        | 8                                      | 283                                         | 4.543 | 6.6x10 <sup>-4</sup> |
| E035 | HSC & B-cell   | Primary HSCs                                  | 9                                      | 358                                         | 4.063 | 7.0x10 <sup>-4</sup> |
| E047 | Blood & T-cell | Primary T CD8+ naive cells (from PB)          | 10                                     | 437                                         | 3.718 | 7.1x10 <sup>-4</sup> |
| E066 | Other          | Liver                                         | 14                                     | 786                                         | 2.952 | 7.3x10 <sup>-4</sup> |
| E030 | HSC & B-cell   | Primary neutrophils (from PB)                 | 10                                     | 469                                         | 3.457 | 0.001                |
| E037 | Blood & T-cell | Primary T helper memory cells (from PB)       | 11                                     | 589                                         | 3.036 | 0.002                |
| E038 | Blood & T-cell | Primary T helper naive cells (from PB)        | 11                                     | 618                                         | 2.888 | 0.003                |
| E033 | Blood & T-cell | Primary T cells from cord blood               | 8                                      | 368                                         | 3.475 | 0.003                |
| E043 | Blood & T-cell | Primary T helper cells (from PB)              | 10                                     | 554                                         | 2.911 | 0.004                |
| E048 | Blood & T-cell | Primary T CD8+ memory cells (from PB)         | 11                                     | 656                                         | 2.714 | 0.004                |
| E036 | HSC & B-cell   | Primary HSCs short term culture               | 9                                      | 517                                         | 2.785 | 0.008                |
| E045 | Blood & T-cell | Primary T cells effector/memory enriched (PB) | 10                                     | 634                                         | 2.530 | 0.010                |
| E039 | Blood & T-cell | Primary T helper naive cells (from PB)        | 9                                      | 615                                         | 2.326 | 0.022                |
| E040 | Blood & T-cell | Primary T helper memory cells (from PB)       | 10                                     | 770                                         | 2.065 | 0.037                |

Abbreviations: H3K4me3, histone H3 lysine 4 trimethylation; EID, epigenome identifier; PB, peripheral blood; HSC, hematopoietic stem cell.

Enrichment defined as any result meeting the Bonferroni-corrected p-value threshold (.05/29=1.7x10<sup>-3</sup> for histone modification marks).

**Supplementary Table S9: DNase enrichment analysis results for all 11 blood- and liver-related epigenomes**

| EID  | EID Grouping   | Epigenome Name                               | DNase Peak Overlap, PBC SNPs (N=106) | DNase Peak Overlap, Comparison (N=16,036) | OR    | Fisher P |
|------|----------------|----------------------------------------------|--------------------------------------|-------------------------------------------|-------|----------|
| E033 | Blood & T-cell | Primary T cells from cord blood              | 8                                    | 337                                       | 3.802 | 0.002    |
| E034 | Blood & T-cell | Primary T cells from primary blood (from PB) | 9                                    | 437                                       | 3.311 | 0.003    |
| E124 | ENCODE2012     | Monocytes-CD14+ RO01746                      | 9                                    | 439                                       | 3.296 | 0.003    |
| E032 | HSC & B-cell   | Primary B cells (from PB)                    | 9                                    | 463                                       | 3.120 | 0.004    |
| E118 | ENCODE2012     | HepG2 hepatocellular carcinoma               | 6                                    | 319                                       | 2.956 | 0.020    |
| E050 | HSC & B-cell   | Primary HSCs G-CSF-mobilized female          | 7                                    | 428                                       | 2.578 | 0.025    |
| E116 | ENCODE2012     | GM12878 lymphoblastoid                       | 8                                    | 581                                       | 2.171 | 0.059    |
| E123 | ENCODE2012     | K562 leukemia                                | 7                                    | 572                                       | 1.911 | 0.107    |
| E046 | HSC & B-cell   | Primary natural killer cells (from PB)       | 5                                    | 397                                       | 1.950 | 0.194    |
| E029 | HSC & B-cell   | Primary monocytes (from PB)                  | 4                                    | 331                                       | 1.861 | 0.286    |
| E051 | HSC & B-cell   | Primary HSCs G-CSF-mobilized male            | 4                                    | 352                                       | 1.747 | 0.300    |

Abbreviations: EID, epigenome identifier; PB, peripheral blood; HSC, hematopoietic stem cell.

Enrichment defined as any result meeting the Bonferroni-corrected p-value threshold ( $.05/11=4.5 \times 10^{-3}$  for DNase).

**Supplementary Table S10: Functional annotations of SNPs in all replicated 3-SNP haplotypes**

| Chr | 3-SNP Haplotype                                     | SNP        | Chr position (hg19) | Ontology                | Mapped Gene                                                  | DHS overlap <sup>a</sup> , # EIDs (PBC EIDs) | H3K4me1 overlap <sup>a</sup> , # EIDs (PBC EIDs) | H3K4me3 overlap <sup>a</sup> , # EIDs (PBC EIDs) | Bound protein <sup>b</sup> : Cell line (protein)                                                                                                              | # Altered motifs <sup>c</sup> | Significant eQTLs <sup>d</sup> : Tissue (gene)                                                                                                                                                                                   |
|-----|-----------------------------------------------------|------------|---------------------|-------------------------|--------------------------------------------------------------|----------------------------------------------|--------------------------------------------------|--------------------------------------------------|---------------------------------------------------------------------------------------------------------------------------------------------------------------|-------------------------------|----------------------------------------------------------------------------------------------------------------------------------------------------------------------------------------------------------------------------------|
| 6   | ((rs3117106=C) and ((rs206018=G) or (rs9501179=A))) | rs3117106  | 32343369            | intergenic              | <i>C6orf10</i> (dist=3680),<br><i>HCG23</i> (dist=14918)     | 0 (0)                                        | 11 (0)                                           | 3 (0)                                            | NA                                                                                                                                                            | 1                             | Whole Blood ( <i>C4A</i> , <i>C4B</i> , <i>CYP21A1P</i> , <i>CYP21A2</i> , <i>HLA-DRB5</i> , <i>PBX2</i> ); Lymphoblastoid ( <i>C4A</i> ); Liver ( <i>C4A</i> , <i>CYP21A1P</i> , <i>HLA-DMA</i> , <i>STK19P</i> , <i>TNXA</i> ) |
| 6   | ((rs3117106=C) and ((rs206018=G) or (rs9501179=A))) | rs206018   | 32177880            | intronic                | <i>NOTCH4</i>                                                | 0 (0)                                        | 8 (2)                                            | 2 (0)                                            | NA                                                                                                                                                            | 2                             | Whole Blood ( <i>GP3M3</i> ); Lymphoblastoid ( <i>NOTCH4</i> , <i>HLA-DRA</i> , <i>LY6G5C</i> , <i>SKIV2L</i> )                                                                                                                  |
| 6   | ((rs3117106=C) and ((rs206018=G) or (rs9501179=A))) | rs9501179  | 32292993            | intronic                | <i>C6orf10</i>                                               | 0 (0)                                        | 2 (1)                                            | 2 (0)                                            | NA                                                                                                                                                            | 4                             | Whole Blood ( <i>HLA-DRA</i> ); Lymphoblastoid ( <i>C2</i> )                                                                                                                                                                     |
| 6   | ((rs3129881=C) or ((rs375244=A) and (rs3132947=G))) | rs3129881  | 32409484            | intronic                | <i>HLA-DRA</i>                                               | 0 (0)                                        | 42 (20)                                          | 50 (17)                                          | GM12878 (OCT2, POL2, POL24H8, POU2F2); GM12891 (OCT2, POL2, POL24H8, POU2F2); GM12892 (POL2, POL24H8)                                                         | 3                             | Whole Blood ( <i>C4A</i> , <i>C4B</i> , <i>HLA-DQA1</i> , <i>HLA-DQA2</i> , <i>HLA-DQB2</i> , <i>HLA-DRB5</i> ); Lymphoblastoid ( <i>HLA-DQA2</i> , <i>HLA-DRB5</i> ); Liver ( <i>HLA-DRB5</i> )                                 |
| 6   | ((rs3129881=C) or ((rs375244=A) and (rs3132947=G))) | rs375244   | 32191457            | intronic                | <i>NOTCH4</i>                                                | 0 (0)                                        | 69 (15)                                          | 38 (3)                                           | NA                                                                                                                                                            | 3                             | Whole Blood ( <i>GP3M3</i> ); Lymphoblastoid ( <i>NOTCH4</i> )                                                                                                                                                                   |
| 6   | ((rs3129881=C) or ((rs375244=A) and (rs3132947=G))) | rs3132947  | 32176782            | intronic                | <i>NOTCH4</i>                                                | 0 (0)                                        | 2 (1)                                            | 4 (0)                                            | NA                                                                                                                                                            | 3                             | Whole Blood ( <i>AGPAT1</i> , <i>C4A</i> , <i>C4B</i> , <i>CYP21A1P</i> , <i>HLA-DRA</i> , <i>PBX2</i> , <i>SKIV2L</i> ); Lymphoblastoid ( <i>C4A</i> , <i>HLA-DQA1</i> , <i>RNF5</i> ); Liver ( <i>AGPAT1</i> , <i>RNF5</i> )   |
| 6   | ((rs35372932=T) and (rs9269190=C)) or (rs9270493=C) | rs35372932 | 32564985            | intergenic              | <i>HLA-DRB1</i> (dist=7372),<br><i>HLA-DQA1</i> (dist=40198) | 0 (0)                                        | 1 (1)                                            | 0 (0)                                            | NA                                                                                                                                                            | 1                             | NA                                                                                                                                                                                                                               |
| 6   | ((rs35372932=T) and (rs9269190=C)) or (rs9270493=C) | rs9269190  | 32448500            | intergenic              | <i>HLA-DRA</i> (dist=35674),<br><i>HLA-DRB5</i> (dist=36654) | 2 (2)                                        | 4 (4)                                            | 2 (2)                                            | NA                                                                                                                                                            | 2                             | Whole Blood ( <i>HLA-DRA</i> )                                                                                                                                                                                                   |
| 6   | ((rs35372932=T) and (rs9269190=C)) or (rs9270493=C) | rs9270493  | 32559110            | intergenic              | <i>HLA-DRB1</i> (dist=1497),<br><i>HLA-DQA1</i> (dist=46073) | 0 (0)                                        | 12 (9)                                           | 2 (1)                                            | NA                                                                                                                                                            | 1                             | NA                                                                                                                                                                                                                               |
| 6   | (rs9268977=T) or ((rs3135395=T) or (rs550513=T))    | rs9268977  | 32434939            | intergenic              | <i>HLA-DRA</i> (dist=22113),<br><i>HLA-DRB5</i> (dist=50215) | 0 (0)                                        | 0 (0)                                            | 0 (0)                                            | NA                                                                                                                                                            | 0                             | Whole Blood ( <i>C2</i> , <i>C4B</i> , <i>HLA-DRB5</i> ); Liver ( <i>C4A</i> , <i>HLA-DMA</i> , <i>HLA-DRB5</i> )                                                                                                                |
| 6   | (rs9268977=T) or ((rs3135395=T) or (rs550513=T))    | rs3135395  | 32405192            | intergenic              | <i>BTNL2</i> (dist=30285),<br><i>HLA-DRA</i> (dist=2427)     | 8 (8)                                        | 45 (19)                                          | 16 (8)                                           | GM10847 (NFKB); GM12878 (NFKB); GM12891 (NFKB, POL2); GM12892 (NFKB, POL24H8); GM15510 (NFKB); GM18505 (NFKB); GM18951 (NFKB); GM19099 (NFKB); GM19193 (NFKB) | 1                             | Whole Blood ( <i>HLA-DQB1-AS1</i> , <i>HLA-DRB5</i> , <i>HLA-DRB6</i> , <i>HLA-DRB9</i> ); Lymphoblastoid ( <i>HLA-DRB5</i> , <i>HLA-DRB6</i> , <i>HLA-DRB9</i> ); Liver ( <i>HLA-DRB5</i> )                                     |
| 6   | (rs9268977=T) or ((rs3135395=T) or (rs550513=T))    | rs550513   | 31920687            | intronic;<br>downstream | <i>NELFE</i> ; <i>CFB</i>                                    | 0 (0)                                        | 42 (7)                                           | 24 (2)                                           | HepG2 (POL2)                                                                                                                                                  | 0                             | Whole Blood ( <i>HSPA1B</i> , <i>LY6G6F</i> , <i>RDBP</i> , <i>SKIV2L</i> ); Lymphoblastoid ( <i>SKIV2L</i> )                                                                                                                    |

| Chr | 3-SNP Haplotype                                     | SNP        | Chr position (hg19) | Ontology     | Mapped Gene                                                                                                               | DHS overlap <sup>a</sup> , # EIDs (PBC EIDs) | H3K4me1 overlap <sup>a</sup> , # EIDs (PBC EIDs) | H3K4me3 overlap <sup>a</sup> , # EIDs (PBC EIDs) | Bound protein <sup>b</sup> : Cell line (protein) | # Altered motifs <sup>c</sup> | Significant eQTLs <sup>d</sup> : Tissue (gene)                                                                                                                                                                                                                                                                           |
|-----|-----------------------------------------------------|------------|---------------------|--------------|---------------------------------------------------------------------------------------------------------------------------|----------------------------------------------|--------------------------------------------------|--------------------------------------------------|--------------------------------------------------|-------------------------------|--------------------------------------------------------------------------------------------------------------------------------------------------------------------------------------------------------------------------------------------------------------------------------------------------------------------------|
| 6   | ((rs9268634=G) or (rs35344500=C)) and (rs9275175=G) | rs9268634  | 32406530            | intergenic   | <i>BTNL2</i> (dist=31623),<br><i>HLA-DRA</i> (dist=1089)                                                                  | 1 (1)                                        | 30 (13)                                          | 14 (5)                                           | NA                                               | 5                             | Whole Blood ( <i>HLA-DQA1</i> , <i>HLA-DQA2</i> , <i>HLA-DQB1</i> , <i>HLA-DQB2</i> , <i>HLA-DRA</i> , <i>HLA-DRB1</i> , <i>HLA-DRB6</i> ); Lymphoblastoid ( <i>HLA-DQA2</i> , <i>HLA-DQB2</i> , <i>HLA-DRB6</i> , <i>HLA-DRB9</i> , <i>NOTCH4</i> ); Liver ( <i>HLA-DQA2</i> )                                          |
| 6   | ((rs9268634=G) or (rs35344500=C)) and (rs9275175=G) | rs35344500 | 32609525            | intronic     | <i>HLA-DQA1</i>                                                                                                           | 1 (1)                                        | 20 (15)                                          | 8 (6)                                            | NA                                               | 0                             | Whole Blood ( <i>HLA-DQA1</i> , <i>HLA-DQB1</i> , <i>HLA-DQB2</i> , <i>HLA-DRB1</i> , <i>HLA-DRB5</i> , <i>PSMB9</i> ); Lymphoblastoid ( <i>C4A</i> , <i>HLA-DQB2</i> , <i>HLA-DRB1</i> , <i>HLA-DRB9</i> ); Liver ( <i>C4A</i> , <i>HLA-DMA</i> , <i>HLA-DQB1</i> , <i>STK19P</i> , <i>TNXA</i> )                       |
| 6   | ((rs9268634=G) or (rs35344500=C)) and (rs9275175=G) | rs9275175  | 32654147            | intergenic   | <i>HLA-DQB1</i> (dist=19681),<br><i>HLA-DQA2</i> (dist=55016)                                                             | 0 (0)                                        | 26 (24)                                          | 7 (6)                                            | NA                                               | 2                             | NA                                                                                                                                                                                                                                                                                                                       |
| 6   | ((rs9268831=T) or (rs9269190=T)) or (rs9270652=C)   | rs9268831  | 32427748            | intergenic   | <i>HLA-DRA</i> (dist=14922),<br><i>HLA-DRB5</i> (dist=57406)                                                              | 5 (1)                                        | 31 (19)                                          | 71 (16)                                          | GM18951 (POL2); MCF-7 (CMYC, HAE2F1, POL2)       | 1                             | Whole Blood ( <i>HLA-DQA1</i> , <i>HLA-DQA2</i> , <i>HLA-DQB1</i> , <i>HLA-DQB1-AS1</i> , <i>HLA-DQB2</i> , <i>HLA-DRB1</i> , <i>HLA-DRB6</i> , <i>HLA-DRB9</i> ); Lymphoblastoid ( <i>HLA-DQA2</i> , <i>HLA-DQB2</i> , <i>HLA-DRB6</i> , <i>HLA-DRB9</i> , <i>NOTCH4</i> ); Liver ( <i>HLA-DQA2</i> , <i>HLA-DQB2</i> ) |
| 6   | ((rs9268831=T) or (rs9269190=T)) or (rs9270652=C)   | rs9269190  | 32448500            | intergenic   | <i>HLA-DRA</i> (dist=35674),<br><i>HLA-DRB5</i> (dist=36654)                                                              | 2 (2)                                        | 4 (4)                                            | 2 (2)                                            | NA                                               | 2                             | Whole Blood ( <i>HLA-DRA</i> )                                                                                                                                                                                                                                                                                           |
| 6   | ((rs9268831=T) or (rs9269190=T)) or (rs9270652=C)   | rs9270652  | 32565905            | intergenic   | <i>HLA-DRB1</i> (dist=8292),<br><i>HLA-DQA1</i> (dist=39278)                                                              | 1 (1)                                        | 1 (1)                                            | 2 (0)                                            | NA                                               | 0                             | NA                                                                                                                                                                                                                                                                                                                       |
| 6   | (rs3132947=G) or ((rs9501179=G) and (rs41546114=C)) | rs3132947  | 32176782            | intronic     | <i>NOTCH4</i>                                                                                                             | 0 (0)                                        | 2 (1)                                            | 4 (0)                                            | NA                                               | 3                             | Whole Blood ( <i>AGPAT1</i> , <i>C4A</i> , <i>C4B</i> , <i>CYP21A1P</i> , <i>HLA-DRA</i> , <i>PBX2</i> , <i>SKIV2L</i> ); Lymphoblastoid ( <i>C4A</i> , <i>HLA-DQA1</i> , <i>RNF5</i> ); Liver ( <i>AGPAT1</i> , <i>RNF5</i> )                                                                                           |
| 6   | (rs3132947=G) or ((rs9501179=G) and (rs41546114=C)) | rs9501179  | 32292993            | intronic     | <i>C6orf10</i>                                                                                                            | 0 (0)                                        | 2 (1)                                            | 2 (0)                                            | NA                                               | 4                             | Whole Blood ( <i>HLA-DRA</i> ); Lymphoblastoid ( <i>C2</i> )                                                                                                                                                                                                                                                             |
| 6   | (rs3132947=G) or ((rs9501179=G) and (rs41546114=C)) | rs41546114 | 31382831            | exonic; UTR3 | <i>MICA</i> ;<br><i>MICA</i> (NM_001289152:c.*72T>C, NM_001289153:c.*72T>C, NM_001289154:c.*72T>C, NM_001177519:c.*72T>C) | 3 (1)                                        | 15 (8)                                           | 9 (3)                                            | NA                                               | 0                             | NA                                                                                                                                                                                                                                                                                                                       |
| 6   | (rs9268831=T) or ((rs2395194=G) or (rs387608=A))    | rs9268831  | 32427748            | intergenic   | <i>HLA-DRA</i> (dist=14922),<br><i>HLA-DRB5</i> (dist=57406)                                                              | 5 (1)                                        | 31 (19)                                          | 71 (16)                                          | GM18951 (POL2); MCF-7 (CMYC, HAE2F1, POL2)       | 1                             | Whole Blood ( <i>HLA-DQA1</i> , <i>HLA-DQA2</i> , <i>HLA-DQB1</i> , <i>HLA-DQB1-AS1</i> , <i>HLA-DQB2</i> , <i>HLA-DRB1</i> , <i>HLA-DRB6</i> , <i>HLA-DRB9</i> ); Lymphoblastoid ( <i>HLA-DQA2</i> , <i>HLA-DQB2</i> , <i>HLA-DRB6</i> , <i>HLA-DRB9</i> , <i>NOTCH4</i> ); Liver ( <i>HLA-DQA2</i> , <i>HLA-DQB2</i> ) |
| 6   | (rs9268831=T) or ((rs2395194=G) or (rs387608=A))    | rs2395194  | 32447953            | intergenic   | <i>HLA-DRA</i> (dist=35127),<br><i>HLA-DRB5</i> (dist=37201)                                                              | 0 (0)                                        | 0 (0)                                            | 0 (0)                                            | NA                                               | 0                             | NA                                                                                                                                                                                                                                                                                                                       |
| 6   | (rs9268831=T) or ((rs2395194=G) or (rs387608=A))    | rs387608   | 31941557            | intronic     | <i>STK19</i>                                                                                                              | 0 (0)                                        | 102 (23)                                         | 82 (14)                                          | NA                                               | 4                             | Whole Blood ( <i>HSPA1B</i> , <i>LSM2</i> , <i>RDBP</i> , <i>SKIV2L</i> ); Lymphoblastoid ( <i>SKIV2L</i> )                                                                                                                                                                                                              |
| 6   | (rs3132947=G) or ((rs9268014=C) and (rs41546114=C)) | rs3132947  | 32176782            | intronic     | <i>NOTCH4</i>                                                                                                             | 0 (0)                                        | 2 (1)                                            | 4 (0)                                            | NA                                               | 3                             | Whole Blood ( <i>AGPAT1</i> , <i>C4A</i> , <i>C4B</i> , <i>CYP21A1P</i> , <i>HLA-DRA</i> , <i>PBX2</i> , <i>SKIV2L</i> ); Lymphoblastoid ( <i>C4A</i> , <i>HLA-DQA1</i> , <i>RNF5</i> ); Liver ( <i>AGPAT1</i> , <i>RNF5</i> )                                                                                           |

| Chr | 3-SNP Haplotype                                       | SNP        | Chr position (hg19) | Ontology     | Mapped Gene                                                                                                            | DHS overlap <sup>a</sup> , # EIDs (PBC EIDs) | H3K4me1 overlap <sup>a</sup> , # EIDs (PBC EIDs) | H3K4me3 overlap <sup>a</sup> , # EIDs (PBC EIDs) | Bound protein <sup>b</sup> : Cell line (protein) | # Altered motifs <sup>c</sup> | Significant eQTLs <sup>d</sup> : Tissue (gene)                                                                                                                                                                                                                                                                           |
|-----|-------------------------------------------------------|------------|---------------------|--------------|------------------------------------------------------------------------------------------------------------------------|----------------------------------------------|--------------------------------------------------|--------------------------------------------------|--------------------------------------------------|-------------------------------|--------------------------------------------------------------------------------------------------------------------------------------------------------------------------------------------------------------------------------------------------------------------------------------------------------------------------|
| 6   | ((rs3132947=G) or ((rs9268014=C) and (rs41546114=C))) | rs9268014  | 32224852            | intergenic   | <i>NOTCH4</i> (dist=33008), <i>C6orf10</i> (dist=35623)                                                                | 0 (0)                                        | 8 (2)                                            | 12 (0)                                           | NA                                               | 0                             | Whole Blood ( <i>C4B</i> , <i>HLA-DRB5</i> )                                                                                                                                                                                                                                                                             |
| 6   | ((rs3132947=G) or ((rs9268014=C) and (rs41546114=C))) | rs41546114 | 31382831            | exonic; UTR3 | <i>MICA</i> ; <i>MICA</i> (NM_001289152:c.*72T>C, NM_001289153:c.*72T>C, NM_001289154:c.*72T>C, NM_001177519:c.*72T>C) | 3 (1)                                        | 15 (8)                                           | 9 (3)                                            | NA                                               | 0                             | NA                                                                                                                                                                                                                                                                                                                       |
| 6   | ((rs3132947=G) or ((rs9268055=T) and (rs41546114=C))) | rs3132947  | 32176782            | intronic     | <i>NOTCH4</i>                                                                                                          | 0 (0)                                        | 2 (1)                                            | 4 (0)                                            | NA                                               | 3                             | Whole Blood ( <i>AGPAT1</i> , <i>C4A</i> , <i>C4B</i> , <i>CYP21A1P</i> , <i>HLA-DRA</i> , <i>PBX2</i> , <i>SKIV2L</i> ); Lymphoblastoid ( <i>C4A</i> , <i>HLA-DQA1</i> , <i>RNF5</i> ); Liver ( <i>AGPAT1</i> , <i>RNF5</i> )                                                                                           |
| 6   | ((rs3132947=G) or ((rs9268055=T) and (rs41546114=C))) | rs9268055  | 32230608            | intergenic   | <i>NOTCH4</i> (dist=38764), <i>C6orf10</i> (dist=29867)                                                                | 0 (0)                                        | 0 (0)                                            | 0 (0)                                            | NA                                               | 1                             | Whole Blood ( <i>C4B</i> , <i>HLA-DRB5</i> ); Liver ( <i>C4A</i> , <i>CYP21A1P</i> )                                                                                                                                                                                                                                     |
| 6   | ((rs3132947=G) or ((rs9268055=T) and (rs41546114=C))) | rs41546114 | 31382831            | exonic; UTR3 | <i>MICA</i> ; <i>MICA</i> (NM_001289152:c.*72T>C, NM_001289153:c.*72T>C, NM_001289154:c.*72T>C, NM_001177519:c.*72T>C) | 3 (1)                                        | 15 (8)                                           | 9 (3)                                            | NA                                               | 0                             | NA                                                                                                                                                                                                                                                                                                                       |
| 6   | ((rs241437=G) or (rs3129299=C)) or (rs9276909=C)      | rs241437   | 32797684            | intronic     | <i>TAP2</i>                                                                                                            | 0 (0)                                        | 10 (7)                                           | 5 (1)                                            | T-REx-HEK293 (ZNF263)                            | 1                             | Whole Blood ( <i>HLA-DMA</i> , <i>HLA-DOB</i> , <i>HLA-DRB5</i> , <i>PSMB9</i> , <i>TAP2</i> ); Liver ( <i>HLA-DRB5</i> )                                                                                                                                                                                                |
| 6   | ((rs241437=G) or (rs3129299=C)) or (rs9276909=C)      | rs3129299  | 32900787            | intergenic   | <i>LOC100294145</i> (dist=29252), <i>HLA-DMB</i> (dist=1619)                                                           | 0 (0)                                        | 28 (11)                                          | 9 (2)                                            | NA                                               | 2                             | Whole Blood ( <i>HLA-DMA</i> , <i>TAP2</i> )                                                                                                                                                                                                                                                                             |
| 6   | ((rs241437=G) or (rs3129299=C)) or (rs9276909=C)      | rs9276909  | 32850839            | intergenic   | <i>PSMB9</i> (dist=23211), <i>LOC100294145</i> (dist=11114)                                                            | 13 (0)                                       | 29 (2)                                           | 9 (1)                                            | MCF10A-Er-Src (STAT3)                            | 0                             | Whole Blood ( <i>HLA-DMA</i> , <i>HLA-DPB1</i> , <i>PSMB9</i> , <i>PSMB9</i> ); Lymphoblastoid ( <i>PSMB9</i> )                                                                                                                                                                                                          |
| 6   | ((rs2395194=G) and (rs16870908=G)) or (rs9268831=T)   | rs2395194  | 32447953            | intergenic   | <i>HLA-DRA</i> (dist=35127), <i>HLA-DRB5</i> (dist=37201)                                                              | 0 (0)                                        | 0 (0)                                            | 0 (0)                                            | NA                                               | 0                             | NA                                                                                                                                                                                                                                                                                                                       |
| 6   | ((rs2395194=G) and (rs16870908=G)) or (rs9268831=T)   | rs16870908 | 32790089            | exonic       | <i>TAP2</i>                                                                                                            | 0 (0)                                        | 5 (3)                                            | 2 (2)                                            | NA                                               | 1                             | Whole Blood ( <i>HLA-DMB</i> , <i>HLA-DOA</i> , <i>HLA-DOB</i> , <i>PSMB8</i> , <i>PSMB9</i> , <i>TAP2</i> )                                                                                                                                                                                                             |
| 6   | ((rs2395194=G) and (rs16870908=G)) or (rs9268831=T)   | rs9268831  | 32427748            | intergenic   | <i>HLA-DRA</i> (dist=14922), <i>HLA-DRB5</i> (dist=57406)                                                              | 5 (1)                                        | 31 (19)                                          | 71 (16)                                          | GM18951 (POL2); MCF-7 (CMYC, HAE2F1, POL2)       | 1                             | Whole Blood ( <i>HLA-DQA1</i> , <i>HLA-DQA2</i> , <i>HLA-DQB1</i> , <i>HLA-DQB1-AS1</i> , <i>HLA-DQB2</i> , <i>HLA-DRB1</i> , <i>HLA-DRB6</i> , <i>HLA-DRB9</i> ); Lymphoblastoid ( <i>HLA-DQA2</i> , <i>HLA-DQB2</i> , <i>HLA-DRB6</i> , <i>HLA-DRB9</i> , <i>NOTCH4</i> ); Liver ( <i>HLA-DQA2</i> , <i>HLA-DQB2</i> ) |
| 6   | ((rs9268213=A) and (rs41546114=C)) or (rs3132947=G)   | rs9268213  | 32282081            | intronic     | <i>C6orf10</i>                                                                                                         | 0 (0)                                        | 7 (0)                                            | 0 (0)                                            | NA                                               | 2                             | Whole Blood ( <i>C4A</i> , <i>C4B</i> , <i>HLA-DRB5</i> ); Lymphoblastoid ( <i>HLA-DQB1</i> ); Liver ( <i>C4A</i> , <i>CYP21A1P</i> , <i>HLA-DMA</i> )                                                                                                                                                                   |
| 6   | ((rs9268213=A) and (rs41546114=C)) or (rs3132947=G)   | rs41546114 | 31382831            | exonic; UTR3 | <i>MICA</i> ; <i>MICA</i> (NM_001289152:c.*72T>C, NM_001289153:c.*72T>C, NM_001289154:c.*72T>C, NM_001177519:c.*72T>C) | 3 (1)                                        | 15 (8)                                           | 9 (3)                                            | NA                                               | 0                             | NA                                                                                                                                                                                                                                                                                                                       |

| Chr | 3-SNP Haplotype                                     | SNP        | Chr position (hg19) | Ontology   | Mapped Gene                                                  | DHS overlap <sup>a</sup> , # EIDs (PBC EIDs) | H3K4me1 overlap <sup>a</sup> , # EIDs (PBC EIDs) | H3K4me3 overlap <sup>a</sup> , # EIDs (PBC EIDs) | Bound protein <sup>b</sup> : Cell line (protein)                                                                                                                                                                                                                                                                                                              | # Altered motifs <sup>c</sup> | Significant eQTLs <sup>d</sup> : Tissue (gene)                                                                                                                                                                                                                                                     |
|-----|-----------------------------------------------------|------------|---------------------|------------|--------------------------------------------------------------|----------------------------------------------|--------------------------------------------------|--------------------------------------------------|---------------------------------------------------------------------------------------------------------------------------------------------------------------------------------------------------------------------------------------------------------------------------------------------------------------------------------------------------------------|-------------------------------|----------------------------------------------------------------------------------------------------------------------------------------------------------------------------------------------------------------------------------------------------------------------------------------------------|
| 6   | ((rs9268213=A) and (rs41546114=C)) or (rs3132947=G) | rs3132947  | 32176782            | intronic   | <i>NOTCH4</i>                                                | 0 (0)                                        | 2 (1)                                            | 4 (0)                                            | NA                                                                                                                                                                                                                                                                                                                                                            | 3                             | Whole Blood ( <i>AGPAT1</i> , <i>C4A</i> , <i>C4B</i> , <i>CYP21A1P</i> , <i>HLA-DRA</i> , <i>PBX2</i> , <i>SKIV2L</i> ); Lymphoblastoid ( <i>C4A</i> , <i>HLA-DQA1</i> , <i>RNF5</i> ); Liver ( <i>AGPAT1</i> , <i>RNF5</i> )                                                                     |
| 6   | ((rs4538748=C) or (rs2064476=G)) and (rs35344500=A) | rs4538748  | 32657505            | intergenic | <i>HLA-DQB1</i> (dist=23039), <i>HLA-DQA2</i> (dist=51658)   | 5 (5)                                        | 26 (21)                                          | 6 (4)                                            | GM10847 (NFKB); GM12878 (BATF, BCL11A, BCLAF1, IRF4, MEF2A, NFKB, OCT2, PAX5C20, PAX5N19, POL2, POL24H8, POU2F2, RFX5, SP1, SRF, TAF1, TBP, YY1); GM12891 (NFKB, OCT2, PAX5C20, POL2, POL24H8, POU2F2, TAF1, YY1); GM12892 (NFKB, PAX5C20, POL2, POL24H8, TAF1, YY1); GM15510 (NFKB); GM18505 (NFKB, POL2); GM18951 (NFKB); GM19099 (NFKB, POL2); Raji (POL2) | 2                             | Whole Blood ( <i>CYP21A1P</i> , <i>HLA-DOB</i> , <i>HLA-DQA1</i> , <i>HLA-DQA2</i> , <i>HLA-DQB1</i> , <i>HLA-DQB2</i> ); Lymphoblastoid ( <i>HLA-DQA2</i> , <i>HLA-DQB2</i> , <i>NOTCH4</i> ); Liver ( <i>HLA-DQB2</i> )                                                                          |
| 6   | ((rs4538748=C) or (rs2064476=G)) and (rs35344500=A) | rs2064476  | 33073322            | intergenic | <i>HLA-DPB1</i> (dist=15849), <i>HLA-DPB2</i> (dist=6971)    | 0 (0)                                        | 8 (3)                                            | 3 (0)                                            | NA                                                                                                                                                                                                                                                                                                                                                            | 3                             | Whole Blood ( <i>HLA-DPB2</i> , <i>RPL32P1</i> ); Lymphoblastoid ( <i>RPL32P1</i> )                                                                                                                                                                                                                |
| 6   | ((rs4538748=C) or (rs2064476=G)) and (rs35344500=A) | rs35344500 | 32609525            | intronic   | <i>HLA-DQA1</i>                                              | 1 (1)                                        | 20 (15)                                          | 8 (6)                                            | NA                                                                                                                                                                                                                                                                                                                                                            | 0                             | Whole Blood ( <i>HLA-DQA1</i> , <i>HLA-DQB1</i> , <i>HLA-DQB2</i> , <i>HLA-DRB1</i> , <i>HLA-DRB5</i> , <i>PSMB9</i> ); Lymphoblastoid ( <i>C4A</i> , <i>HLA-DQB2</i> , <i>HLA-DRB1</i> , <i>HLA-DRB9</i> ); Liver ( <i>C4A</i> , <i>HLA-DMA</i> , <i>HLA-DQB1</i> , <i>STK19P</i> , <i>TNXA</i> ) |
| 6   | ((rs2244027=A) or (rs2242665=C)) or (rs2071591=G)   | rs2244027  | 31347566            | intergenic | <i>HLA-B</i> (dist=22577), <i>MICA</i> (dist=19995)          | 1 (0)                                        | 16 (0)                                           | 8 (1)                                            | NA                                                                                                                                                                                                                                                                                                                                                            | 2                             | Whole Blood ( <i>HLA-C</i> , <i>MICA</i> , <i>MICB</i> )                                                                                                                                                                                                                                           |
| 6   | ((rs2244027=A) or (rs2242665=C)) or (rs2071591=G)   | rs2242665  | 31839309            | exonic     | <i>SLC44A4</i>                                               | 0 (0)                                        | 55 (8)                                           | 22 (3)                                           | NA                                                                                                                                                                                                                                                                                                                                                            | 0                             | Whole Blood ( <i>C6orf48</i> , <i>CSNK2B</i> , <i>CYP21A1P</i> , <i>HLA-DQA2</i> , <i>HLA-DQB2</i> , <i>HLA-DRB6</i> , <i>HSPA1B</i> , <i>RDBP</i> , <i>SKIV2L</i> ); Lymphoblastoid ( <i>SKIV2L</i> )                                                                                             |
| 6   | ((rs2244027=A) or (rs2242665=C)) or (rs2071591=G)   | rs2071591  | 31515799            | intronic   | <i>NFKBIL1</i>                                               | 1 (1)                                        | 120 (29)                                         | 123 (26)                                         | NA                                                                                                                                                                                                                                                                                                                                                            | 0                             | Whole Blood ( <i>AIF1</i> , <i>BAT1</i> , <i>CSNK2B</i> , <i>DDX39B</i> , <i>HCP5</i> , <i>HLA-DRB5</i> , <i>LST1</i> , <i>TNF</i> )                                                                                                                                                               |
| 6   | ((rs9296088=A) and (rs12207818=C)) and (rs181997=A) | rs9296088  | 33125742            | intergenic | <i>HLA-DPB2</i> (dist=28852), <i>COL11A2</i> (dist=4727)     | 0 (0)                                        | 6 (2)                                            | 4 (2)                                            | NA                                                                                                                                                                                                                                                                                                                                                            | 6                             | NA                                                                                                                                                                                                                                                                                                 |
| 6   | ((rs9296088=A) and (rs12207818=C)) and (rs181997=A) | rs12207818 | 33809805            | intergenic | <i>MLN</i> (dist=38012), <i>LINC01016</i> (dist=47483)       | 0 (0)                                        | 42 (10)                                          | 11 (1)                                           | K562 (TFIIIC110)                                                                                                                                                                                                                                                                                                                                              | 1                             | NA                                                                                                                                                                                                                                                                                                 |
| 6   | ((rs9296088=A) and (rs12207818=C)) and (rs181997=A) | rs181997   | 32900718            | intergenic | <i>LOC100294145</i> (dist=29183), <i>HLA-DMB</i> (dist=1688) | 0 (0)                                        | 28 (11)                                          | 10 (2)                                           | NA                                                                                                                                                                                                                                                                                                                                                            | 4                             | Whole Blood ( <i>HLA-DMA</i> , <i>TAP2</i> )                                                                                                                                                                                                                                                       |
| 6   | ((rs2071287=C) and (rs3094596=C)) or (rs185819=C)   | rs2071287  | 32170433            | intronic   | <i>NOTCH4</i>                                                | 1 (0)                                        | 17 (1)                                           | 8 (1)                                            | NA                                                                                                                                                                                                                                                                                                                                                            | 1                             | Whole Blood ( <i>GPSM3</i> ), <i>NOTCH4</i> , <i>HLA-DRA</i> , <i>SKIV2L</i> ); Lymphoblastoid ( <i>HLA-DQA1</i> ); Liver ( <i>AGPAT1</i> )                                                                                                                                                        |
| 6   | ((rs2071287=C) and (rs3094596=C)) or (rs185819=C)   | rs3094596  | 31350579            | intergenic | <i>HLA-B</i> (dist=25590), <i>MICA</i> (dist=16982)          | 0 (0)                                        | 3 (0)                                            | 2 (0)                                            | NA                                                                                                                                                                                                                                                                                                                                                            | 3                             | Whole Blood ( <i>AIF1</i> , <i>ATP6V1G2</i> ), <i>BAT1</i> , <i>HCP5</i> , <i>LST1</i> , <i>LTA</i> , <i>MICB</i> )                                                                                                                                                                                |



| Chr | 3-SNP Haplotype                                      | SNP        | Chr position (hg19) | Ontology     | Mapped Gene                                                                                                            | DHS overlap <sup>a</sup> , # EIDs (PBC EIDs) | H3K4me1 overlap <sup>a</sup> , # EIDs (PBC EIDs) | H3K4me3 overlap <sup>a</sup> , # EIDs (PBC EIDs) | Bound protein <sup>b</sup> : Cell line (protein) | # Altered motifs <sup>c</sup> | Significant eQTLs <sup>d</sup> : Tissue (gene)                                                                                                                                                                                 |
|-----|------------------------------------------------------|------------|---------------------|--------------|------------------------------------------------------------------------------------------------------------------------|----------------------------------------------|--------------------------------------------------|--------------------------------------------------|--------------------------------------------------|-------------------------------|--------------------------------------------------------------------------------------------------------------------------------------------------------------------------------------------------------------------------------|
| 6   | ((rs2071287=C) and (rs3094596=C)) or (rs185819=C)    | rs185819   | 32050067            | exonic       | <i>TNXB</i>                                                                                                            | 2 (0)                                        | 70 (1)                                           | 34 (2)                                           | NA                                               | 4                             | Whole Blood ( <i>CYP21A1P</i> , <i>GPSM3</i> ); <i>NOTCH4</i> , <i>HLA-DQA2</i> , <i>HLA-DQB2</i> , <i>HLA-DRB6</i> , <i>SKIV2L</i> ); Liver ( <i>CYP21A1P</i> )                                                               |
| 6   | ((rs3132947=T) and ((rs404860=C) or (rs41546114=T))) | rs3132947  | 32176782            | intronic     | <i>NOTCH4</i>                                                                                                          | 0 (0)                                        | 2 (1)                                            | 4 (0)                                            | NA                                               | 3                             | Whole Blood ( <i>AGPAT1</i> , <i>C4A</i> , <i>C4B</i> , <i>CYP21A1P</i> , <i>HLA-DRA</i> , <i>PBX2</i> , <i>SKIV2L</i> ); Lymphoblastoid ( <i>C4A</i> , <i>HLA-DQA1</i> , <i>RNF5</i> ); Liver ( <i>AGPAT1</i> , <i>RNF5</i> ) |
| 6   | ((rs3132947=T) and ((rs404860=C) or (rs41546114=T))) | rs404860   | 32184345            | intronic     | <i>NOTCH4</i>                                                                                                          | 0 (0)                                        | 5 (1)                                            | 3 (0)                                            | NA                                               | 0                             | NA                                                                                                                                                                                                                             |
| 6   | ((rs3132947=T) and ((rs404860=C) or (rs41546114=T))) | rs41546114 | 31382831            | exonic; UTR3 | <i>MICA</i> ; <i>MICA</i> (NM_001289152:c.*72T>C, NM_001289153:c.*72T>C, NM_001289154:c.*72T>C, NM_001177519:c.*72T>C) | 3 (1)                                        | 15 (8)                                           | 9 (3)                                            | NA                                               | 0                             | NA                                                                                                                                                                                                                             |
| 6   | ((rs11754586=T) or ((rs3131932=G) or (rs9262537=G))) | rs11754586 | 31001911            | intronic     | <i>MUC22</i>                                                                                                           | 0 (0)                                        | 1 (0)                                            | 1 (0)                                            | NA                                               | 3                             | Whole Blood ( <i>VARSL</i> ); Lymphoblastoid ( <i>VARSL</i> )                                                                                                                                                                  |
| 6   | ((rs11754586=T) or ((rs3131932=G) or (rs9262537=G))) | rs3131932  | 30940328            | intergenic   | <i>DPCR1</i> (dist=18330), <i>MUC21</i> (dist=11157)                                                                   | 0 (0)                                        | 9 (0)                                            | 5 (0)                                            | NA                                               | 2                             | Whole Blood ( <i>CCHCR1</i> , <i>FLOT1</i> , <i>IER3</i> , <i>LINC00243</i> , <i>VARSL</i> )                                                                                                                                   |
| 6   | ((rs11754586=T) or ((rs3131932=G) or (rs9262537=G))) | rs9262537  | 30990224            | intronic     | <i>MUC22</i>                                                                                                           | 0 (0)                                        | 1 (0)                                            | 1 (0)                                            | NA                                               | 1                             | Whole Blood ( <i>HLA-S</i> )                                                                                                                                                                                                   |
| 6   | ((rs10947251=A) or (rs41546114=T)) and (rs3132947=T) | rs10947251 | 32261952            | intronic     | <i>C6orf10</i>                                                                                                         | 0 (0)                                        | 1 (0)                                            | 0 (0)                                            | NA                                               | 1                             | Lymphoblastoid ( <i>C2</i> )                                                                                                                                                                                                   |
| 6   | ((rs10947251=A) or (rs41546114=T)) and (rs3132947=T) | rs41546114 | 31382831            | exonic; UTR3 | <i>MICA</i> ; <i>MICA</i> (NM_001289152:c.*72T>C, NM_001289153:c.*72T>C, NM_001289154:c.*72T>C, NM_001177519:c.*72T>C) | 3 (1)                                        | 15 (8)                                           | 9 (3)                                            | NA                                               | 0                             | NA                                                                                                                                                                                                                             |
| 6   | ((rs10947251=A) or (rs41546114=T)) and (rs3132947=T) | rs3132947  | 32176782            | intronic     | <i>NOTCH4</i>                                                                                                          | 0 (0)                                        | 2 (1)                                            | 4 (0)                                            | NA                                               | 3                             | Whole Blood ( <i>AGPAT1</i> , <i>C4A</i> , <i>C4B</i> , <i>CYP21A1P</i> , <i>HLA-DRA</i> , <i>PBX2</i> , <i>SKIV2L</i> ); Lymphoblastoid ( <i>C4A</i> , <i>HLA-DQA1</i> , <i>RNF5</i> ); Liver ( <i>AGPAT1</i> , <i>RNF5</i> ) |
| 6   | ((rs3132947=G) or (rs9266632=G)) or (rs185819=C)     | rs3132947  | 32176782            | intronic     | <i>NOTCH4</i>                                                                                                          | 0 (0)                                        | 2 (1)                                            | 4 (0)                                            | NA                                               | 3                             | Whole Blood ( <i>AGPAT1</i> , <i>C4A</i> , <i>C4B</i> , <i>CYP21A1P</i> , <i>HLA-DRA</i> , <i>PBX2</i> , <i>SKIV2L</i> ); Lymphoblastoid ( <i>C4A</i> , <i>HLA-DQA1</i> , <i>RNF5</i> ); Liver ( <i>AGPAT1</i> , <i>RNF5</i> ) |
| 6   | ((rs3132947=G) or (rs9266632=G)) or (rs185819=C)     | rs9266632  | 31346902            | intergenic   | <i>HLA-B</i> (dist=21913), <i>MICA</i> (dist=20659)                                                                    | 1 (1)                                        | 17 (1)                                           | 11 (1)                                           | NA                                               | 2                             | Whole Blood ( <i>HLA-C</i> , <i>PSORS1C3</i> ); Lymphoblastoid ( <i>PSORS1C3</i> )                                                                                                                                             |
| 6   | ((rs3132947=G) or (rs9266632=G)) or (rs185819=C)     | rs185819   | 32050067            | exonic       | <i>TNXB</i>                                                                                                            | 2 (0)                                        | 70 (1)                                           | 34 (2)                                           | NA                                               | 4                             | Whole Blood ( <i>CYP21A1P</i> , <i>GPSM3</i> ); <i>NOTCH4</i> , <i>HLA-DQA2</i> , <i>HLA-DQB2</i> , <i>HLA-DRB6</i> , <i>SKIV2L</i> ); Liver ( <i>CYP21A1P</i> )                                                               |
| 6   | ((rs805273=A) and ((rs805267=G) or (rs9266774=T)))   | rs805273   | 31665452            | intronic     | <i>ABHD16A</i>                                                                                                         | 1 (0)                                        | 52 (17)                                          | 24 (2)                                           | NA                                               | 5                             | Whole Blood ( <i>AIF1</i> , <i>LY6G5B</i> , <i>LY6G5C</i> )                                                                                                                                                                    |

| Chr | 3-SNP Haplotype                                      | SNP       | Chr position (hg19) | Ontology             | Mapped Gene                                         | DHS overlap <sup>a</sup> , # EIDs (PBC EIDs) | H3K4me1 overlap <sup>a</sup> , # EIDs (PBC EIDs) | H3K4me3 overlap <sup>a</sup> , # EIDs (PBC EIDs) | Bound protein <sup>b</sup> : Cell line (protein)                                                                                            | # Altered motifs <sup>c</sup> | Significant eQTLs <sup>d</sup> : Tissue (gene)                                                                                                                                                       |
|-----|------------------------------------------------------|-----------|---------------------|----------------------|-----------------------------------------------------|----------------------------------------------|--------------------------------------------------|--------------------------------------------------|---------------------------------------------------------------------------------------------------------------------------------------------|-------------------------------|------------------------------------------------------------------------------------------------------------------------------------------------------------------------------------------------------|
| 6   | ((rs805273=A) and ((rs805267=G) or (rs9266774=T)))   | rs805267  | 31639757            | exonic               | LY6G5B                                              | 1 (0)                                        | 23 (8)                                           | 16 (2)                                           | HepG2 (POL2)                                                                                                                                | 3                             | Whole Blood ( <i>AIF1</i> , <i>LY6G5B</i> )                                                                                                                                                          |
| 6   | ((rs805273=A) and ((rs805267=G) or (rs9266774=T)))   | rs9266774 | 31352880            | intergenic           | <i>HLA-B</i> (dist=27891), <i>MICA</i> (dist=14681) | 1 (1)                                        | 7 (0)                                            | 10 (1)                                           | NA                                                                                                                                          | 5                             | Whole Blood ( <i>HLA-C</i> , <i>LTA</i> , <i>MICA</i> , <i>MICB</i> )                                                                                                                                |
| 6   | ((rs3828901=A) or ((rs707921=A) and (rs9266774=T)))  | rs3828901 | 31463718            | intronic             | <i>MICB</i>                                         | 8 (0)                                        | 101 (29)                                         | 94 (29)                                          | HUVEC (CFOS)                                                                                                                                | 1                             | NA                                                                                                                                                                                                   |
| 6   | ((rs3828901=A) or ((rs707921=A) and (rs9266774=T)))  | rs707921  | 31625541            | intronic             | <i>APOM</i>                                         | 4 (4)                                        | 112 (28)                                         | 70 (15)                                          | HepG2 (POL2)                                                                                                                                | 1                             | Whole Blood ( <i>AIF1</i> , <i>LY6G5B</i> )                                                                                                                                                          |
| 6   | ((rs3828901=A) or ((rs707921=A) and (rs9266774=T)))  | rs9266774 | 31352880            | intergenic           | <i>HLA-B</i> (dist=27891), <i>MICA</i> (dist=14681) | 1 (1)                                        | 7 (0)                                            | 10 (1)                                           | NA                                                                                                                                          | 5                             | Whole Blood ( <i>HLA-C</i> , <i>LTA</i> , <i>MICA</i> , <i>MICB</i> )                                                                                                                                |
| 6   | ((rs3828901=G) and ((rs805268=A) or (rs9266774=C)))  | rs3828901 | 31463718            | intronic             | <i>MICB</i>                                         | 8 (0)                                        | 101 (29)                                         | 94 (29)                                          | HUVEC (CFOS)                                                                                                                                | 1                             | NA                                                                                                                                                                                                   |
| 6   | ((rs3828901=G) and ((rs805268=A) or (rs9266774=C)))  | rs805268  | 31638178            | upstream; downstream | <i>LY6G5B</i> ; <i>CSNK2B</i>                       | 0 (0)                                        | 42 (14)                                          | 37 (5)                                           | NA                                                                                                                                          | 0                             | Whole Blood ( <i>AIF1</i> )                                                                                                                                                                          |
| 6   | ((rs3828901=G) and ((rs805268=A) or (rs9266774=C)))  | rs9266774 | 31352880            | intergenic           | <i>HLA-B</i> (dist=27891), <i>MICA</i> (dist=14681) | 1 (1)                                        | 7 (0)                                            | 10 (1)                                           | NA                                                                                                                                          | 5                             | Whole Blood ( <i>HLA-C</i> , <i>LTA</i> , <i>MICA</i> , <i>MICB</i> )                                                                                                                                |
| 6   | ((rs3828901=A) or ((rs3828919=A) and (rs2523497=T))) | rs3828901 | 31463718            | intronic             | <i>MICB</i>                                         | 8 (0)                                        | 101 (29)                                         | 94 (29)                                          | HUVEC (CFOS)                                                                                                                                | 1                             | NA                                                                                                                                                                                                   |
| 6   | ((rs3828901=A) or ((rs3828919=A) and (rs2523497=T))) | rs3828919 | 31466057            | intronic             | <i>MICB</i>                                         | 12 (5)                                       | 111 (28)                                         | 125 (29)                                         | GM12878 (POL2, ZEB1); GM12892 (POL2); GM19099 (POL2); H1-hESC (TAF1, TBP); HepG2 (HEY1, TAF1); K562 (CCNT2, ELF1, GABP, NRSF, POL2, ZBTB7A) | 4                             | Whole Blood ( <i>MICB</i> )                                                                                                                                                                          |
| 6   | ((rs3828901=A) or ((rs3828919=A) and (rs2523497=T))) | rs2523497 | 31376928            | intronic             | <i>MICA</i>                                         | 0 (0)                                        | 60 (18)                                          | 5 (1)                                            | NA                                                                                                                                          | 3                             | Whole Blood ( <i>AIF1</i> , <i>HCG27</i> , <i>MICB</i> , <i>NOTCH4</i> ); Lymphoblastoid ( <i>MICA</i> ); Liver ( <i>MICA</i> )                                                                      |
| 6   | ((rs707922=G) or ((rs1046089=A) and (rs9266774=C)))  | rs707922  | 31625507            | intronic             | <i>APOM</i>                                         | 3 (3)                                        | 112 (28)                                         | 69 (15)                                          | HepG2 (POL2)                                                                                                                                | 5                             | Whole Blood ( <i>AIF1</i> , <i>LY6G5B</i> , <i>LY6G5C</i> )                                                                                                                                          |
| 6   | ((rs707922=G) or ((rs1046089=A) and (rs9266774=C)))  | rs1046089 | 31602967            | exonic               | <i>PRRC2A</i>                                       | 0 (0)                                        | 38 (9)                                           | 23 (2)                                           | HepG2 (POL2)                                                                                                                                | 0                             | Whole Blood ( <i>AIF1</i> , <i>C4A</i> , <i>C4B</i> , <i>HCP5</i> , <i>HLA-DRB5</i> , <i>HSPA1B</i> , <i>LY6G5B</i> , <i>LY6G5C</i> ); Lymphoblastoid ( <i>HLA-DRB5</i> ); Liver ( <i>HLA-DRB5</i> ) |
| 6   | ((rs707922=G) or ((rs1046089=A) and (rs9266774=C)))  | rs9266774 | 31352880            | intergenic           | <i>HLA-B</i> (dist=27891), <i>MICA</i> (dist=14681) | 1 (1)                                        | 7 (0)                                            | 10 (1)                                           | NA                                                                                                                                          | 5                             | Whole Blood ( <i>HLA-C</i> , <i>LTA</i> , <i>MICA</i> , <i>MICB</i> )                                                                                                                                |

| Chr | 3-SNP Haplotype                                    | SNP        | Chr position (hg19) | Ontology   | Mapped Gene                                               | DHS overlap <sup>a</sup> , # EIDs (PBC EIDs) | H3K4me1 overlap <sup>a</sup> , # EIDs (PBC EIDs) | H3K4me3 overlap <sup>a</sup> , # EIDs (PBC EIDs) | Bound protein <sup>b</sup> : Cell line (protein)                                                                                                                                   | # Altered motifs <sup>c</sup> | Significant eQTLs <sup>d</sup> : Tissue (gene)                                                                                                                                                            |
|-----|----------------------------------------------------|------------|---------------------|------------|-----------------------------------------------------------|----------------------------------------------|--------------------------------------------------|--------------------------------------------------|------------------------------------------------------------------------------------------------------------------------------------------------------------------------------------|-------------------------------|-----------------------------------------------------------------------------------------------------------------------------------------------------------------------------------------------------------|
| 6   | ((rs3131932=G) or (rs28360042=C)) or (rs885950=C)  | rs3131932  | 30940328            | intergenic | <i>DPCR1</i> (dist=18330),<br><i>MUC21</i> (dist=11157)   | 0 (0)                                        | 9 (0)                                            | 5 (0)                                            | NA                                                                                                                                                                                 | 2                             | Whole Blood ( <i>CCHCR1</i> , <i>FLOT1</i> , <i>IER3</i> , <i>LINC00243</i> , <i>VARSL</i> )                                                                                                              |
| 6   | ((rs3131932=G) or (rs28360042=C)) or (rs885950=C)  | rs28360042 | 31001781            | intronic   | <i>MUC22</i>                                              | 0 (0)                                        | 1 (0)                                            | 1 (0)                                            | NA                                                                                                                                                                                 | 4                             | Whole Blood ( <i>HCG27</i> , <i>HLA-C</i> , <i>POU5F1</i> , <i>PSORS1C3</i> ); Lymphoblastoid ( <i>CCHCR1</i> , <i>HLA-C</i> , <i>PSORS1C3</i> , <i>TCF19</i> ); Liver ( <i>HLA-C</i> , <i>PSORS1C3</i> ) |
| 6   | ((rs3131932=G) or (rs28360042=C)) or (rs885950=C)  | rs885950   | 31140152            | intergenic | <i>POU5F1</i> (dist=1682),<br><i>PSORS1C3</i> (dist=1360) | 5 (0)                                        | 40 (0)                                           | 25 (2)                                           | H1-hESC (POL2)                                                                                                                                                                     | 6                             | Whole Blood ( <i>HCG27</i> , <i>VARSL</i> )                                                                                                                                                               |
| 6   | ((rs9266774=T) and (rs2255741=A)) or (rs3828901=A) | rs9266774  | 31352880            | intergenic | <i>HLA-B</i> (dist=27891),<br><i>MICA</i> (dist=14681)    | 1 (1)                                        | 7 (0)                                            | 10 (1)                                           | NA                                                                                                                                                                                 | 5                             | Whole Blood ( <i>HLA-C</i> , <i>LTA</i> , <i>MICA</i> , <i>MICB</i> )                                                                                                                                     |
| 6   | ((rs9266774=T) and (rs2255741=A)) or (rs3828901=A) | rs2255741  | 31605167            | intronic   | <i>PRRC2A</i>                                             | 12 (3)                                       | 45 (7)                                           | 14 (0)                                           | GM12878 (POL2); K562 (POL2, POL24H8)                                                                                                                                               | 2                             | Whole Blood ( <i>AIF1</i> )                                                                                                                                                                               |
| 6   | ((rs9266774=T) and (rs2255741=A)) or (rs3828901=A) | rs3828901  | 31463718            | intronic   | <i>MICB</i>                                               | 8 (0)                                        | 101 (29)                                         | 94 (29)                                          | HUVEC (CFOS)                                                                                                                                                                       | 1                             | NA                                                                                                                                                                                                        |
| 6   | (rs3749946=A) and (rs2517506=T) and (rs7741091=A)  | rs3749946  | 31448862            | intergenic | <i>HCG26</i> (dist=8677),<br><i>MICB</i> (dist=13796)     | 0 (0)                                        | 8 (3)                                            | 3 (1)                                            | NA                                                                                                                                                                                 | 3                             | Whole Blood ( <i>HCP5</i> , <i>LST1</i> , <i>MICB</i> )                                                                                                                                                   |
| 6   | (rs3749946=A) and (rs2517506=T) and (rs7741091=A)  | rs2517506  | 31031680            | intergenic | <i>HCG22</i> (dist=4025),<br><i>C6orf15</i> (dist=47320)  | 0 (0)                                        | 13 (0)                                           | 1 (1)                                            | NA                                                                                                                                                                                 | 1                             | Whole Blood ( <i>CCHCR1</i> , <i>FLOT1</i> , <i>HLA-L</i> , <i>MICB</i> )                                                                                                                                 |
| 6   | (rs3749946=A) and (rs2517506=T) and (rs7741091=A)  | rs7741091  | 31352631            | intergenic | <i>HLA-B</i> (dist=27642),<br><i>MICA</i> (dist=14930)    | 0 (0)                                        | 7 (0)                                            | 10 (1)                                           | NA                                                                                                                                                                                 | 2                             | Whole Blood ( <i>ATP6V1G2 BAT1</i> , <i>HCG27</i> , <i>HLA-C</i> , <i>HLA-S</i> , <i>MICA</i> , <i>MICB</i> , <i>NOTCH4</i> , <i>ZBTB12</i> ); Liver ( <i>MICA</i> )                                      |
| 6   | (rs3828901=G) and (rs12110785=T) or (rs2523644=T)) | rs3828901  | 31463718            | intronic   | <i>MICB</i>                                               | 8 (0)                                        | 101 (29)                                         | 94 (29)                                          | HUVEC (CFOS)                                                                                                                                                                       | 1                             | NA                                                                                                                                                                                                        |
| 6   | (rs3828901=G) and (rs12110785=T) or (rs2523644=T)) | rs12110785 | 30997824            | exonic     | <i>MUC22</i>                                              | 0 (0)                                        | 3 (0)                                            | 3 (0)                                            | NA                                                                                                                                                                                 | 1                             | NA                                                                                                                                                                                                        |
| 6   | (rs3828901=G) and (rs12110785=T) or (rs2523644=T)) | rs2523644  | 31342484            | intergenic | <i>HLA-B</i> (dist=17495),<br><i>MICA</i> (dist=25077)    | 0 (0)                                        | 2 (0)                                            | 2 (0)                                            | HeLa-S3 (CTCF)                                                                                                                                                                     | 2                             | Whole Blood ( <i>AIF1</i> , <i>ATP6V1G2 BAT1</i> , <i>HCG27</i> , <i>HCP5</i> , <i>LTA</i> , <i>MICB</i> ); Lymphoblastoid ( <i>HCG27</i> ); Liver ( <i>HLA-C</i> )                                       |
| 6   | ((rs2239888=T) or (rs3134769=C)) and (rs3828901=G) | rs2239888  | 30649912            | intronic   | <i>PPP1R18</i>                                            | 20 (6)                                       | 125 (29)                                         | 120 (29)                                         | GM12878 (PU1); GM12891 (PU1); HUVEC (CFOS); HeLa-S3 (INI1, JUN, STAT1, TBP); HepG2 (JUND); K562 (CJUN, CMYC, FOSL1, JUNB, POL2, STAT1, STAT2, TAF1, ZBTB7A); MCF10A-Er-Src (STAT3) | 2                             | NA                                                                                                                                                                                                        |
| 6   | ((rs2239888=T) or (rs3134769=C)) and (rs3828901=G) | rs3134769  | 31205754            | intergenic | <i>HCG27</i> (dist=34009),<br><i>HLA-C</i> (dist=30772)   | 0 (0)                                        | 0 (0)                                            | 0 (0)                                            | NA                                                                                                                                                                                 | 1                             | Whole Blood ( <i>CCHCR1</i> , <i>HCG27</i> ); Lymphoblastoid ( <i>C4B</i> ); Liver ( <i>HCG27</i> )                                                                                                       |

| Chr | 3-SNP Haplotype                                        | SNP        | Chr position (hg19) | Ontology       | Mapped Gene                                                    | DHS overlap <sup>a</sup> , # EIDs (PBC EIDs) | H3K4me1 overlap <sup>a</sup> , # EIDs (PBC EIDs) | H3K4me3 overlap <sup>a</sup> , # EIDs (PBC EIDs) | Bound protein <sup>b</sup> : Cell line (protein)                                                                                                     | # Altered motifs <sup>c</sup> | Significant eQTLs <sup>d</sup> : Tissue (gene)                                                                                                                                                                                                                                                                                                 |
|-----|--------------------------------------------------------|------------|---------------------|----------------|----------------------------------------------------------------|----------------------------------------------|--------------------------------------------------|--------------------------------------------------|------------------------------------------------------------------------------------------------------------------------------------------------------|-------------------------------|------------------------------------------------------------------------------------------------------------------------------------------------------------------------------------------------------------------------------------------------------------------------------------------------------------------------------------------------|
| 6   | ((rs2239888=T) or (rs3134769=C)) and (rs3828901=G)     | rs3828901  | 31463718            | intronic       | <i>MICB</i>                                                    | 8 (0)                                        | 101 (29)                                         | 94 (29)                                          | HUVEC (CFOS)                                                                                                                                         | 1                             | NA                                                                                                                                                                                                                                                                                                                                             |
| 6   | ((rs2517681=T) or ((rs4148248=C) and (rs2735078=A)))   | rs2517681  | 29932330            | intergenic     | <i>HLA-A</i> (dist=18669),<br><i>HCG9</i> (dist=10562)         | 2 (0)                                        | 122 (29)                                         | 94 (25)                                          | HTB-11 (NRSF)                                                                                                                                        | 1                             | Whole Blood ( <i>HCG4P3</i> , <i>HCG4P5</i> , <i>HLA-A</i> , <i>HLA-F</i> , <i>HLA-G</i> , <i>HLA-J</i> , <i>HLA-V</i> , <i>IFITM4P</i> , <i>MICD</i> , <i>PPP1R11</i> , <i>ZFP57</i> , <i>ZNRD1</i> ); Lymphoblastoid ( <i>HCG4P5</i> , <i>IFITM4P</i> , <i>MICE</i> ); Liver ( <i>ZFP57</i> )                                                |
| 6   | (rs2517681=T) or ((rs4148248=C) and (rs2735078=A))     | rs4148248  | 30557566            | intronic       | <i>ABCF1</i>                                                   | 0 (0)                                        | 39 (6)                                           | 12 (0)                                           | NA                                                                                                                                                   | 5                             | NA                                                                                                                                                                                                                                                                                                                                             |
| 6   | ((rs2517681=T) or ((rs4148248=C) and (rs2735078=A)))   | rs2735078  | 29941400            | intergenic     | <i>HLA-A</i> (dist=27739),<br><i>HCG9</i> (dist=1492)          | 0 (0)                                        | 23 (9)                                           | 10 (2)                                           | NA                                                                                                                                                   | 0                             | Whole Blood ( <i>DDX39BP2</i> , <i>GABBR1</i> , <i>HCG4P3</i> , <i>HCG4P5</i> , <i>HLA-A</i> , <i>HLA-H</i> , <i>HLA-V</i> , <i>RANP1</i> , <i>ZFP57</i> ); Lymphoblastoid ( <i>HCG4P5</i> , <i>HCG4P7</i> , <i>HLA-A</i> , <i>HLA-H</i> , <i>HLA-K</i> , <i>ZFP57</i> ); Liver ( <i>HCG4B</i> , <i>HCG4P3</i> , <i>HLA-K</i> , <i>ZFP57</i> ) |
| 6   | ((rs17195733=G) or ((rs13201129=C) and (rs1737069=T))) | rs17195733 | 30716991            | intergenic     | <i>IER3</i> (dist=4664),<br><i>LINC00243</i> (dist=63652)      | 17 (1)                                       | 96 (11)                                          | 41 (5)                                           | A549 (GR, POL2); HCT-116 (POL24H8); HUVEC (CJUN, GATA2, POL2); HeLa-S3 (POL2); HepG2 (ELF1, FOSL2, FOXA1, FOXA2, HDAC2, HEY1, P300, POL2, RXRA, SP1) | 5                             | NA                                                                                                                                                                                                                                                                                                                                             |
| 6   | (rs17195733=G) or ((rs13201129=C) and (rs1737069=T))   | rs13201129 | 30601067            | intronic       | <i>ATAT1</i>                                                   | 0 (0)                                        | 8 (1)                                            | 6 (1)                                            | NA                                                                                                                                                   | 1                             | Whole Blood ( <i>HLA-E</i> , <i>IFITM4P</i> , <i>MRPS18B</i> , <i>NRM</i> )                                                                                                                                                                                                                                                                    |
| 6   | ((rs17195733=G) or ((rs13201129=C) and (rs1737069=T))) | rs1737069  | 29730730            | intergenic     | <i>IFITM4P</i> (dist=11805),<br><i>HCG4</i> (dist=28078)       | 3 (0)                                        | 50 (2)                                           | 10 (1)                                           | GM15510 (NFKB)                                                                                                                                       | 3                             | Whole Blood ( <i>AL645939.6-3</i> , <i>GABBR1</i> , <i>HCG9</i> , <i>HLA-F</i> , <i>HLA-F-AS1</i> , <i>HLA-G</i> , <i>HLA-H</i> , <i>HLA-J</i> , <i>IFITM4P</i> ); Lymphoblastoid ( <i>HLA-F</i> , <i>HLA-F-AS1</i> , <i>IFITM4P</i> ); Liver ( <i>HLA-A</i> , <i>HLA-F</i> )                                                                  |
| 6   | (rs3130785=T) and ((rs9261301=G) or (rs1264570=C))     | rs3130785  | 30796738            | ncRNA_intronic | <i>LINC00243</i>                                               | 10 (2)                                       | 121 (29)                                         | 82 (25)                                          | NA                                                                                                                                                   | 5                             | Whole Blood ( <i>DDR1</i> , <i>FLOT1</i> , <i>HCG9</i> , <i>HLA-H</i> , <i>HLA-J</i> , <i>HLA-L</i> , <i>IER3</i> , <i>VARS2</i> , <i>VARS1</i> ); Lymphoblastoid ( <i>HLA-J</i> ); Liver ( <i>HLA-H</i> )                                                                                                                                     |
| 6   | ((rs3130785=T) and ((rs9261301=G) or (rs1264570=C)))   | rs9261301  | 30041559            | intronic       | <i>RNF39</i>                                                   | 0 (0)                                        | 67 (11)                                          | 47 (3)                                           | NA                                                                                                                                                   | 2                             | Whole Blood ( <i>HCG4P3</i> , <i>HLA-A</i> , <i>HLA-G</i> , <i>HLA-L</i> , <i>HLA-V</i> , <i>PPP1R11</i> , <i>RPL23AP1</i> , <i>ZFP57</i> ); Lymphoblastoid ( <i>RPL23AP1</i> ); Liver ( <i>HLA-V</i> , <i>MICE</i> )                                                                                                                          |
| 6   | ((rs3130785=T) and ((rs9261301=G) or (rs1264570=C)))   | rs1264570  | 30365210            | intergenic     | <i>TRIM39-RPP21</i> (dist=50575),<br><i>HLA-E</i> (dist=91973) | 1 (1)                                        | 37 (12)                                          | 14 (1)                                           | NA                                                                                                                                                   | 2                             | Whole Blood ( <i>HLA-E</i> , <i>MRPS18B</i> , <i>RPP21</i> ); Liver ( <i>HCG4B</i> )                                                                                                                                                                                                                                                           |
| 6   | ((rs2517681=C) and ((rs3130785=T) or (rs2735078=G)))   | rs2517681  | 29932330            | intergenic     | <i>HLA-A</i> (dist=18669),<br><i>HCG9</i> (dist=10562)         | 2 (0)                                        | 122 (29)                                         | 94 (25)                                          | HTB-11 (NRSF)                                                                                                                                        | 1                             | Whole Blood ( <i>HCG4P3</i> , <i>HCG4P5</i> , <i>HLA-A</i> , <i>HLA-F</i> , <i>HLA-G</i> , <i>HLA-J</i> , <i>HLA-V</i> , <i>IFITM4P</i> , <i>MICD</i> , <i>PPP1R11</i> , <i>ZFP57</i> , <i>ZNRD1</i> ); Lymphoblastoid ( <i>HCG4P5</i> , <i>IFITM4P</i> , <i>MICE</i> ); Liver ( <i>ZFP57</i> )                                                |
| 6   | ((rs2517681=C) and ((rs3130785=T) or (rs2735078=G)))   | rs3130785  | 30796738            | ncRNA_intronic | <i>LINC00243</i>                                               | 10 (2)                                       | 121 (29)                                         | 82 (25)                                          | NA                                                                                                                                                   | 5                             | Whole Blood ( <i>DDR1</i> , <i>FLOT1</i> , <i>HCG9</i> , <i>HLA-H</i> , <i>HLA-J</i> , <i>HLA-L</i> , <i>IER3</i> , <i>VARS2</i> , <i>VARS1</i> ); Lymphoblastoid ( <i>HLA-J</i> ); Liver ( <i>HLA-H</i> )                                                                                                                                     |

| Chr | 3-SNP Haplotype                                      | SNP        | Chr position (hg19) | Ontology            | Mapped Gene                                                  | DHS overlap <sup>a</sup> , # EIDs (PBC EIDs) | H3K4me1 overlap <sup>a</sup> , # EIDs (PBC EIDs) | H3K4me3 overlap <sup>a</sup> , # EIDs (PBC EIDs) | Bound protein <sup>b</sup> : Cell line (protein) | # Altered motifs <sup>c</sup> | Significant eQTLs <sup>d</sup> : Tissue (gene)                                                                                                                                                                                                                                                                                                 |
|-----|------------------------------------------------------|------------|---------------------|---------------------|--------------------------------------------------------------|----------------------------------------------|--------------------------------------------------|--------------------------------------------------|--------------------------------------------------|-------------------------------|------------------------------------------------------------------------------------------------------------------------------------------------------------------------------------------------------------------------------------------------------------------------------------------------------------------------------------------------|
| 6   | ((rs2517681=C) and ((rs3130785=T) or (rs2735078=G))) | rs2735078  | 29941400            | intergenic          | <i>HLA-A</i> (dist=27739),<br><i>HCG9</i> (dist=1492)        | 0 (0)                                        | 23 (9)                                           | 10 (2)                                           | NA                                               | 0                             | Whole Blood ( <i>DDX39BP2</i> , <i>GABBR1</i> , <i>HCG4P3</i> , <i>HCG4P5</i> , <i>HLA-A</i> , <i>HLA-H</i> , <i>HLA-W</i> , <i>RANP1</i> , <i>ZFP57</i> ); Lymphoblastoid ( <i>HCG4P5</i> , <i>HCG4P7</i> , <i>HLA-A</i> , <i>HLA-H</i> , <i>HLA-K</i> , <i>ZFP57</i> ); Liver ( <i>HCG4B</i> , <i>HCG4P3</i> , <i>HLA-K</i> , <i>ZFP57</i> ) |
| 6   | ((rs1345229=A) or (rs1233387=T)) or (rs1003581=G)    | rs1345229  | 30182395            | intergenic          | <i>TRIM26</i> (dist=1124),<br><i>HCG17</i> (dist=19421)      | 35 (10)                                      | 118 (27)                                         | 127 (29)                                         | GM12878 (TBP)                                    | 4                             | Whole Blood ( <i>TRIM10</i> , <i>ZNRD1</i> )                                                                                                                                                                                                                                                                                                   |
| 6   | ((rs1345229=A) or (rs1233387=T)) or (rs1003581=G)    | rs1233387  | 29555864            | exonic              | <i>OR2H2</i>                                                 | 0 (0)                                        | 1 (0)                                            | 3 (0)                                            | NA                                               | 0                             | Whole Blood ( <i>HLA-F</i> , <i>HLA-G</i> , <i>TRIM27</i> ); Liver ( <i>HLA-F</i> )                                                                                                                                                                                                                                                            |
| 6   | ((rs1345229=A) or (rs1233387=T)) or (rs1003581=G)    | rs1003581  | 29540204            | intergenic          | <i>UBD</i> (dist=12502),<br><i>SNORD32B</i> (dist=9825)      | 0 (0)                                        | 0 (0)                                            | 0 (0)                                            | NA                                               | 3                             | Whole Blood ( <i>HLA-F</i> )                                                                                                                                                                                                                                                                                                                   |
| 6   | ((rs4713429=G) or (rs12110785=T)) or (rs3131932=G)   | rs4713429  | 31021017            | upstream            | <i>HCG22</i>                                                 | 2 (2)                                        | 18 (4)                                           | 11 (4)                                           | GM12878 (EBF1)                                   | 7                             | Whole Blood ( <i>VARSL</i> ); Lymphoblastoid ( <i>TCF19</i> )                                                                                                                                                                                                                                                                                  |
| 6   | ((rs4713429=G) or (rs12110785=T)) or (rs3131932=G)   | rs12110785 | 30997824            | exonic              | <i>MUC22</i>                                                 | 0 (0)                                        | 3 (0)                                            | 3 (0)                                            | NA                                               | 1                             | NA                                                                                                                                                                                                                                                                                                                                             |
| 6   | ((rs4713429=G) or (rs12110785=T)) or (rs3131932=G)   | rs3131932  | 30940328            | intergenic          | <i>DPCR1</i> (dist=18330),<br><i>MUC21</i> (dist=11157)      | 0 (0)                                        | 9 (0)                                            | 5 (0)                                            | NA                                               | 2                             | Whole Blood ( <i>CCHCR1</i> , <i>FLOT1</i> , <i>IER3</i> , <i>LINC00243</i> , <i>VARSL</i> )                                                                                                                                                                                                                                                   |
| 6   | ((rs1003581=G) and (rs16894681=T)) or (rs1233387=T)  | rs1003581  | 29540204            | intergenic          | <i>UBD</i> (dist=12502),<br><i>SNORD32B</i> (dist=9825)      | 0 (0)                                        | 0 (0)                                            | 0 (0)                                            | NA                                               | 3                             | Whole Blood ( <i>HLA-F</i> )                                                                                                                                                                                                                                                                                                                   |
| 6   | ((rs1003581=G) and (rs16894681=T)) or (rs1233387=T)  | rs16894681 | 29232072            | intergenic          | <i>OR2J2</i> (dist=89721),<br><i>OR14J1</i> (dist=42395)     | 0 (0)                                        | 0 (0)                                            | 0 (0)                                            | NA                                               | 4                             | NA                                                                                                                                                                                                                                                                                                                                             |
| 6   | ((rs1003581=G) and (rs16894681=T)) or (rs1233387=T)  | rs1233387  | 29555864            | exonic              | <i>OR2H2</i>                                                 | 0 (0)                                        | 1 (0)                                            | 3 (0)                                            | NA                                               | 0                             | Whole Blood ( <i>HLA-F</i> , <i>HLA-G</i> , <i>TRIM27</i> ); Liver ( <i>HLA-F</i> )                                                                                                                                                                                                                                                            |
| 6   | ((rs2281043=T) or (rs7751451=G)) and (rs1635=A)      | rs2281043  | 28268497            | intronic            | <i>PGBD1</i>                                                 | 0 (0)                                        | 3 (1)                                            | 2 (1)                                            | NA                                               | 3                             | Whole Blood ( <i>TRIM27</i> , <i>ZKSCAN3</i> , <i>ZNF193</i> )                                                                                                                                                                                                                                                                                 |
| 6   | ((rs2281043=T) or (rs7751451=G)) and (rs1635=A)      | rs7751451  | 28752883            | intergenic          | <i>ZBED9</i> (dist=197771),<br><i>LINC01623</i> (dist=74519) | 1 (1)                                        | 6 (0)                                            | 6 (0)                                            | NA                                               | 4                             | Whole Blood ( <i>ZFP57</i> )                                                                                                                                                                                                                                                                                                                   |
| 6   | ((rs2281043=T) or (rs7751451=G)) and (rs1635=A)      | rs1635     | 28227604            | exonic;<br>upstream | <i>NKAPL</i> ; <i>ZKSCAN4</i>                                | 0 (0)                                        | 45 (6)                                           | 72 (11)                                          | NA                                               | 0                             | NA                                                                                                                                                                                                                                                                                                                                             |
| 6   | ((rs3117192=C) or (rs16894216=T)) and (rs7773193=T)  | rs3117192  | 29401416            | intergenic          | <i>OR11A1</i> (dist=5907),<br><i>OR10C1</i> (dist=6300)      | 0 (0)                                        | 0 (0)                                            | 0 (0)                                            | NA                                               | 5                             | NA                                                                                                                                                                                                                                                                                                                                             |

| Chr | 3-SNP Haplotype                                       | SNP        | Chr position (hg19) | Ontology   | Mapped Gene                                                   | DHS overlap <sup>a</sup> , # EIDs (PBC EIDs) | H3K4me1 overlap <sup>a</sup> , # EIDs (PBC EIDs) | H3K4me3 overlap <sup>a</sup> , # EIDs (PBC EIDs) | Bound protein <sup>b</sup> : Cell line (protein)                                                                                                                                          | # Altered motifs <sup>c</sup> | Significant eQTLs <sup>d</sup> : Tissue (gene)                                                      |
|-----|-------------------------------------------------------|------------|---------------------|------------|---------------------------------------------------------------|----------------------------------------------|--------------------------------------------------|--------------------------------------------------|-------------------------------------------------------------------------------------------------------------------------------------------------------------------------------------------|-------------------------------|-----------------------------------------------------------------------------------------------------|
| 6   | ((rs3117192=C) or (rs16894216=T)) and (rs7773193=T)   | rs16894216 | 28664213            | intergenic | <i>ZBED9</i> (dist=109101),<br><i>LINC01623</i> (dist=163189) | 4 (0)                                        | 33 (6)                                           | 47 (1)                                           | NA                                                                                                                                                                                        | 3                             | NA                                                                                                  |
| 6   | ((rs3117192=C) or (rs16894216=T)) and (rs7773193=T)   | rs7773193  | 28611334            | intergenic | <i>ZBED9</i> (dist=56222),<br><i>LINC01623</i> (dist=216068)  | 31 (4)                                       | 6 (0)                                            | 24 (0)                                           | A549 (USF1); GM12878 (TBP); H1-hESC (TBP); HEK293(b) (KAP1); HeLa-S3 (AP2GAMMA, BRCA1, CEBPB, RFX5, RPC155, STAT1, TBP, TFIIC110); HepG2 (CEBPB, HSF1, TBP); K562 (RPC155, TBP, TFIIC110) | 2                             | NA                                                                                                  |
| 6   | ((rs9295704=C) and (rs2451752=A) and (rs2575174=C))   | rs9295704  | 26704816            | intergenic | <i>ZNF322</i> (dist=44836),<br><i>GUSBP2</i> (dist=134450)    | 0 (0)                                        | 13 (1)                                           | 8 (1)                                            | NA                                                                                                                                                                                        | 4                             | Whole Blood ( <i>ABT1</i> )                                                                         |
| 6   | ((rs9295704=C) and (rs2451752=A) and (rs2575174=C))   | rs2451752  | 26648013            | intronic   | <i>ZNF322</i>                                                 | 0 (0)                                        | 1 (1)                                            | 3 (1)                                            | NA                                                                                                                                                                                        | 0                             | Whole Blood ( <i>BTN3A1</i> , <i>BTN3A2</i> , <i>HMGN4</i> , <i>ZNF322</i> )                        |
| 6   | ((rs9295704=C) and (rs2451752=A) and (rs2575174=C))   | rs2575174  | 25885552            | intergenic | <i>SLC17A3</i> (dist=11081),<br><i>SLC17A2</i> (dist=27432)   | 0 (0)                                        | 5 (0)                                            | 0 (0)                                            | NA                                                                                                                                                                                        | 2                             | Whole Blood ( <i>HIST1H1T</i>   <i>HIST1H4A</i> )                                                   |
| 6   | ((rs6939576=G) or (rs2859365=G) or (rs6930033=A))     | rs6939576  | 28669315            | intergenic | <i>ZBED9</i> (dist=114203),<br><i>LINC01623</i> (dist=158087) | 0 (0)                                        | 2 (1)                                            | 1 (0)                                            | NA                                                                                                                                                                                        | 0                             | NA                                                                                                  |
| 6   | ((rs6939576=G) or (rs2859365=G) or (rs6930033=A))     | rs2859365  | 28391465            | intergenic | <i>ZSCAN12</i> (dist=23921),<br><i>ZSCAN23</i> (dist=8967)    | 0 (0)                                        | 4 (2)                                            | 0 (0)                                            | NA                                                                                                                                                                                        | 3                             | Whole Blood ( <i>TRIM27</i> , <i>ZNF187</i> , <i>ZNF193</i> );<br>Lymphoblastoid ( <i>ZSCAN23</i> ) |
| 6   | ((rs6939576=G) or (rs2859365=G) or (rs6930033=A))     | rs6930033  | 29323905            | exonic     | <i>OR5V1</i>                                                  | 0 (0)                                        | 4 (0)                                            | 1 (0)                                            | NA                                                                                                                                                                                        | 6                             | Whole Blood ( <i>TRIM27</i> )                                                                       |
| 6   | ((rs7773193=C) or (rs17280818=T) and (rs2394100=T))   | rs7773193  | 28611334            | intergenic | <i>ZBED9</i> (dist=56222),<br><i>LINC01623</i> (dist=216068)  | 31 (4)                                       | 6 (0)                                            | 24 (0)                                           | A549 (USF1); GM12878 (TBP); H1-hESC (TBP); HEK293(b) (KAP1); HeLa-S3 (AP2GAMMA, BRCA1, CEBPB, RFX5, RPC155, STAT1, TBP, TFIIC110); HepG2 (CEBPB, HSF1, TBP); K562 (RPC155, TBP, TFIIC110) | 2                             | NA                                                                                                  |
| 6   | ((rs7773193=C) or (rs17280818=T) and (rs2394100=T))   | rs17280818 | 28697751            | intergenic | <i>ZBED9</i> (dist=142639),<br><i>LINC01623</i> (dist=129651) | 7 (1)                                        | 65 (19)                                          | 100 (21)                                         | NA                                                                                                                                                                                        | 2                             | Whole Blood ( <i>ZFP57</i> )                                                                        |
| 6   | ((rs7773193=C) or (rs17280818=T) and (rs2394100=T))   | rs2394100  | 28422906            | intergenic | <i>ZSCAN23</i> (dist=11627),<br><i>GPX6</i> (dist=48167)      | 0 (0)                                        | 2 (0)                                            | 3 (0)                                            | NA                                                                                                                                                                                        | 0                             | NA                                                                                                  |
| 7   | ((rs12671658=T) or (rs12702656=A) and (rs11768586=G)) | rs12671658 | 7842281             | intronic   | <i>UMAD1</i>                                                  | 1 (0)                                        | 6 (0)                                            | 2 (0)                                            | NA                                                                                                                                                                                        | 7                             | NA                                                                                                  |

| Chr | 3-SNP Haplotype                                       | SNP        | Chr position (hg19) | Ontology   | Mapped Gene                                  | DHS overlap <sup>a</sup> , # EIDs (PBC EIDs) | H3K4me1 overlap <sup>a</sup> , # EIDs (PBC EIDs) | H3K4me3 overlap <sup>a</sup> , # EIDs (PBC EIDs) | Bound protein <sup>b</sup> : Cell line (protein)                                                                                                      | # Altered motifs <sup>c</sup> | Significant eQTLs <sup>d</sup> : Tissue (gene) |
|-----|-------------------------------------------------------|------------|---------------------|------------|----------------------------------------------|----------------------------------------------|--------------------------------------------------|--------------------------------------------------|-------------------------------------------------------------------------------------------------------------------------------------------------------|-------------------------------|------------------------------------------------|
| 7   | ((rs12671658=T) or (rs12702656=A) and (rs11768586=G)) | rs12702656 | 7851742             | intronic   | UMAD1                                        | 0 (0)                                        | 9 (3)                                            | 0 (0)                                            | NA                                                                                                                                                    | 4                             | NA                                             |
| 7   | ((rs12671658=T) or (rs12702656=A) and (rs11768586=G)) | rs11768586 | 7849806             | intronic   | UMAD1                                        | 1 (0)                                        | 6 (2)                                            | 1 (1)                                            | NA                                                                                                                                                    | 0                             | NA                                             |
| 9   | ((rs4979484=C) or ((rs13300483=T) and (rs7028891=G))) | rs4979484  | 117751450           | intergenic | TNFSF8(dist=58575), TNC(dist=30404)          | 22 (6)                                       | 33 (20)                                          | 11 (7)                                           | GM12878 (BATF, NFKB); GM12891 (NFKB); GM15510 (NFKB); GM18951 (NFKB); HeLa-S3 (AP2GAMMA, BAF155, CEBPB, CJUN, GTF2F1, JUND, P300, RAD21, RFX5, STAT3) | 3                             | NA                                             |
| 9   | ((rs4979484=C) or ((rs13300483=T) and (rs7028891=G))) | rs13300483 | 117643362           | intergenic | TNFSF15(dist=74954), TNFSF8(dist=12261)      | 0 (0)                                        | 11 (6)                                           | 2 (0)                                            | NA                                                                                                                                                    | 2                             | Whole Blood (TNFSF8)                           |
| 9   | ((rs4979484=C) or ((rs13300483=T) and (rs7028891=G))) | rs7028891  | 117645015           | intergenic | TNFSF15(dist=76607), TNFSF8(dist=10608)      | 0 (0)                                        | 4 (3)                                            | 1 (1)                                            | NA                                                                                                                                                    | 3                             | Whole Blood (TNFSF8)                           |
| 9   | ((rs7028891=G) and ((rs4979462=T) or (rs10739402=T))) | rs7028891  | 117645015           | intergenic | TNFSF15(dist=76607), TNFSF8(dist=10608)      | 0 (0)                                        | 4 (3)                                            | 1 (1)                                            | NA                                                                                                                                                    | 3                             | Whole Blood (TNFSF8)                           |
| 9   | ((rs7028891=G) and ((rs4979462=T) or (rs10739402=T))) | rs4979462  | 117567013           | intronic   | TNFSF15                                      | 36 (3)                                       | 79 (8)                                           | 31 (2)                                           | ECC-1 (ERALPHA_A); HUVEC (CFOS, GATA2); HeLa-S3 (ELK4); HepG2 (FOXA1); T-47D (ERALPHA_A, FOXA1, GATA3)                                                | 3                             | NA                                             |
| 9   | ((rs7028891=G) and ((rs4979462=T) or (rs10739402=T))) | rs10739402 | 116873231           | intergenic | KIF12(dist=11894), COL27A1(dist=44594)       | 1 (1)                                        | 22 (1)                                           | 1 (0)                                            | NA                                                                                                                                                    | 3                             | NA                                             |
| 9   | ((rs7028891=A) and ((rs2418376=A) or (rs10759773=G))) | rs7028891  | 117645015           | intergenic | TNFSF15(dist=76607), TNFSF8(dist=10608)      | 0 (0)                                        | 4 (3)                                            | 1 (1)                                            | NA                                                                                                                                                    | 3                             | Whole Blood (TNFSF8)                           |
| 9   | ((rs7028891=A) and ((rs2418376=A) or (rs10759773=G))) | rs2418376  | 118338852           | intergenic | DEC1(dist=173929), LOC101928775(dist=163097) | 0 (0)                                        | 0 (0)                                            | 0 (0)                                            | NA                                                                                                                                                    | 1                             | NA                                             |
| 9   | ((rs7028891=A) and ((rs2418376=A) or (rs10759773=G))) | rs10759773 | 118136224           | intronic   | DEC1                                         | 8 (0)                                        | 34 (1)                                           | 9 (0)                                            | NA                                                                                                                                                    | 7                             | NA                                             |
| 9   | ((rs10817678=G) or ((rs1407306=T) and (rs7048742=A))) | rs10817678 | 117579457           | intergenic | TNFSF15(dist=11049), TNFSF8(dist=76166)      | 0 (0)                                        | 4 (0)                                            | 2 (0)                                            | NA                                                                                                                                                    | 11                            | Whole Blood (TNFSF15, TNFSF8)                  |
| 9   | ((rs10817678=G) or ((rs1407306=T) and (rs7048742=A))) | rs1407306  | 117586409           | intergenic | TNFSF15(dist=18001), TNFSF8(dist=69214)      | 1 (0)                                        | 23 (2)                                           | 3 (0)                                            | NA                                                                                                                                                    | 9                             | Whole Blood (TNFSF8)                           |
| 9   | ((rs10817678=G) or ((rs1407306=T) and (rs7048742=A))) | rs7048742  | 117441568           | intronic   | LOC100505478                                 | 0 (0)                                        | 33 (2)                                           | 10 (1)                                           | NA                                                                                                                                                    | 0                             | NA                                             |

| Chr | 3-SNP Haplotype                                      | SNP        | Chr position (hg19) | Ontology   | Mapped Gene                                               | DHS overlap <sup>a</sup> , # EIDs (PBC EIDs) | H3K4me1 overlap <sup>a</sup> , # EIDs (PBC EIDs) | H3K4me3 overlap <sup>a</sup> , # EIDs (PBC EIDs) | Bound protein <sup>b</sup> : Cell line (protein)                                                       | # Altered motifs <sup>c</sup> | Significant eQTLs <sup>d</sup> : Tissue (gene) |
|-----|------------------------------------------------------|------------|---------------------|------------|-----------------------------------------------------------|----------------------------------------------|--------------------------------------------------|--------------------------------------------------|--------------------------------------------------------------------------------------------------------|-------------------------------|------------------------------------------------|
| 9   | (rs4979462=T) or ((rs10739402=T) and (rs10817564=C)) | rs4979462  | 117567013           | intronic   | <i>TNFSF15</i>                                            | 36 (3)                                       | 79 (8)                                           | 31 (2)                                           | ECC-1 (ERALPHA_A); HUVEC (CFOS, GATA2); HeLa-S3 (ELK4); HepG2 (FOXA1); T-47D (ERALPHA_A, FOXA1, GATA3) | 3                             | NA                                             |
| 9   | (rs4979462=T) or ((rs10739402=T) and (rs10817564=C)) | rs10739402 | 116873231           | intergenic | <i>KIF12</i> (dist=11894),<br><i>COL27A1</i> (dist=44594) | 1 (1)                                        | 22 (1)                                           | 1 (0)                                            | NA                                                                                                     | 3                             | NA                                             |
| 9   | (rs4979462=T) or ((rs10739402=T) and (rs10817564=C)) | rs10817564 | 116827079           | intronic   | <i>AMBP</i>                                               | 0 (0)                                        | 2 (2)                                            | 2 (0)                                            | NA                                                                                                     | 2                             | NA                                             |

<sup>a</sup> Counts of the number of consolidated cell types (EIDs) for which the SNP of interest overlaps the queried epigenomic assay peak (Roadmap Epigenomics Mapping Consortium processed data, Kundaje et al.<sup>21</sup>). "PBC EID": Separately considers peak overlap counts among the 29 blood/liver cell types available in Roadmap Epigenomics.

<sup>b</sup> Bound protein: Regulatory protein-binding ChIP-seq peak overlaps for specified proteins are provided for blood- or liver-related cell lines only (HaploReg v4, Ward and Kellis<sup>37</sup>).

<sup>c</sup> Altered motifs: The number of regulatory motifs predicted to be affected by the SNP based on position weight matrices (PWM) score changes (HaploReg v4, Ward and Kellis<sup>37</sup>).

<sup>d</sup> eQTLs: Reported significant eQTLs for whole blood, lymphoblastoid, and liver cell types only (GTEx Consortium<sup>20</sup>, HaploReg v4, Ward and Kellis<sup>37</sup>).

Abbreviations: EID, epigenome identifier; dist, distance; #, number; DHS, DNase I hypersensitivity site; eQTL, expression quantitative trait loci.
